# Supplementary material for: Lack of ApoA-I in ApoEKO Mice Causes Skin Xanthomas, Worsening of Inflammation, and Increased Coronary Atherosclerosis in the Absence of Hyperlipidemia
Source: PubMed Central journal article supplement — Arterioscler Thromb Vasc Biol. 2022 May 19;42(7):839–56. doi: 10.1161/ATVBAHA.122.317790 (PMC9205301; doi:10.1161/atvbaha.122.317790), 2022-05-19
Supplement: atv-42-839-s001.pdf [file atv-42-839-s001.pdf]

## **Lack of apoA-I in apoEKO mice causes skin xanthomas, worsening of inflammation and increased coronary atherosclerosis in the absence of hyperlipidemia**

Marco Busnelli<sup>1\*</sup>, Stefano Manzini<sup>1\*</sup>, Alice Colombo<sup>1</sup>, Elsa Franchi<sup>1</sup>, Fabrizia Bonacina<sup>1</sup>, Matteo Chiara<sup>2,3</sup>, Francesca Arnaboldi<sup>4</sup>, Elena Donetti<sup>4</sup>, Federico Ambrogi<sup>5</sup>, Roberto Oleari<sup>1</sup>, Antonella Lettieri<sup>1</sup>, David Horner<sup>2,3</sup>, Eugenio Scanziani<sup>6,7</sup>, Giuseppe Danilo Norata<sup>1,8</sup>, Giulia Chiesa<sup>1</sup>.

<sup>1</sup> Department of Pharmacological and Biomolecular Sciences, Università degli Studi di Milano, Milano, Italy; <sup>2</sup> Department of Biosciences, Università degli Studi di Milano, Milano, Italy; <sup>3</sup> Institute of Biomembranes, Bioenergetics and Molecular Biotechnologies, National Research Council, Bari, Italy; <sup>4</sup> Department of Biomedical Sciences for Health, Università degli Studi di Milano; <sup>5</sup> Department of Clinical Sciences and Community Health, Università degli Studi di Milano, Milano, Italy; <sup>6</sup> Department of Veterinary Medicine, Università degli Studi di Milano, Milan, Italy; <sup>7</sup> Mouse and Animal Pathology Laboratory (MAPLab), Fondazione UniMi, Milan, Italy. <sup>8</sup> Centro per lo Studio dell'Aterosclerosi, Bassini Hospital, Cinisello B, Milan, Italy.

\* These authors contributed equally to this article.

Corresponding authors info:

Marco Busnelli<sup>§</sup>, marco.busnelli@unimi.it

Stefano Manzini<sup>§</sup>, stefano.manzini@unimi.it

Giulia Chiesa<sup>§</sup>, giulia.chiesa@unimi.it

<sup>§</sup>Telephone: +39 02 503 18328; Dipartimento di Scienze Farmacologiche e Biomolecolari, via Balzaretti 9, 20133 Milano (MI), Italy

Figure S1

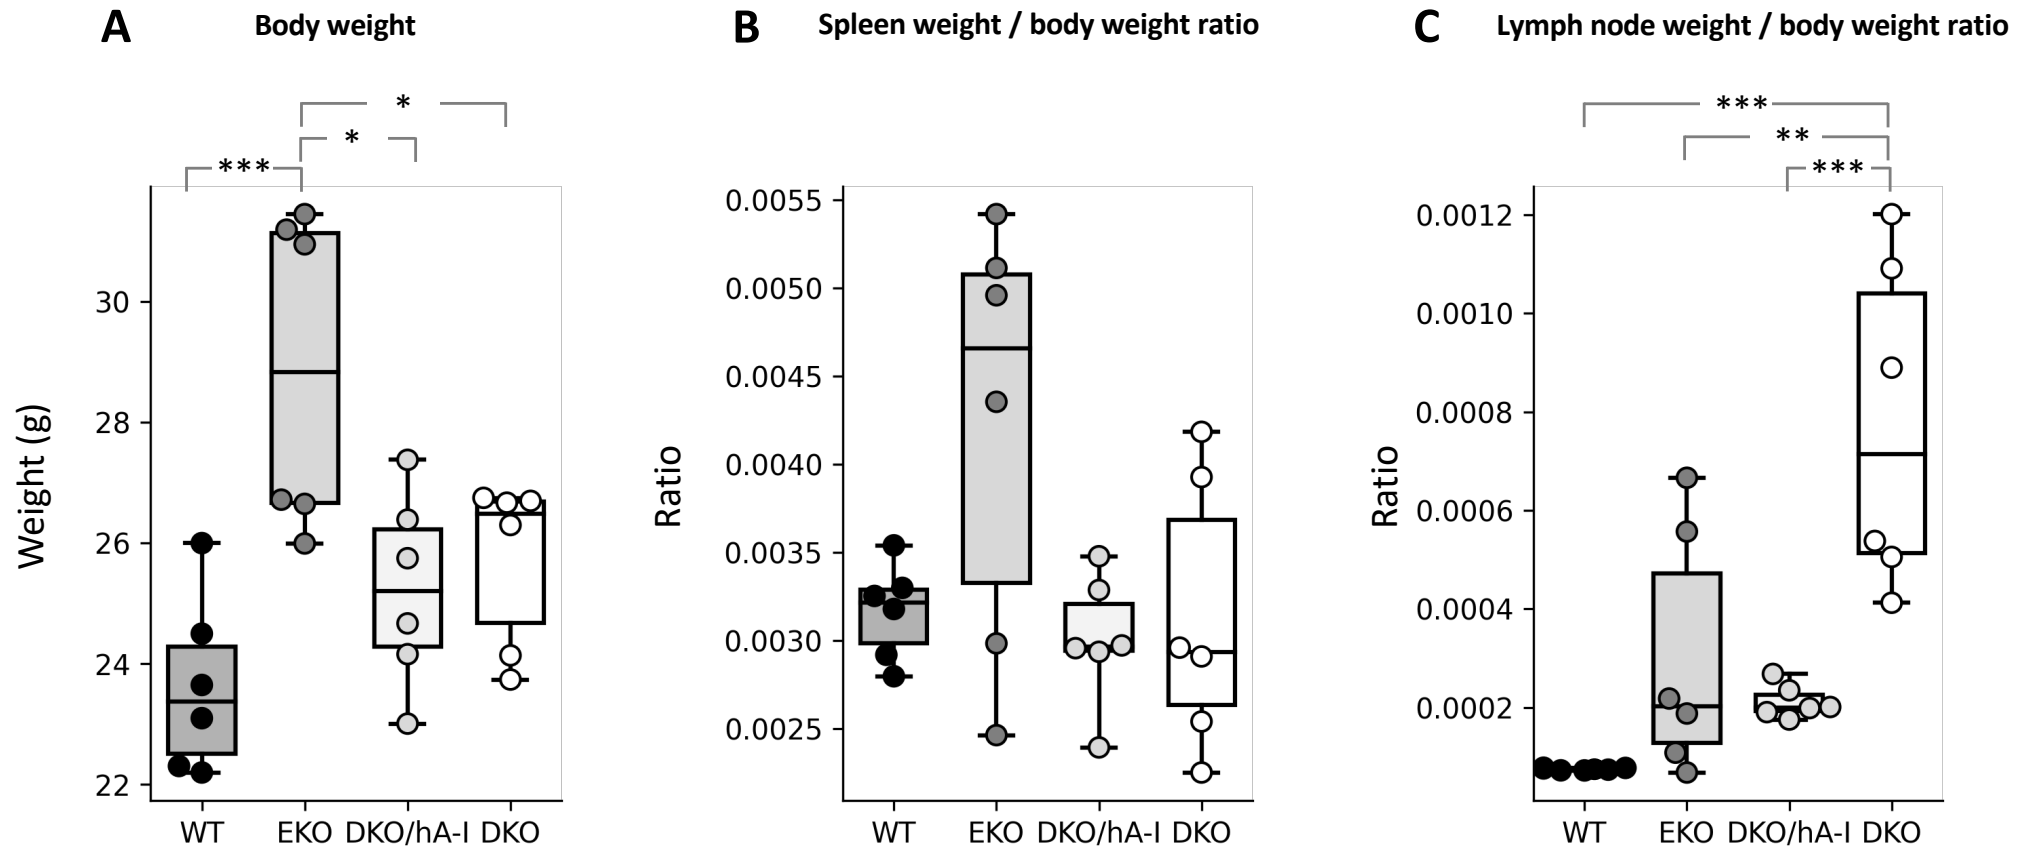

Body weight (**A**), spleen weight/body weight ratio (**B**), lymph node weight/body weight ratio (**C**) in the four genotypes,  $n=6$ . \* $p<0.05$ ; \*\* $p<0.01$ ; \*\*\* $p<0.001$ . Statistically significant differences were determined with ANOVA followed by Tukey's post-hoc test. The upper and lower ends of the boxes indicate the 25th and 75th percentiles, respectively. The length of the box shows the interquartile range within which 50% of the values are located. The solid grey lines denote the median. Exact adjusted  $p$ -values are shown in Table S1.

Figure S2

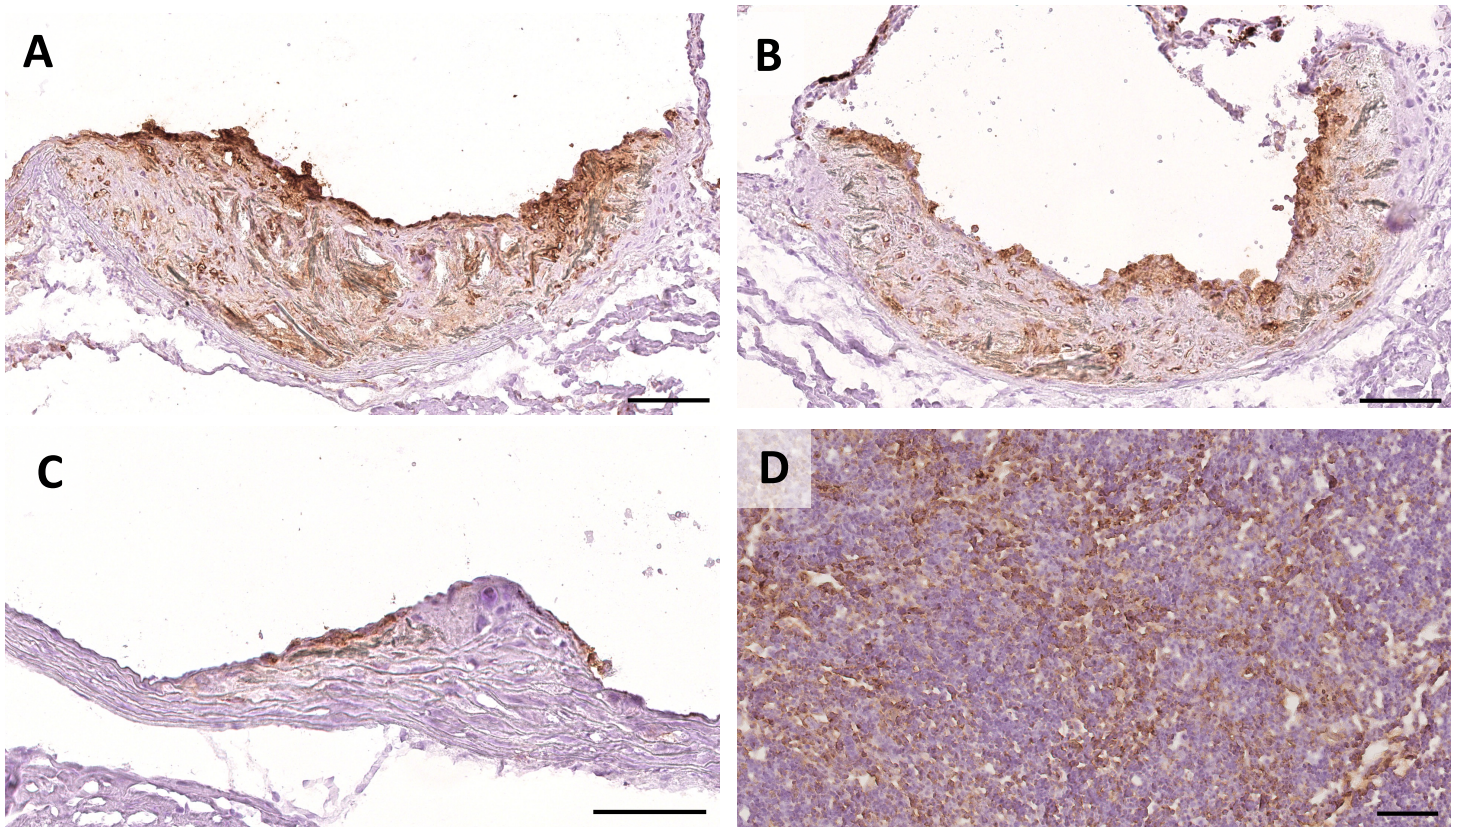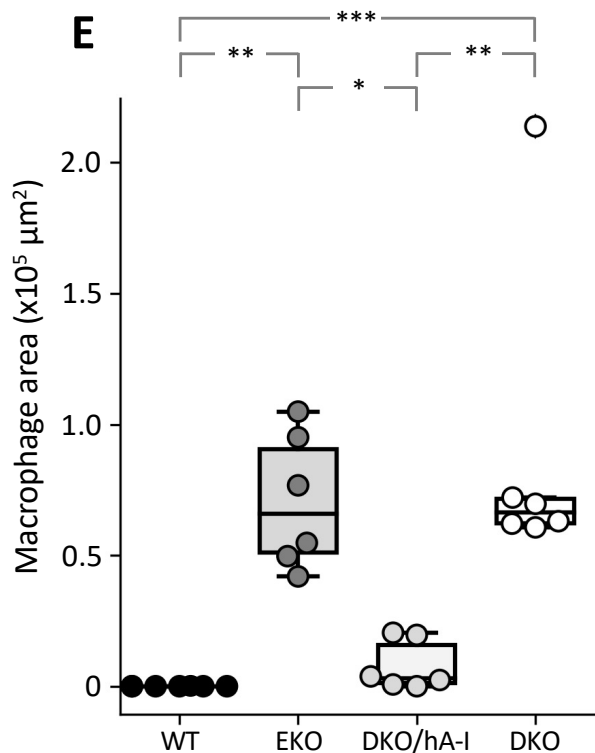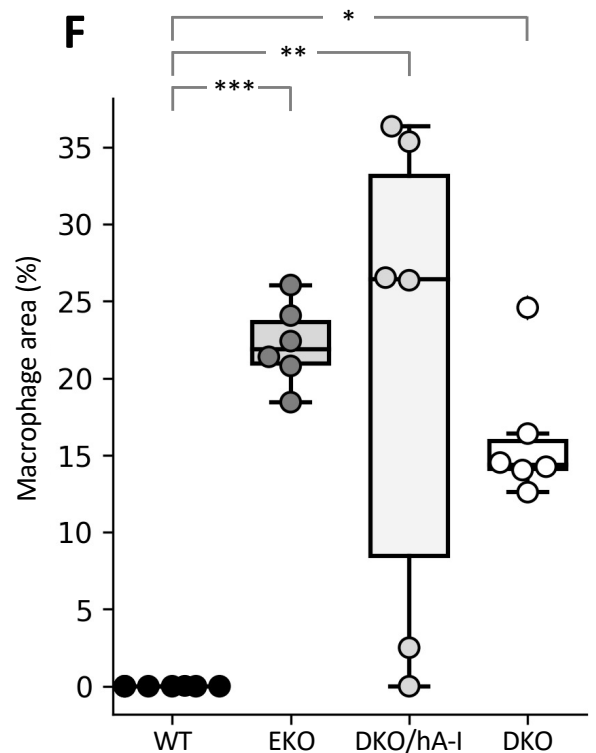

Immunohistochemical staining of macrophages in the aortic sinus of DKO (A), EKO (B) and DKO/hA-I (C). The area occupied by macrophages was significantly reduced in DKO/hA-I vs EKO and DKO mice (E), although plaque % composition was not different among EKO, DKO/hA-I and DKO (F). A positive control from a lymph node cryosection is shown (D). Statistically significant differences were determined by ANOVA followed by Tukey's post-hoc. \*  $p < 0.05$ ; \*\*  $p < 0.01$ ; \*\*\*  $p < 0.001$ . Bar length: 100  $\mu\text{m}$ . The upper and lower ends of the boxes indicate the 25<sup>th</sup> and 75<sup>th</sup> percentiles, respectively. The length of the box shows the interquartile range within which 50% of the values are located. The solid grey lines denote the median. Exact adjusted p-values are shown in Table S1.



**Figure S4**

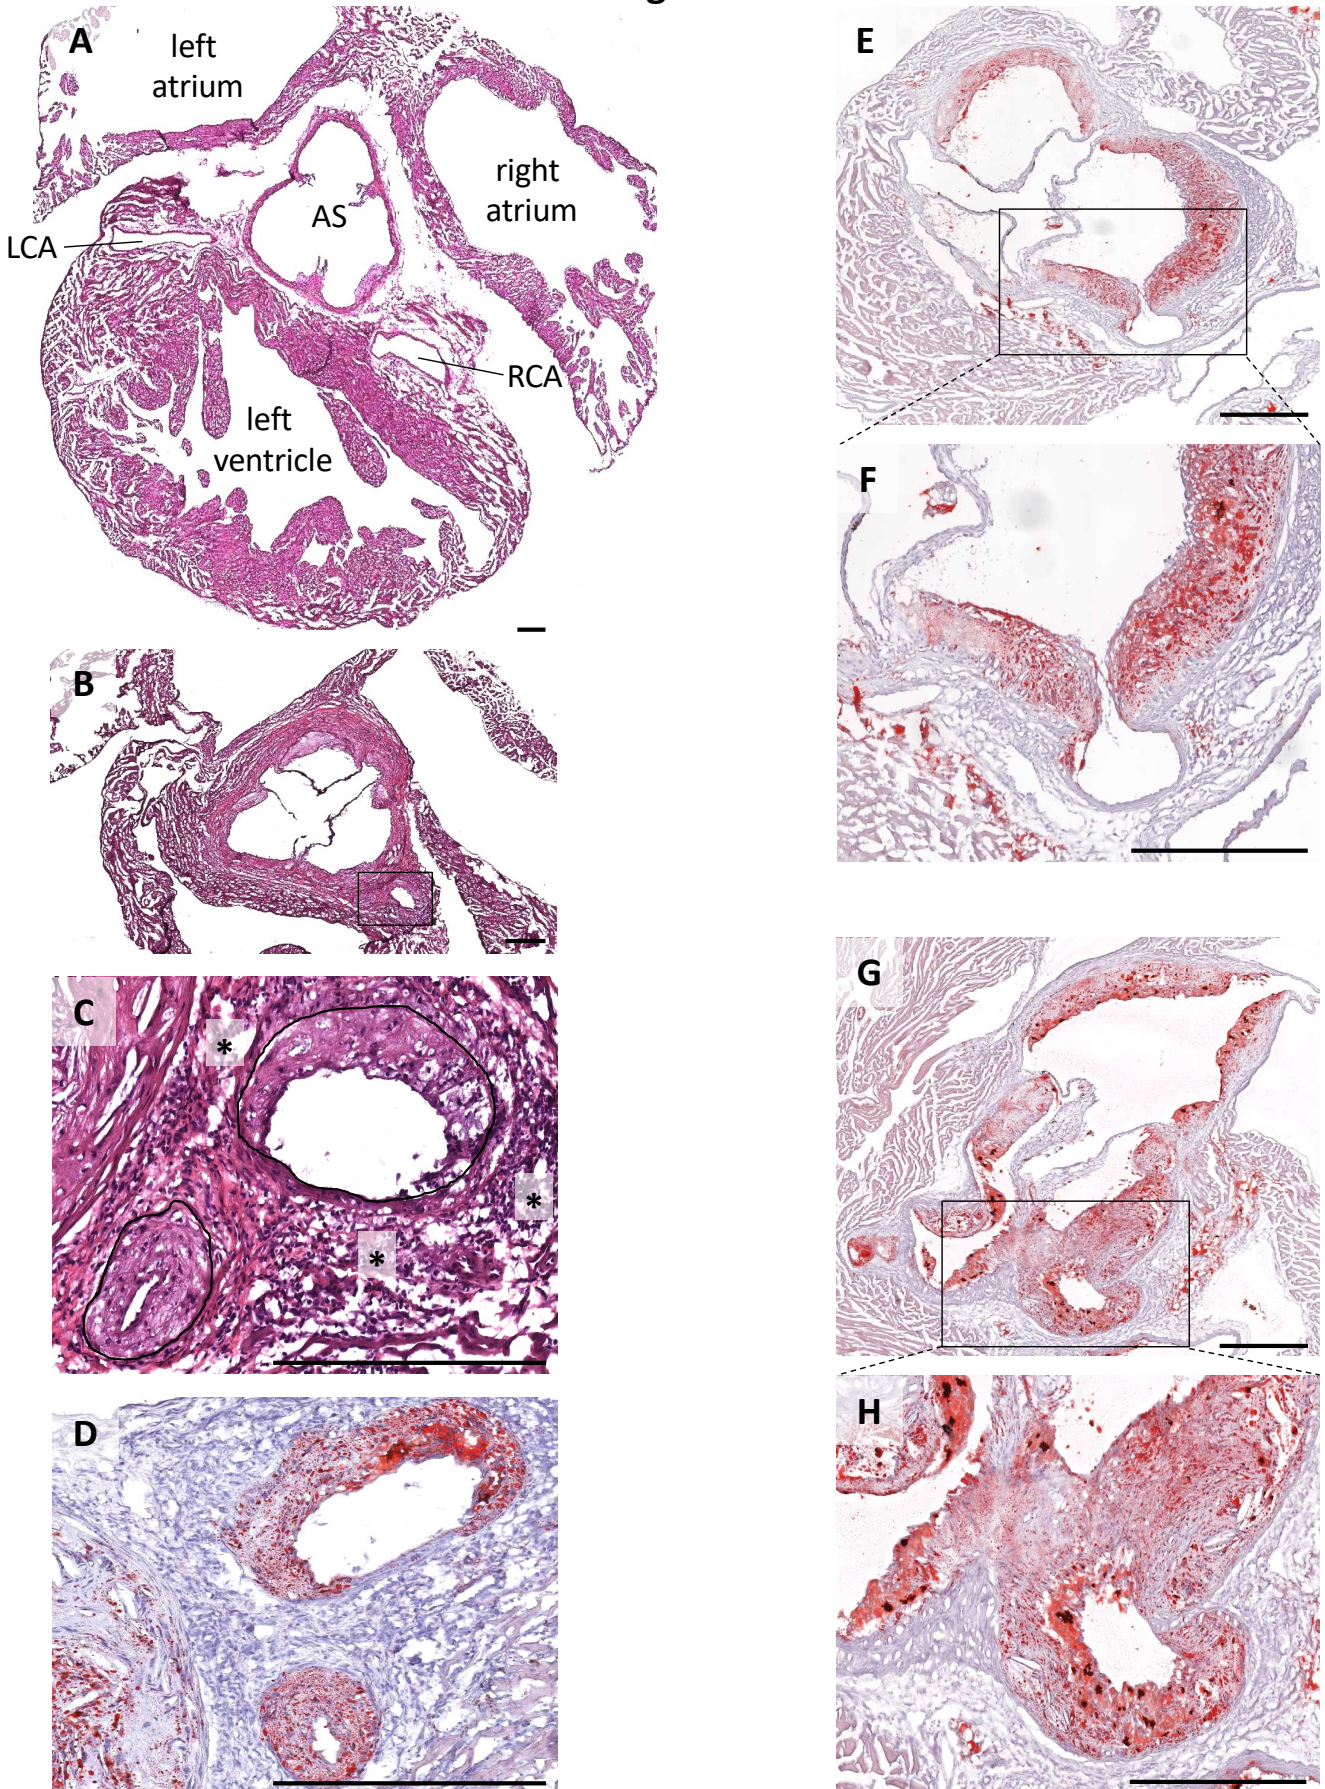

Representative H&E staining of the aortic sinus (AS) with the origin of left (LCA) and right coronary arteries (RCA) (A). Aortic sinus from a DKO mouse with coronary plaques (B). Magnifications showing lymphocytes infiltrating the myocardium around the coronary arteries (asterisks, C) and neutral lipid accumulation in coronary plaques by O.R.O. staining (D). Representative O.R.O. stained pictures of plaque development at the ostia of the right coronary artery at the aortic root of EKO (E) and DKO mice (G). Magnifications of the same plaques are shown (F, H). Bar: 250  $\mu$ m.

**Figure S5**

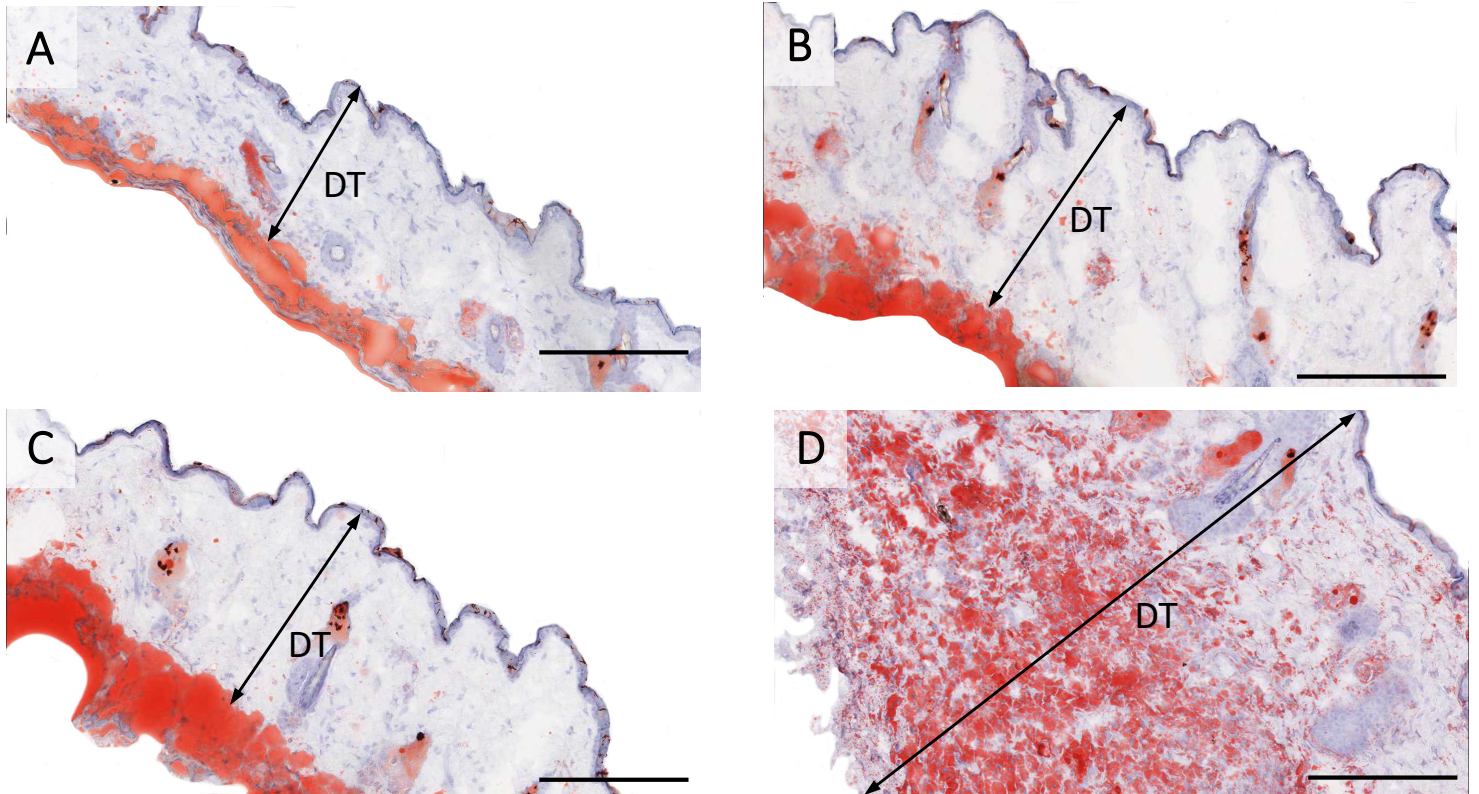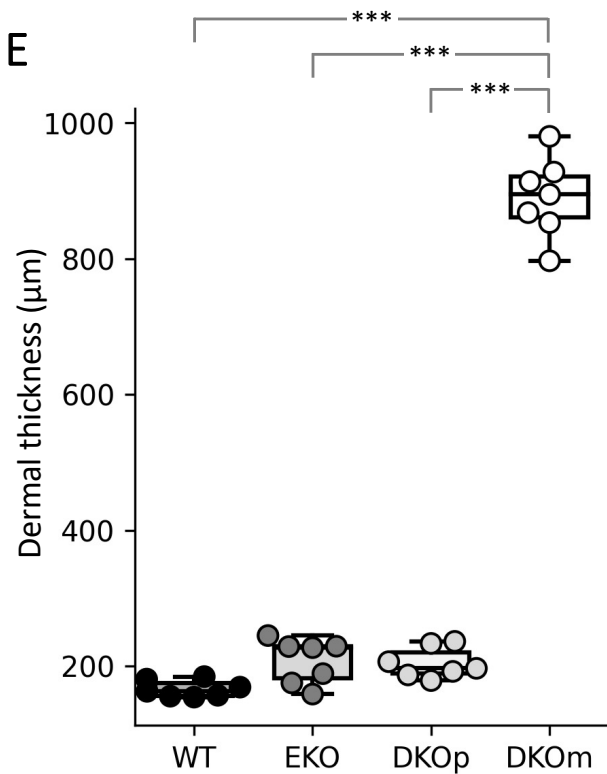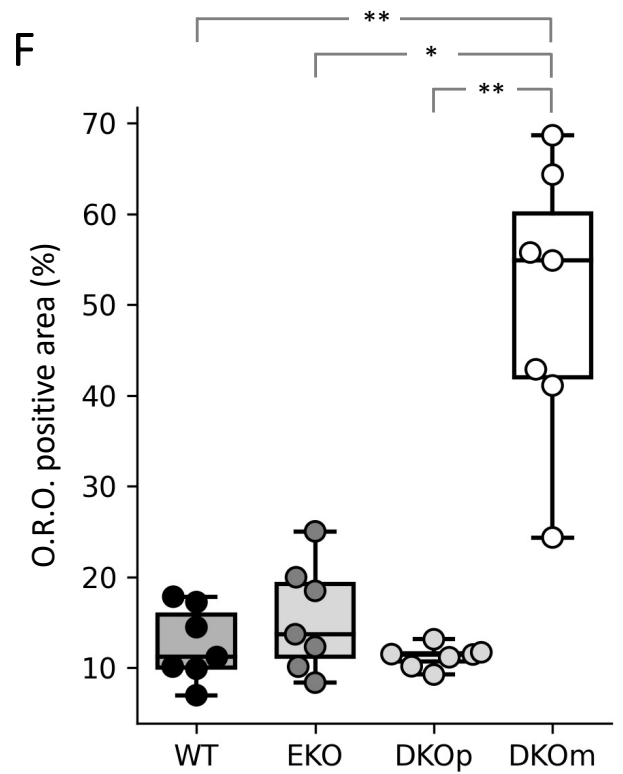

Representative photomicrographs of skin cryosections stained with O.R.O. from WT (A), EKO (B), DKO/hA-I (C) and DKO (D). The epidermis was unaltered regardless of the genotype, whereas, only in DKO, the dermis was thickened (E) and showed increased neutral lipid deposition (F). DT = dermal thickness (n=7). Statistically significant differences were determined by ANOVA followed by Tukey's post-hoc in (E) and by Kruskal-Wallis followed by Dunn's post-hoc test in (F). \*p<0.05; \*\*p<0.01; \*\*\*p<0.001. Bar length = 100 µm. The upper and lower ends of the boxes indicate the 25<sup>th</sup> and 75<sup>th</sup> percentiles, respectively. The length of the box shows the interquartile range within which 50% of the values are located. The solid grey lines denote the median. Exact adjusted p-values are shown in Table S1.

**Figure S6**

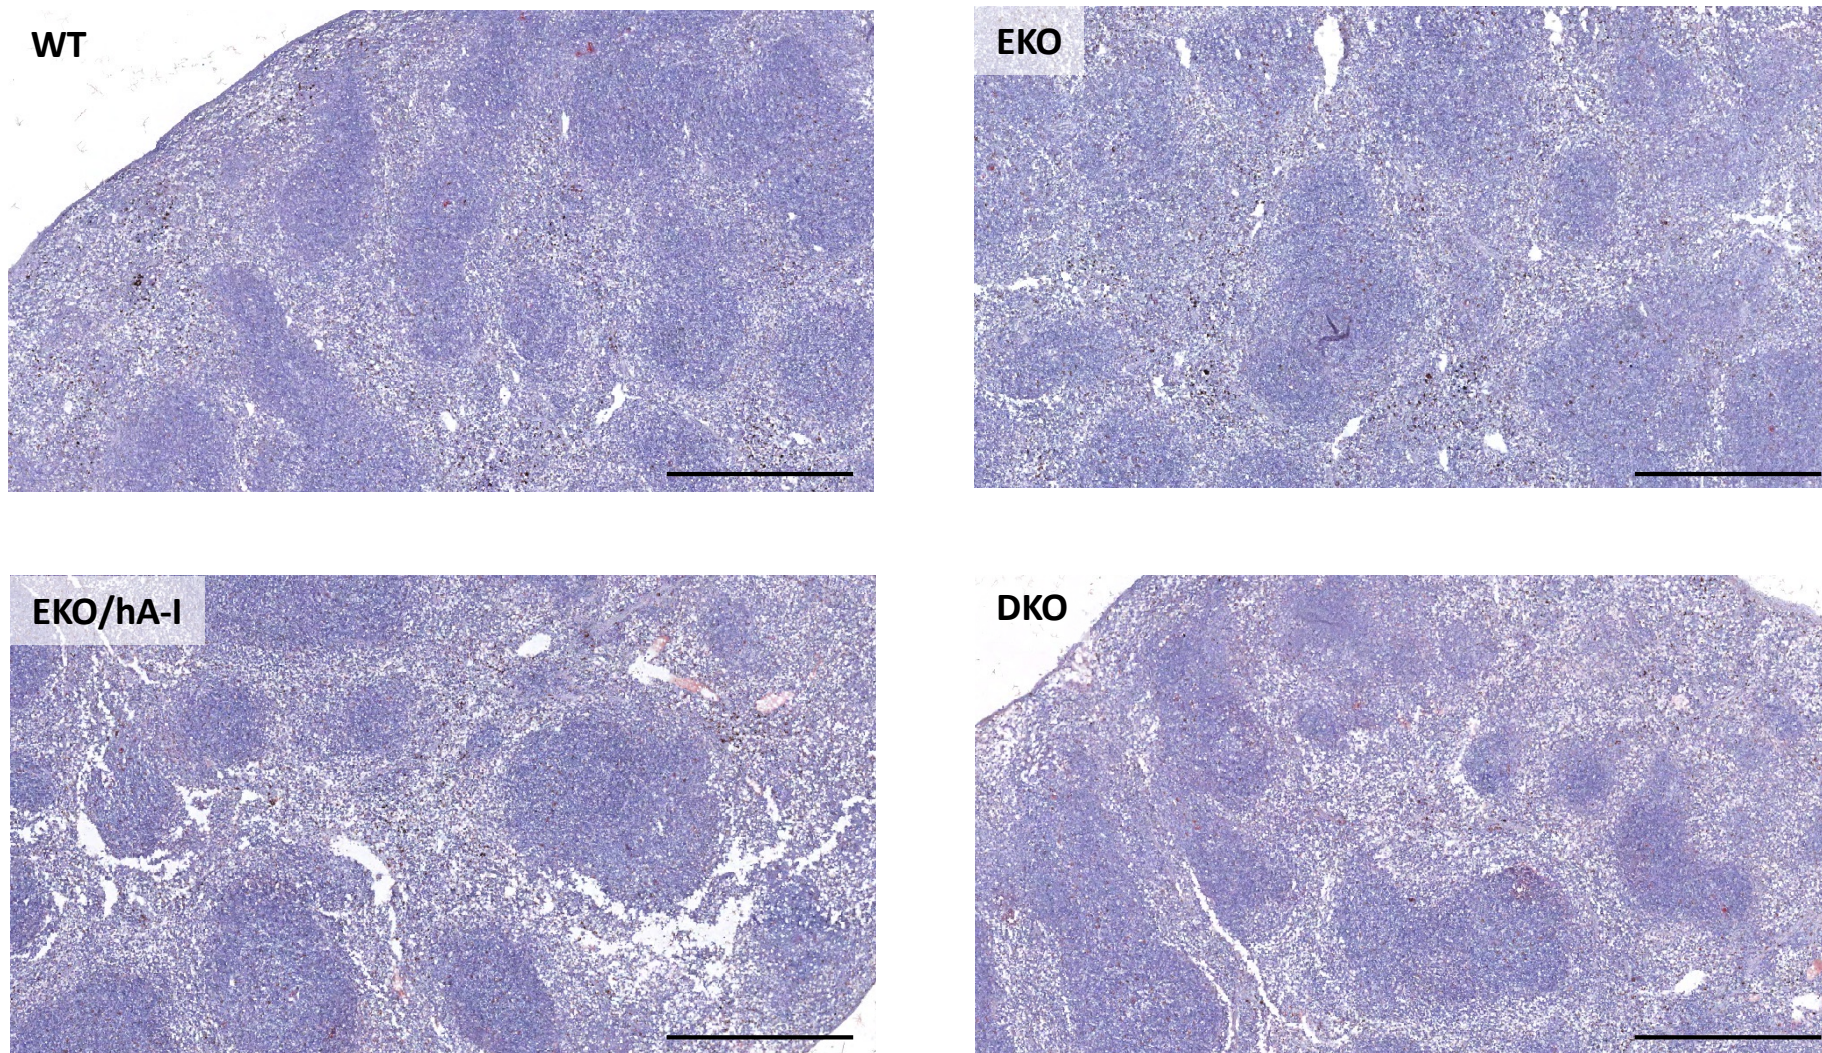

Representative photomicrographs of spleen cryosections stained with Oil Red O. Spleen histology and neutral lipid deposition were unaffected by genotype. Bar length = 200 μm).

**Figure S7**

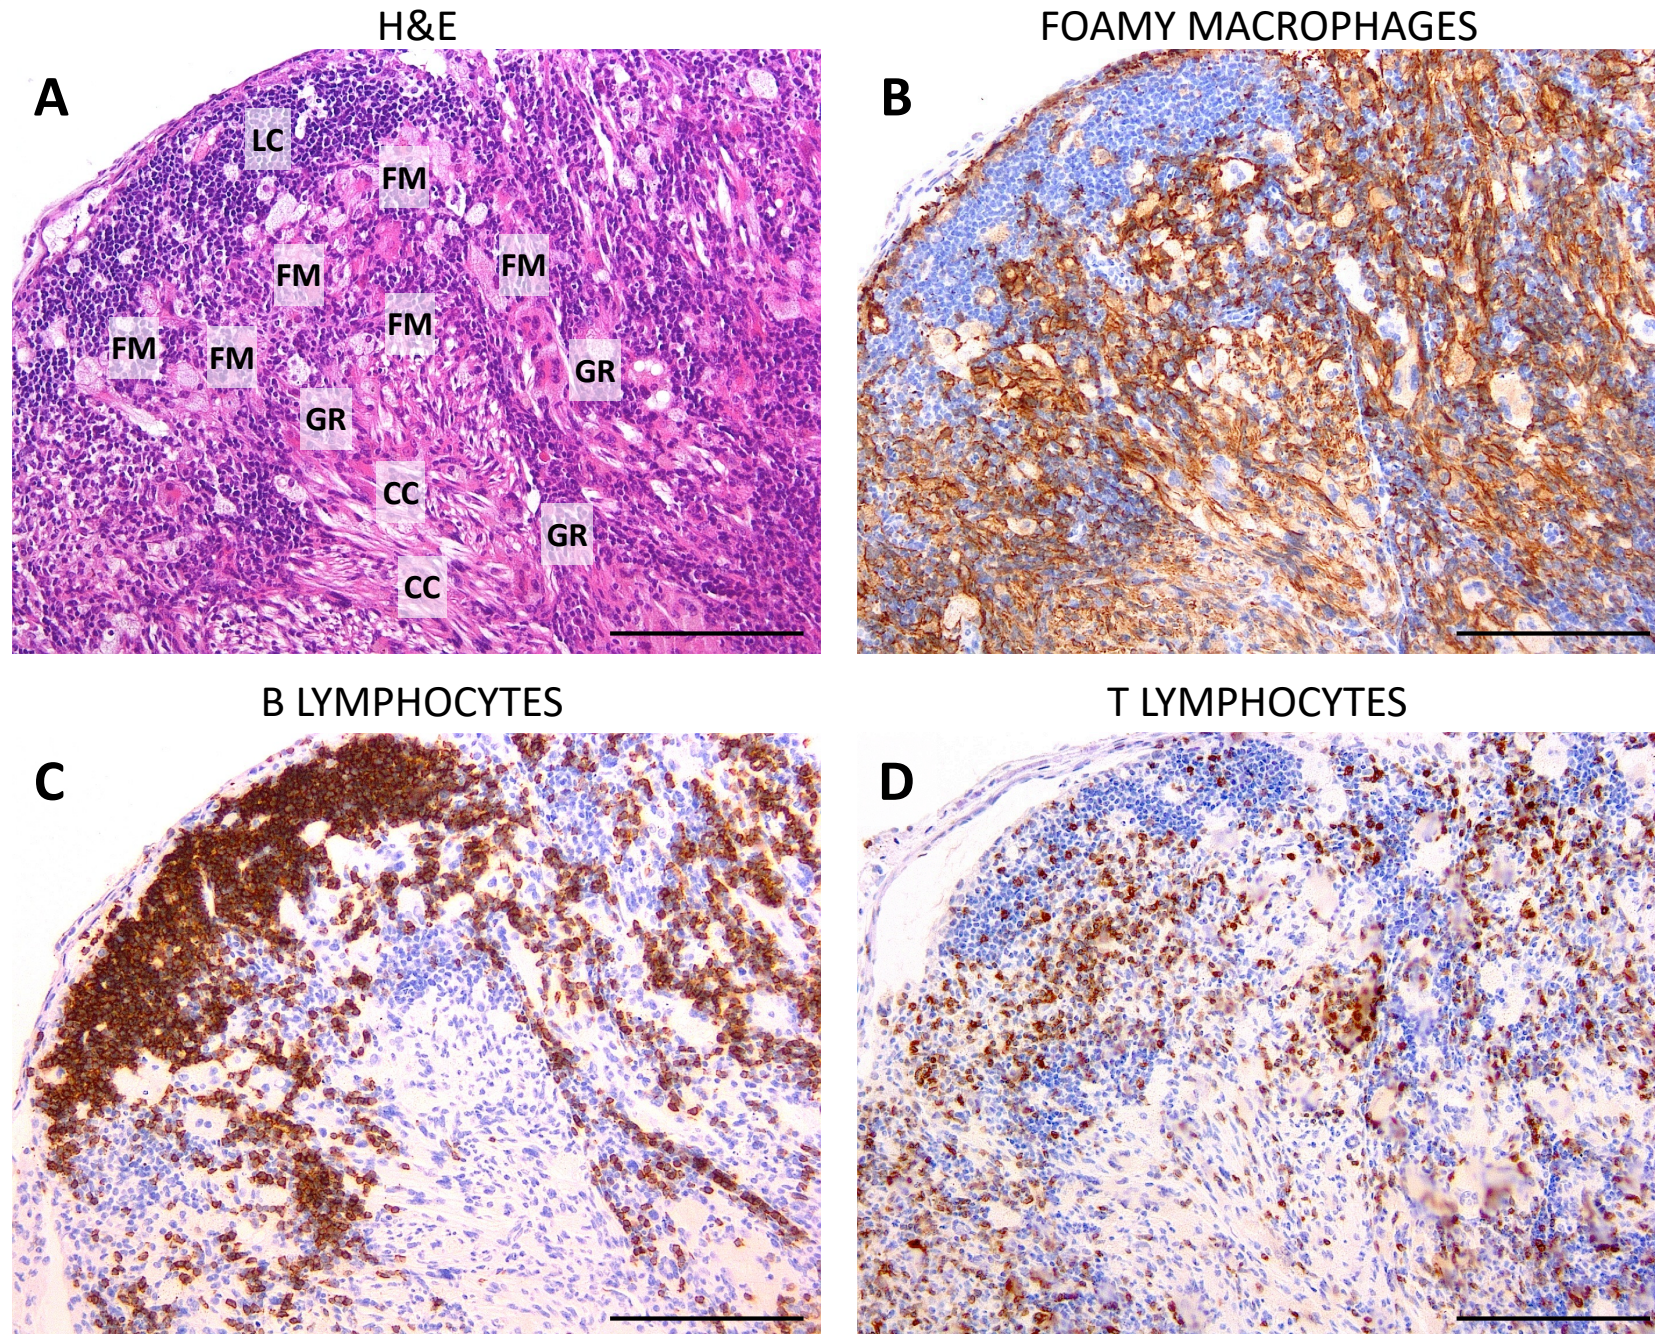

Histological and immunohistochemical characterization of a DKO lymph node. H&E staining (**A**) FM: foamy macrophages; LC: lymphoid cells; GR: granulomatous reactions; CC: cholesterol crystals. Foamy macrophages (IBA1<sup>+</sup> cells; **B**), B lymphocytes (B220<sup>+</sup> cells; **C**), T lymphocytes (CD3<sup>+</sup> cells; **D**). Bar length=100  $\mu$ m.





**Figure S9**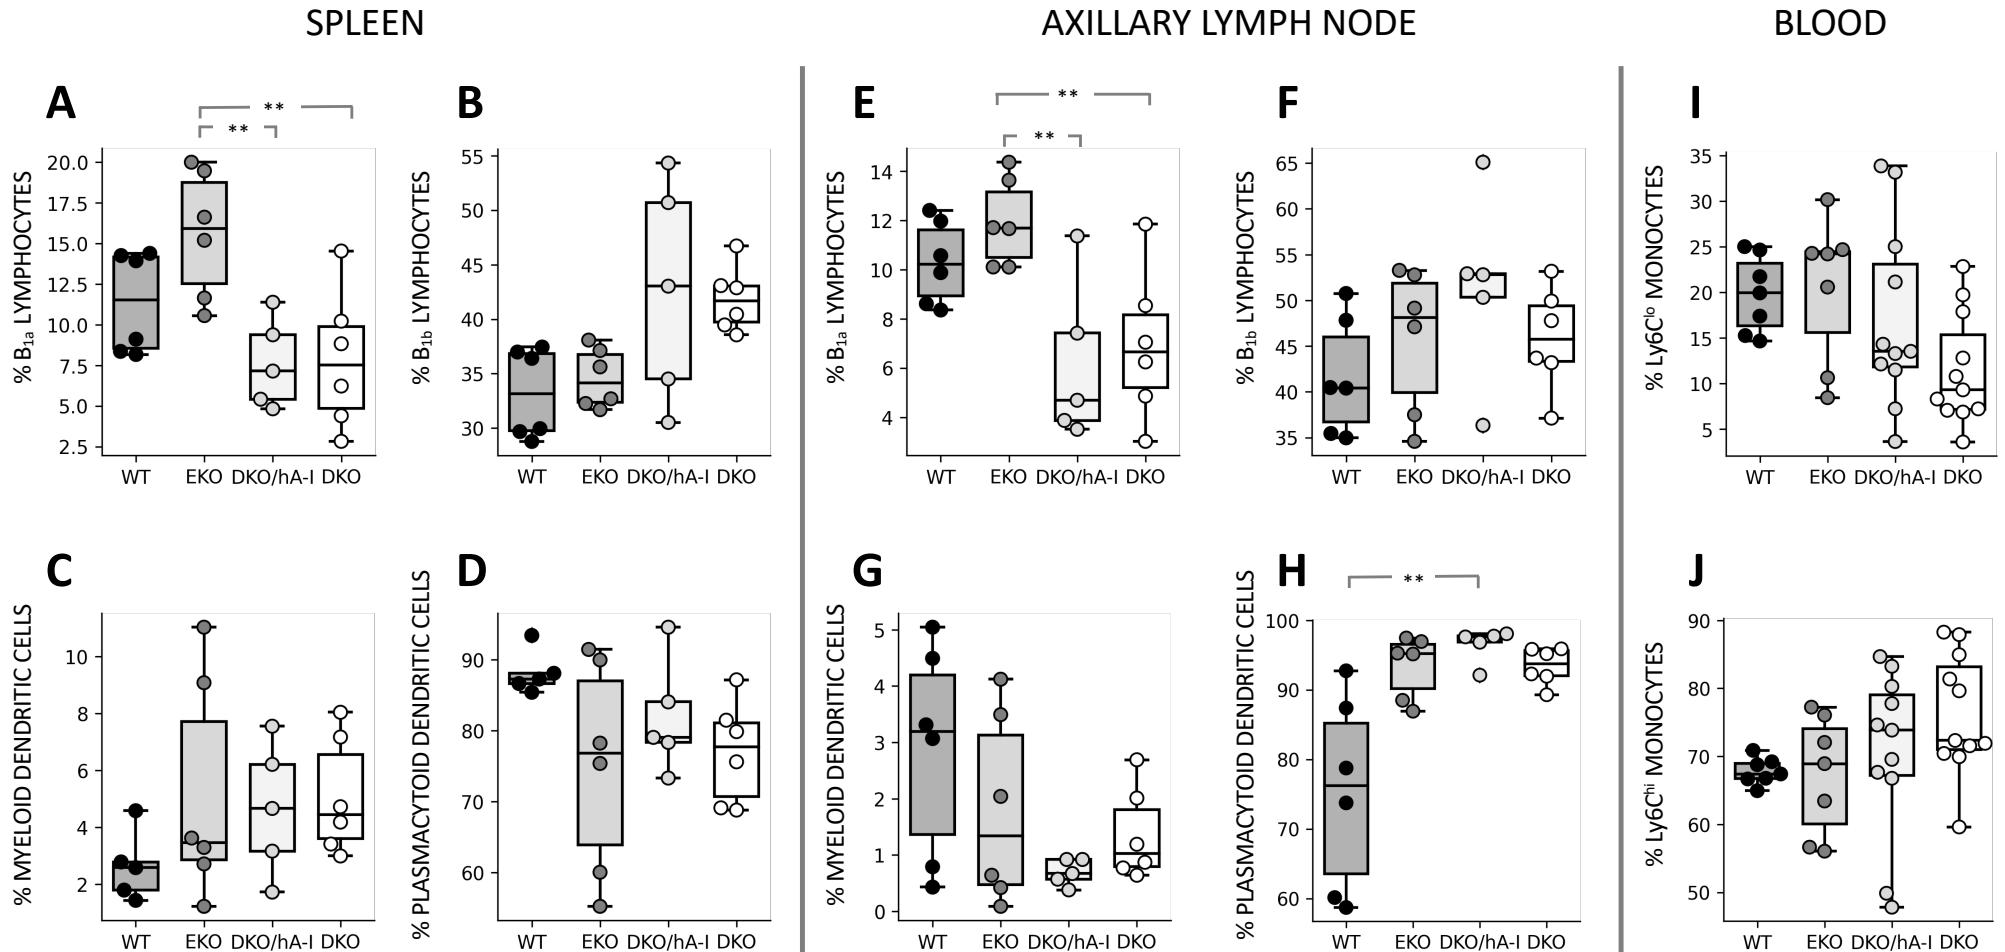

FACS analyses results for immune cells subsets in spleen (left), axillary lymph node (middle) and blood (right) in the four genotypes. \*p<0.05; \*\*p<0.01. Statistically significant differences were determined with ANOVA followed by Tukey's post-hoc test except for **H**, where Kruskal-Wallis followed by Dunn's post-hoc was used. The upper and lower ends of the boxes indicate the 25<sup>th</sup> and 75<sup>th</sup> percentiles, respectively. The length of the box shows the interquartile range within which 50% of the values are located. The solid grey lines denote the median. Exact adjusted p-values are shown in Table S1.

**Figure S10**

■ EKO/hA-I □ DKO

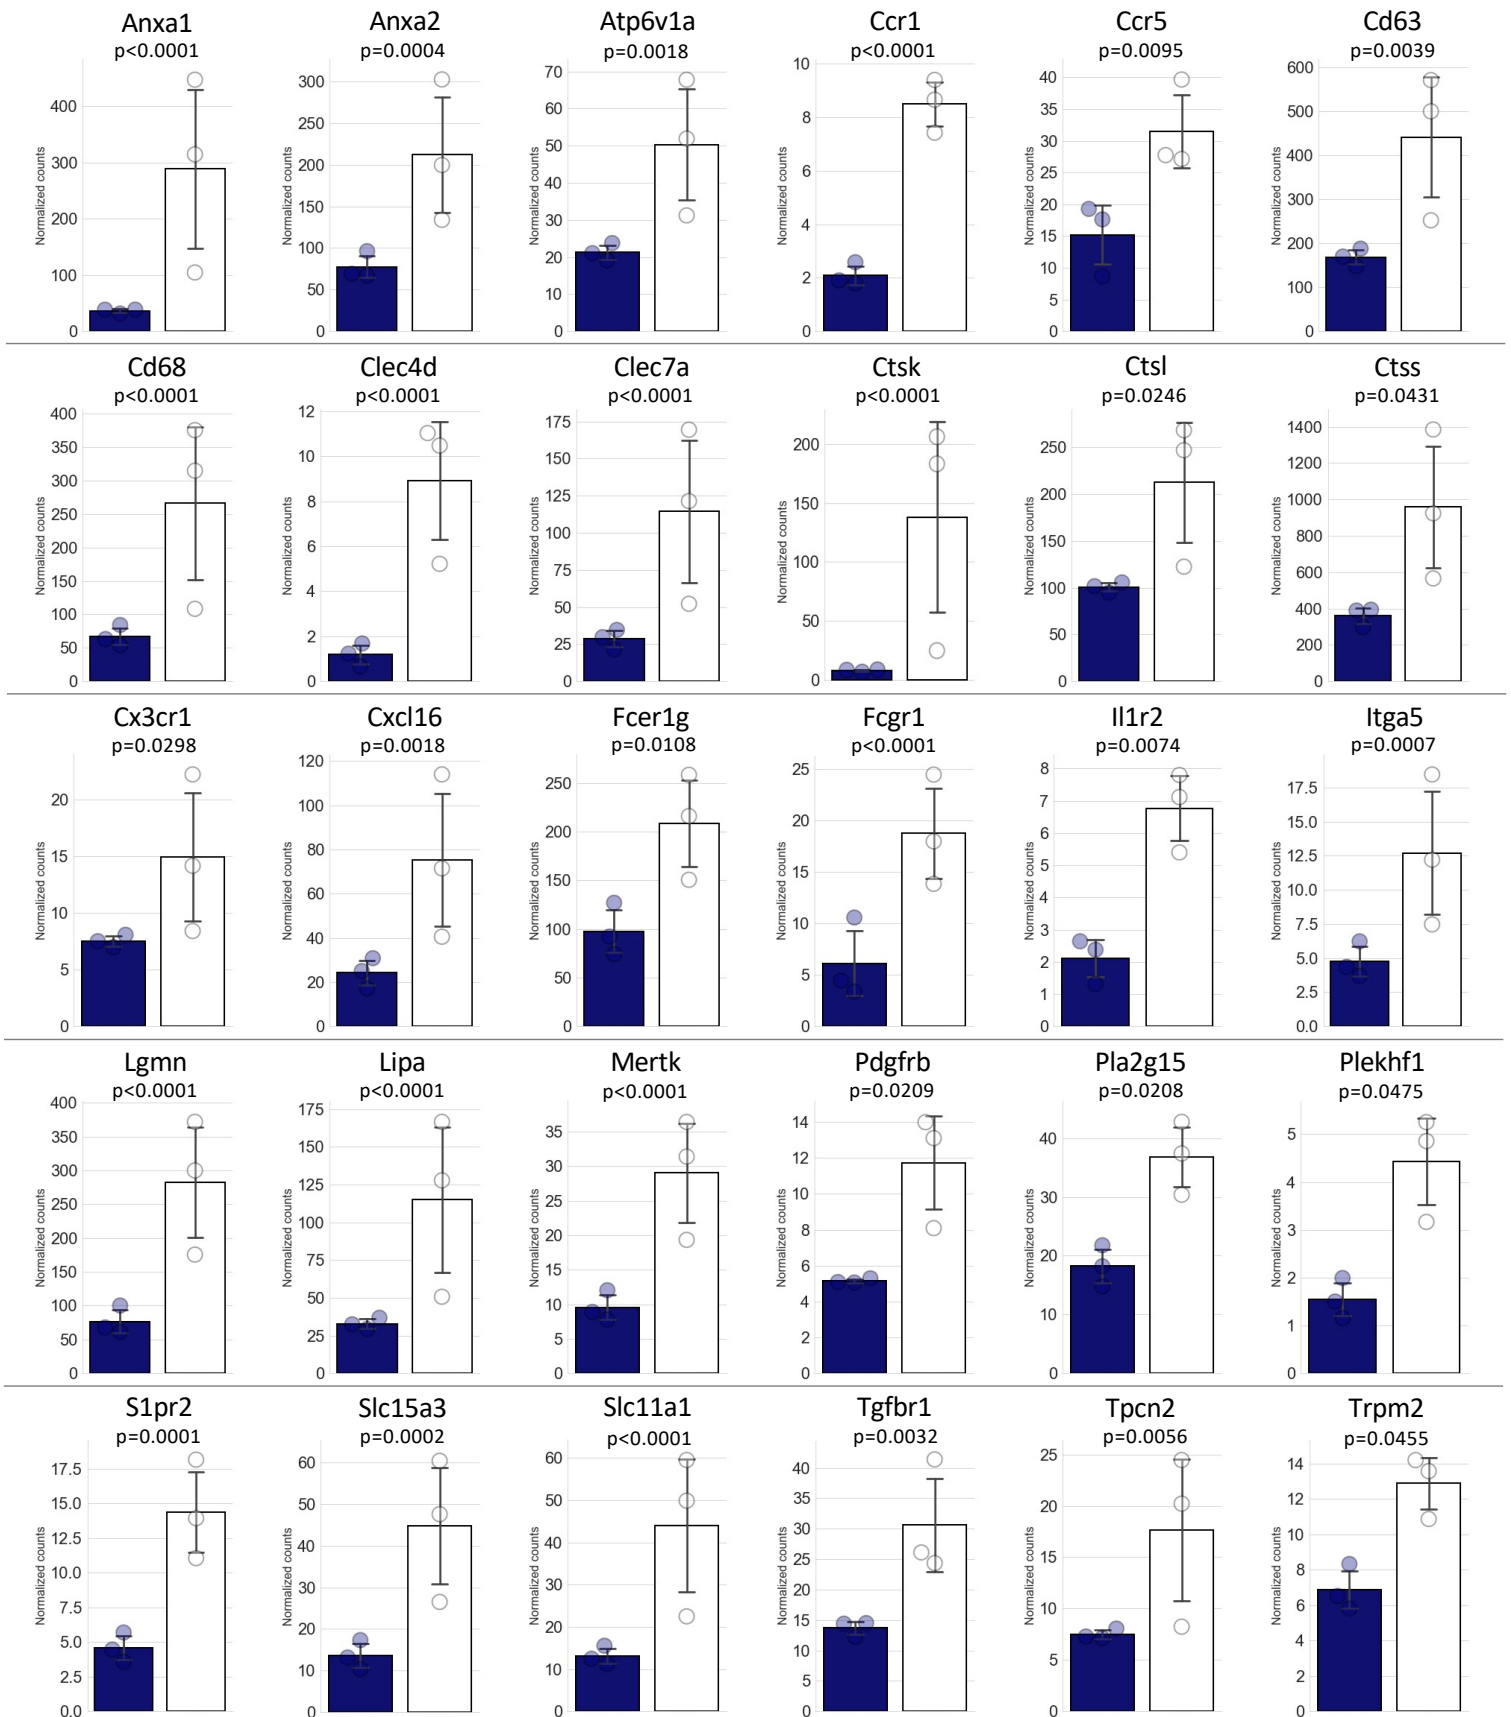

RNAseq expression levels (normalized counts) is charted for selected macrophage markers that show increased expression in DKO mice. Transcript abundance estimation and differential expression analyses were performed using the standard Bowtie-Tophat-Cuffdiff pipeline.

**Figure S11**

■ EKO/hA-I □ DKO

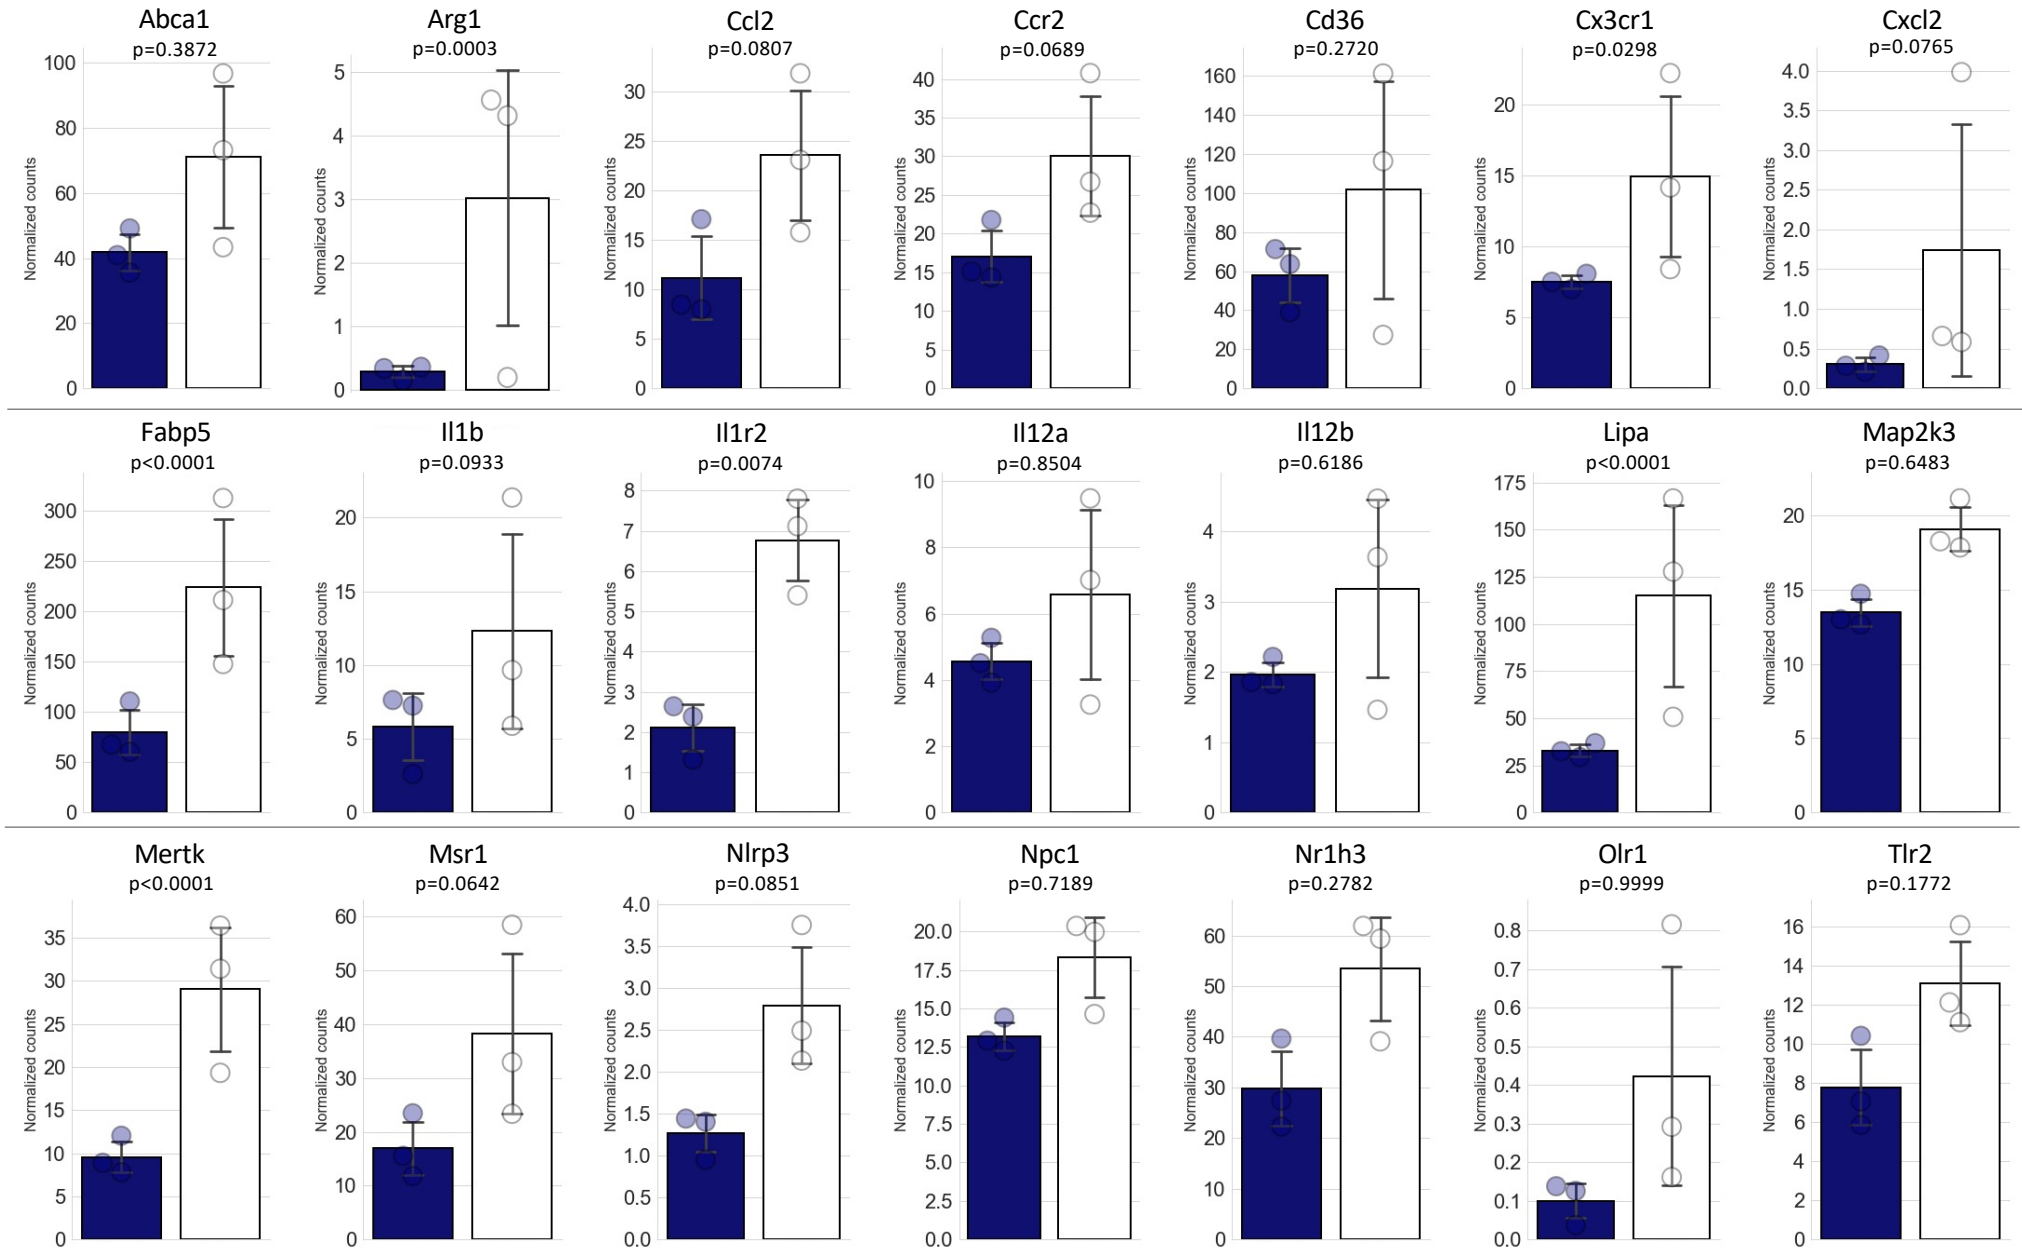

RNAseq expression levels (normalized counts) is charted for selected foam cell marker that show increased expression in DKO mice. Transcript abundance estimation and differential expression analyses were performed using the standard Bowtie-Tophat-Cuffdiff pipeline.

**Figure S12**

■ EKO/hA-I □ DKO

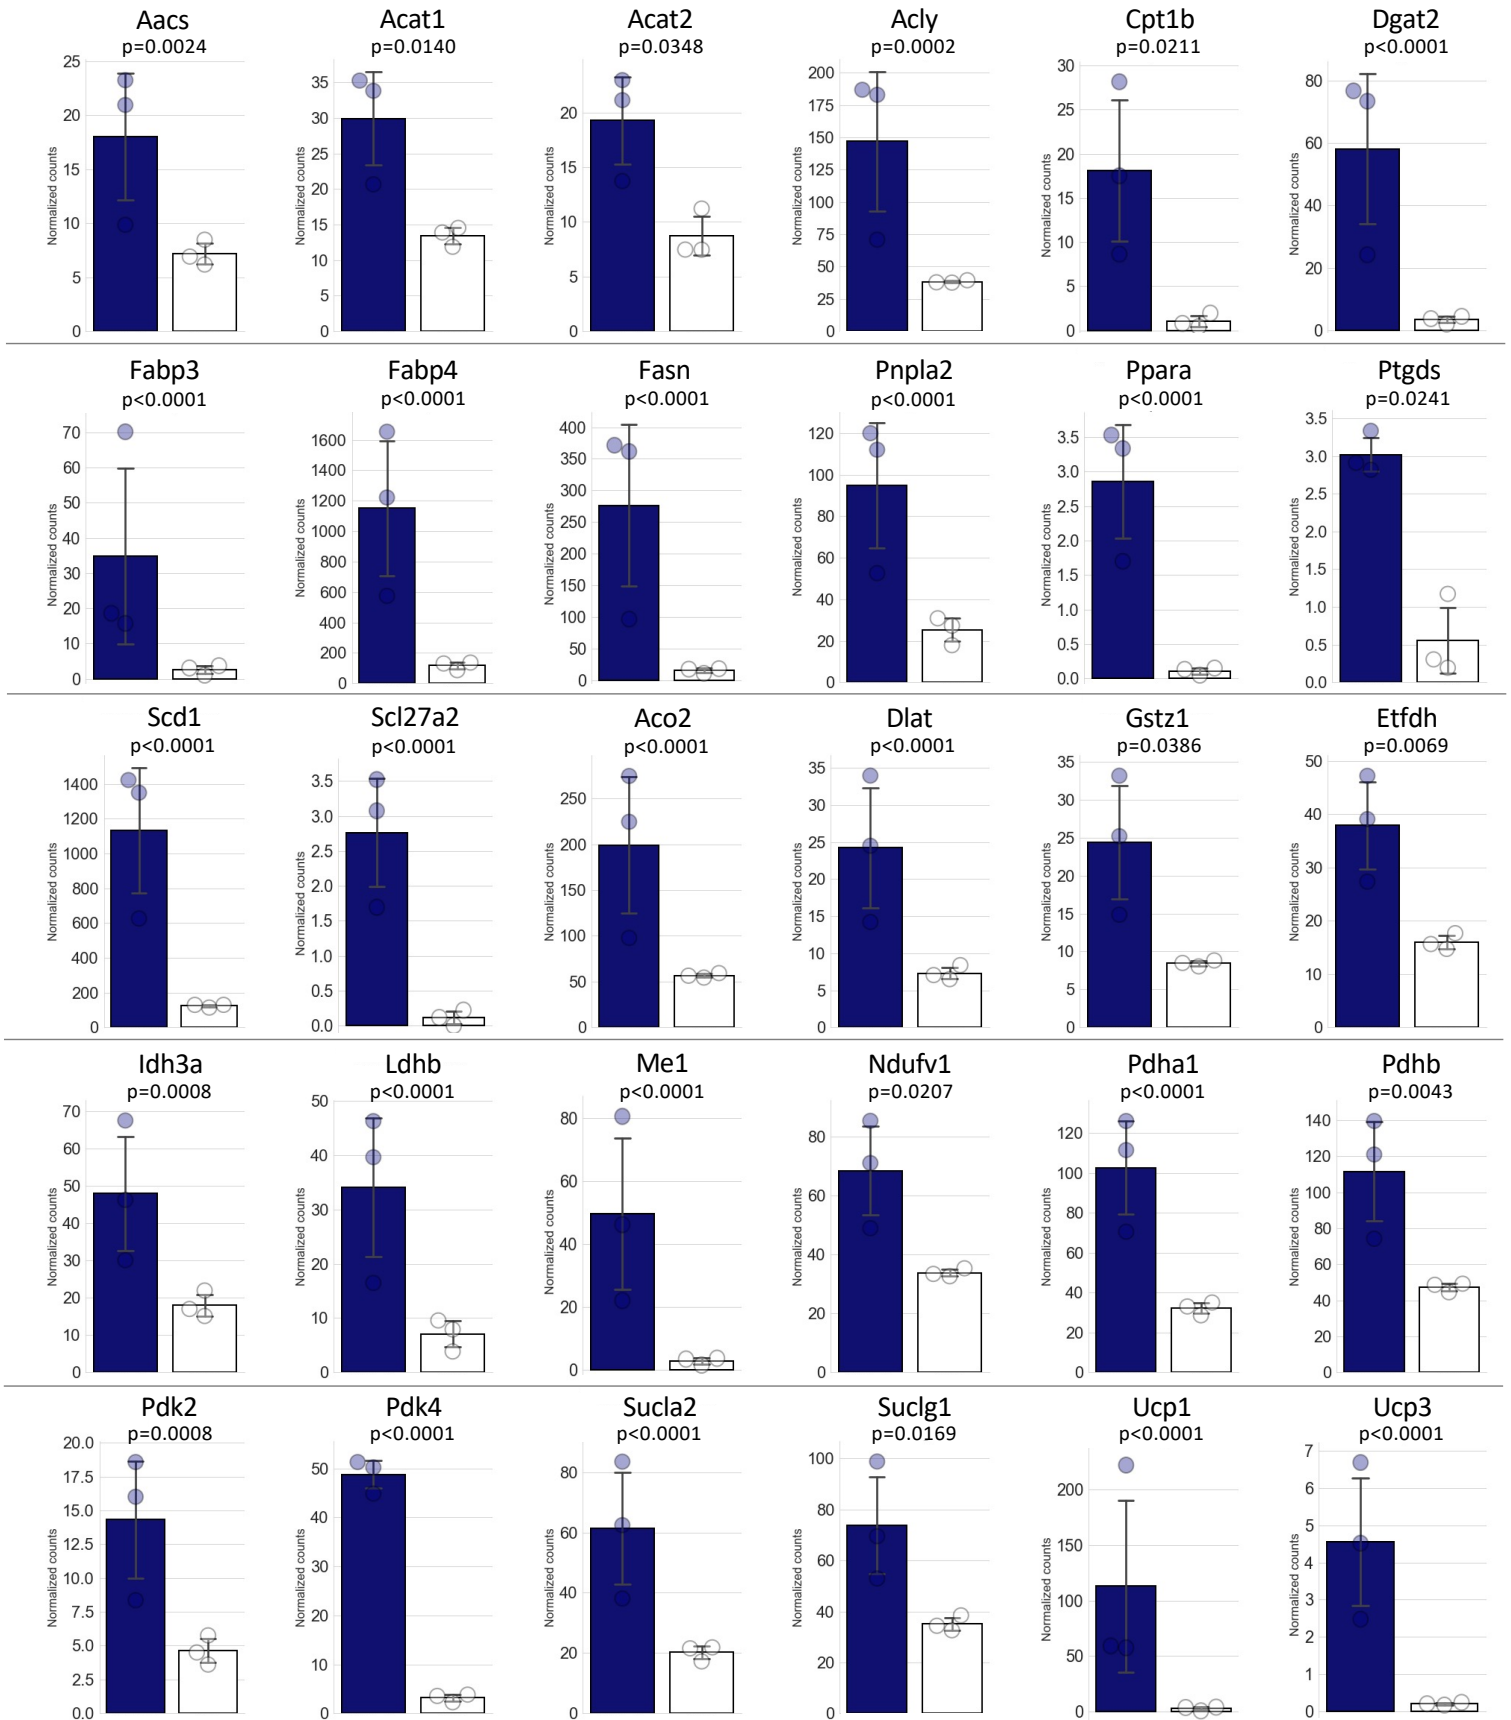

RNAseq expression levels (normalized counts) is charted for selected metabolic genes that show increased expression in DKO mice. Transcript abundance estimation and differential expression analyses were performed using the standard Bowtie-Tophat-Cuffdiff pipeline.

**Figure S13**

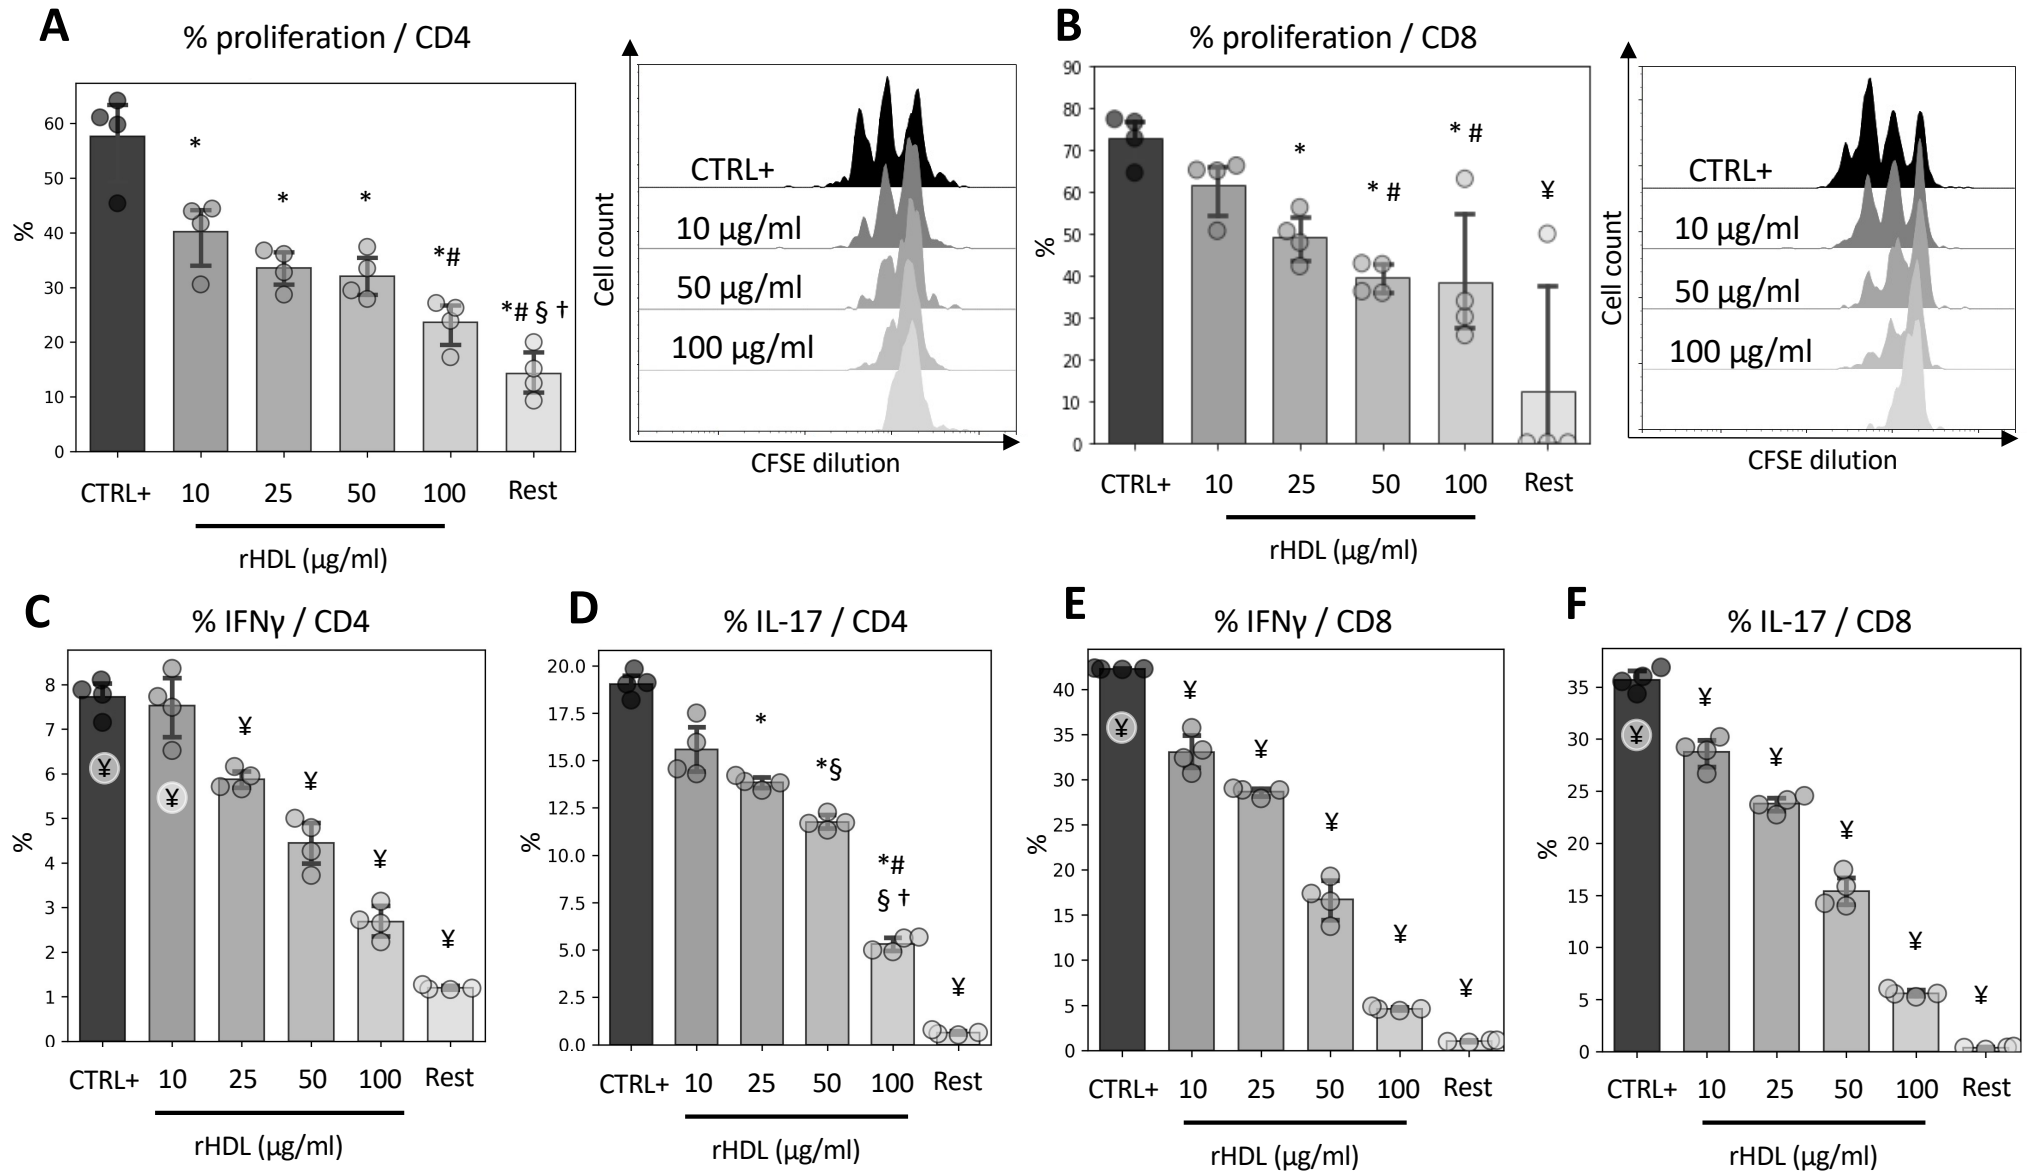

**Figure 1. rHDL dampens T cell proliferation and cytokine production.**

**A-B:** Impact of increasing concentration of rHDL (0, 10, 25, 50 and 100  $\mu\text{g/ml}$ ) on CD4+ and CD8+ T cell proliferation after 4 days of activation compared to resting (not stimulated sample). Representative histograms of CFSE dilution from flow cytometry analysis are shown.

**C-F:** Percentage of activated CD4+ or CD8+ T cells from apoE KO mice expressing interferon  $\gamma$  (IFN $\gamma$ ) (CD4 Panel C, and CD8 Panel E) or IL-17 (CD4 Panel D, and CD8 Panel F) T following incubation with rHDL (0, 10, 25, 50 and 100  $\mu\text{g/ml}$ ). Data for resting (rest) T cells are also presented (last column of each graph).  $P < 0.05$ : \* vs CTRL+; # vs 10; § vs 25; † vs 50; ‡ vs 100; ¥: vs everything else. Exact adjusted p-values are shown in Table S1.

**Figure S14**

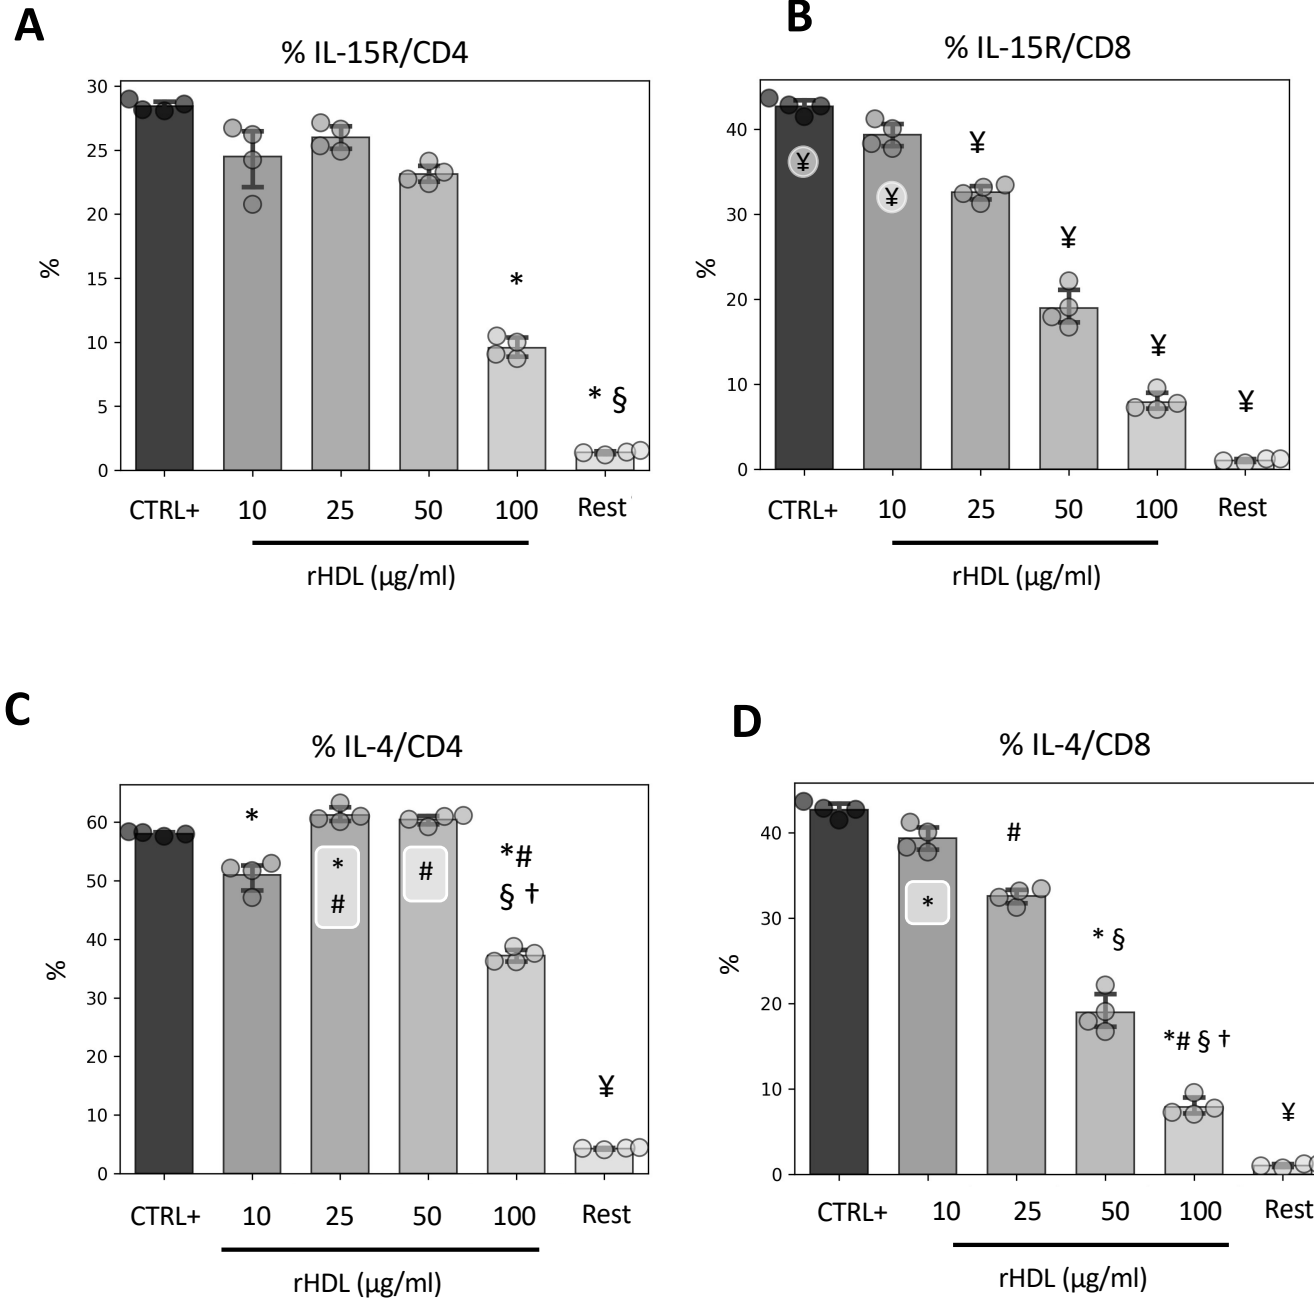

**Impact of rHDL on IL15R and IL-4 production in T cells.**

Percentage of activated CD4+ or CD8+ T cells from apoE KO mice expressing IL-15Ra, an indicator of IL-15 production as this interleukin is retained inside the cell and only secreted in complex with IL-15Ra, (CD4 Panel A, and CD8 Panel B) or IL-4 (CD4 Panel C, and CD8 Panel D) T following incubation with rHDL (0, 10, 25, 50 and 100 µg/ml). Data for resting (rest) T cells are also presented (last column of each graph).

P < 0.05: \* vs CTRL+; # vs 10; § vs 25; † vs 50; ‡ vs 100; ¥: vs everything else. Exact adjusted p-values are shown in Table S1.

**Figure S15**

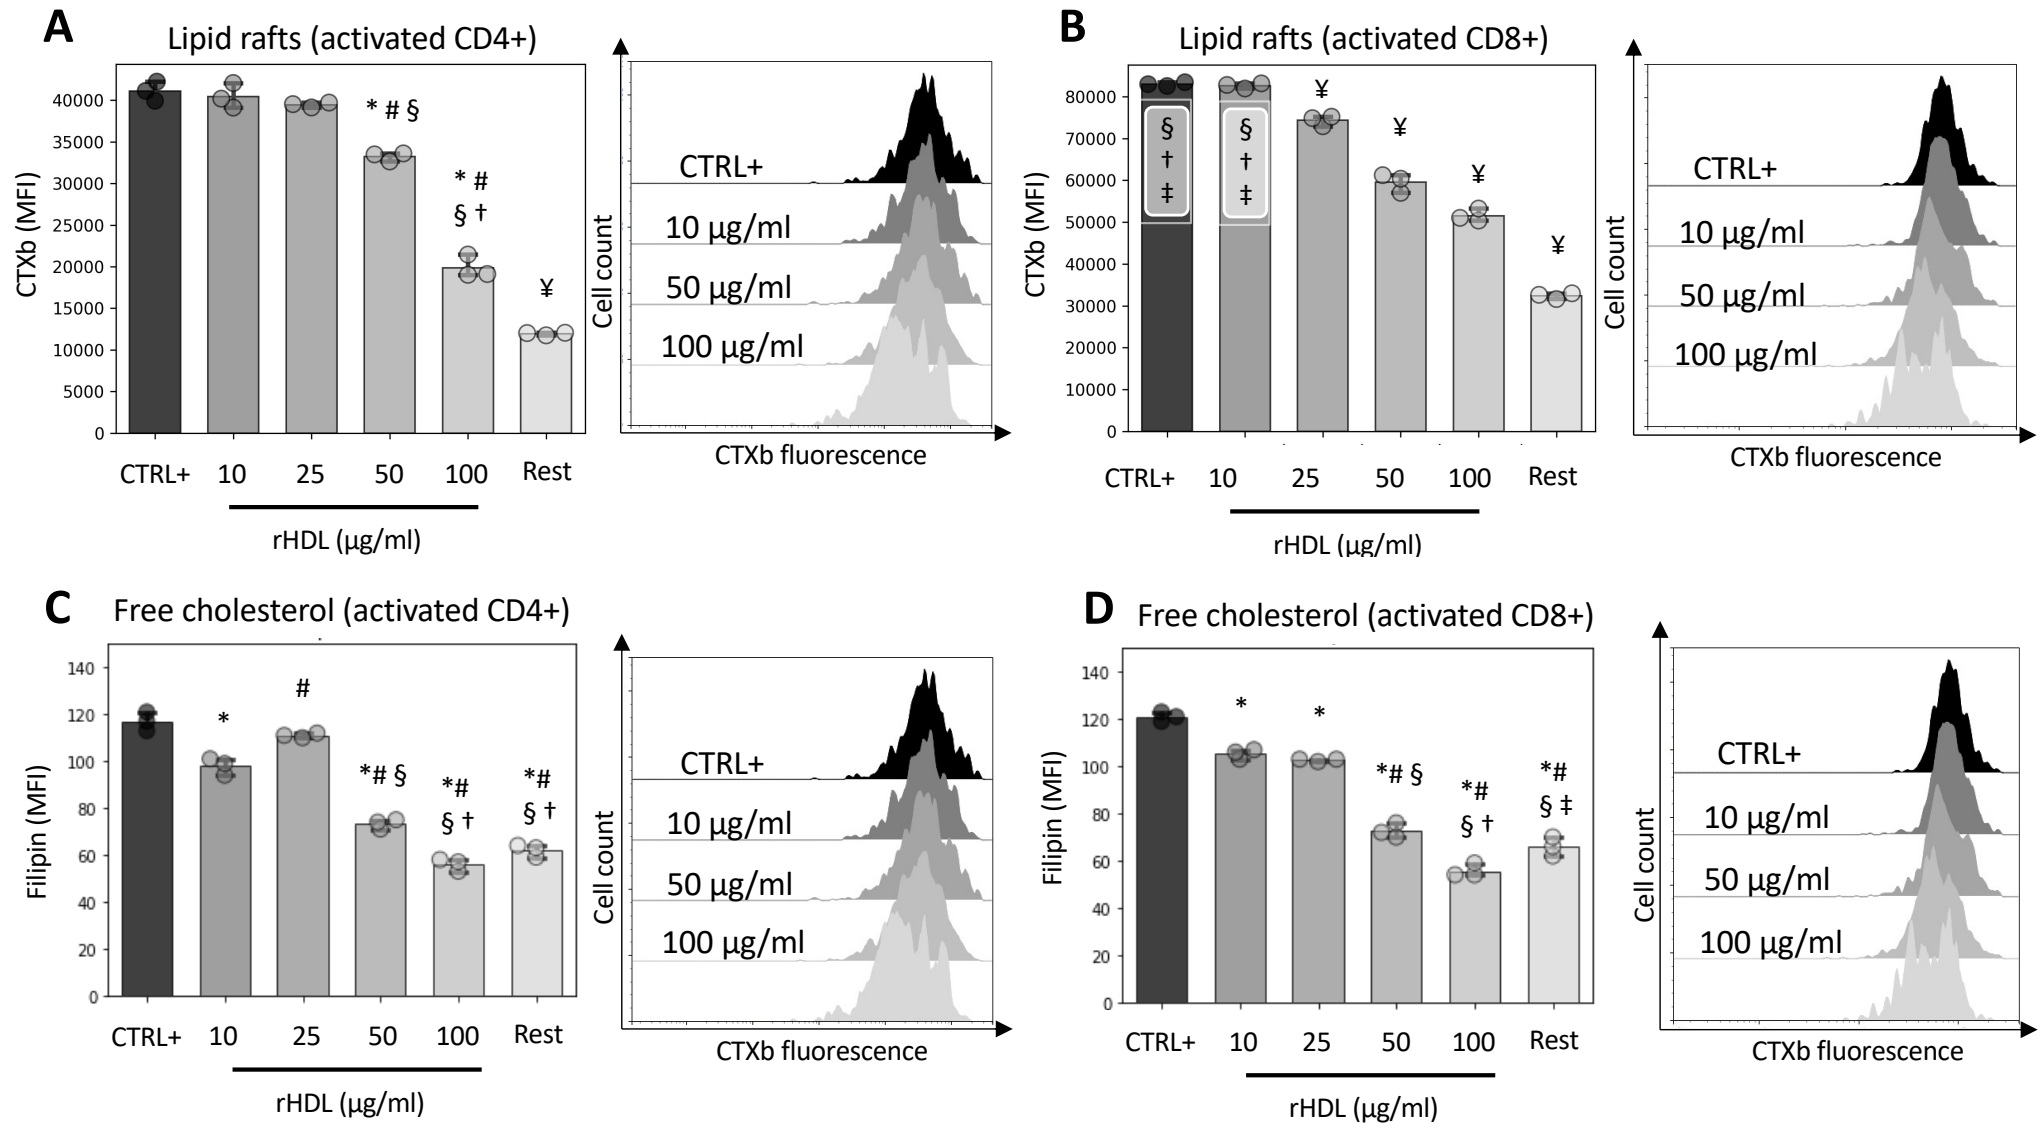

**ApoA-I reduces lipid rafts and cholesterol abundance in T cells.**

Cholera toxin-subunit B (CTXb, ligand of gangliosides enriched in lipid rafts) staining in activated CD4+ (A) and CD8+ (B) T cells from apoE KO mice following incubation with rHDL (0, 10, 25, 50 and 100 µg/ml). Data for resting (rest) T cells are also presented (last column of each graph). Representative histograms from flow cytometry analysis are shown.

Filipin staining (a marker of free cholesterol content) in activated CD4+ (C) and CD8+ (D) T cells from apoE KO mice following incubation with rHDL (0, 10, 25, 50 and 100 µg/ml). Data for resting (rest) T cells are also presented. Representative histograms from flow cytometry analysis are shown. MFI: mean fluorescence intensity. P < 0.05: \* vs CTRL+; # vs 10; § vs 25; † vs 50; ‡ vs 100; ¥: vs everything else. Exact adjusted p-values are shown in Table S1.



**Figure S16**

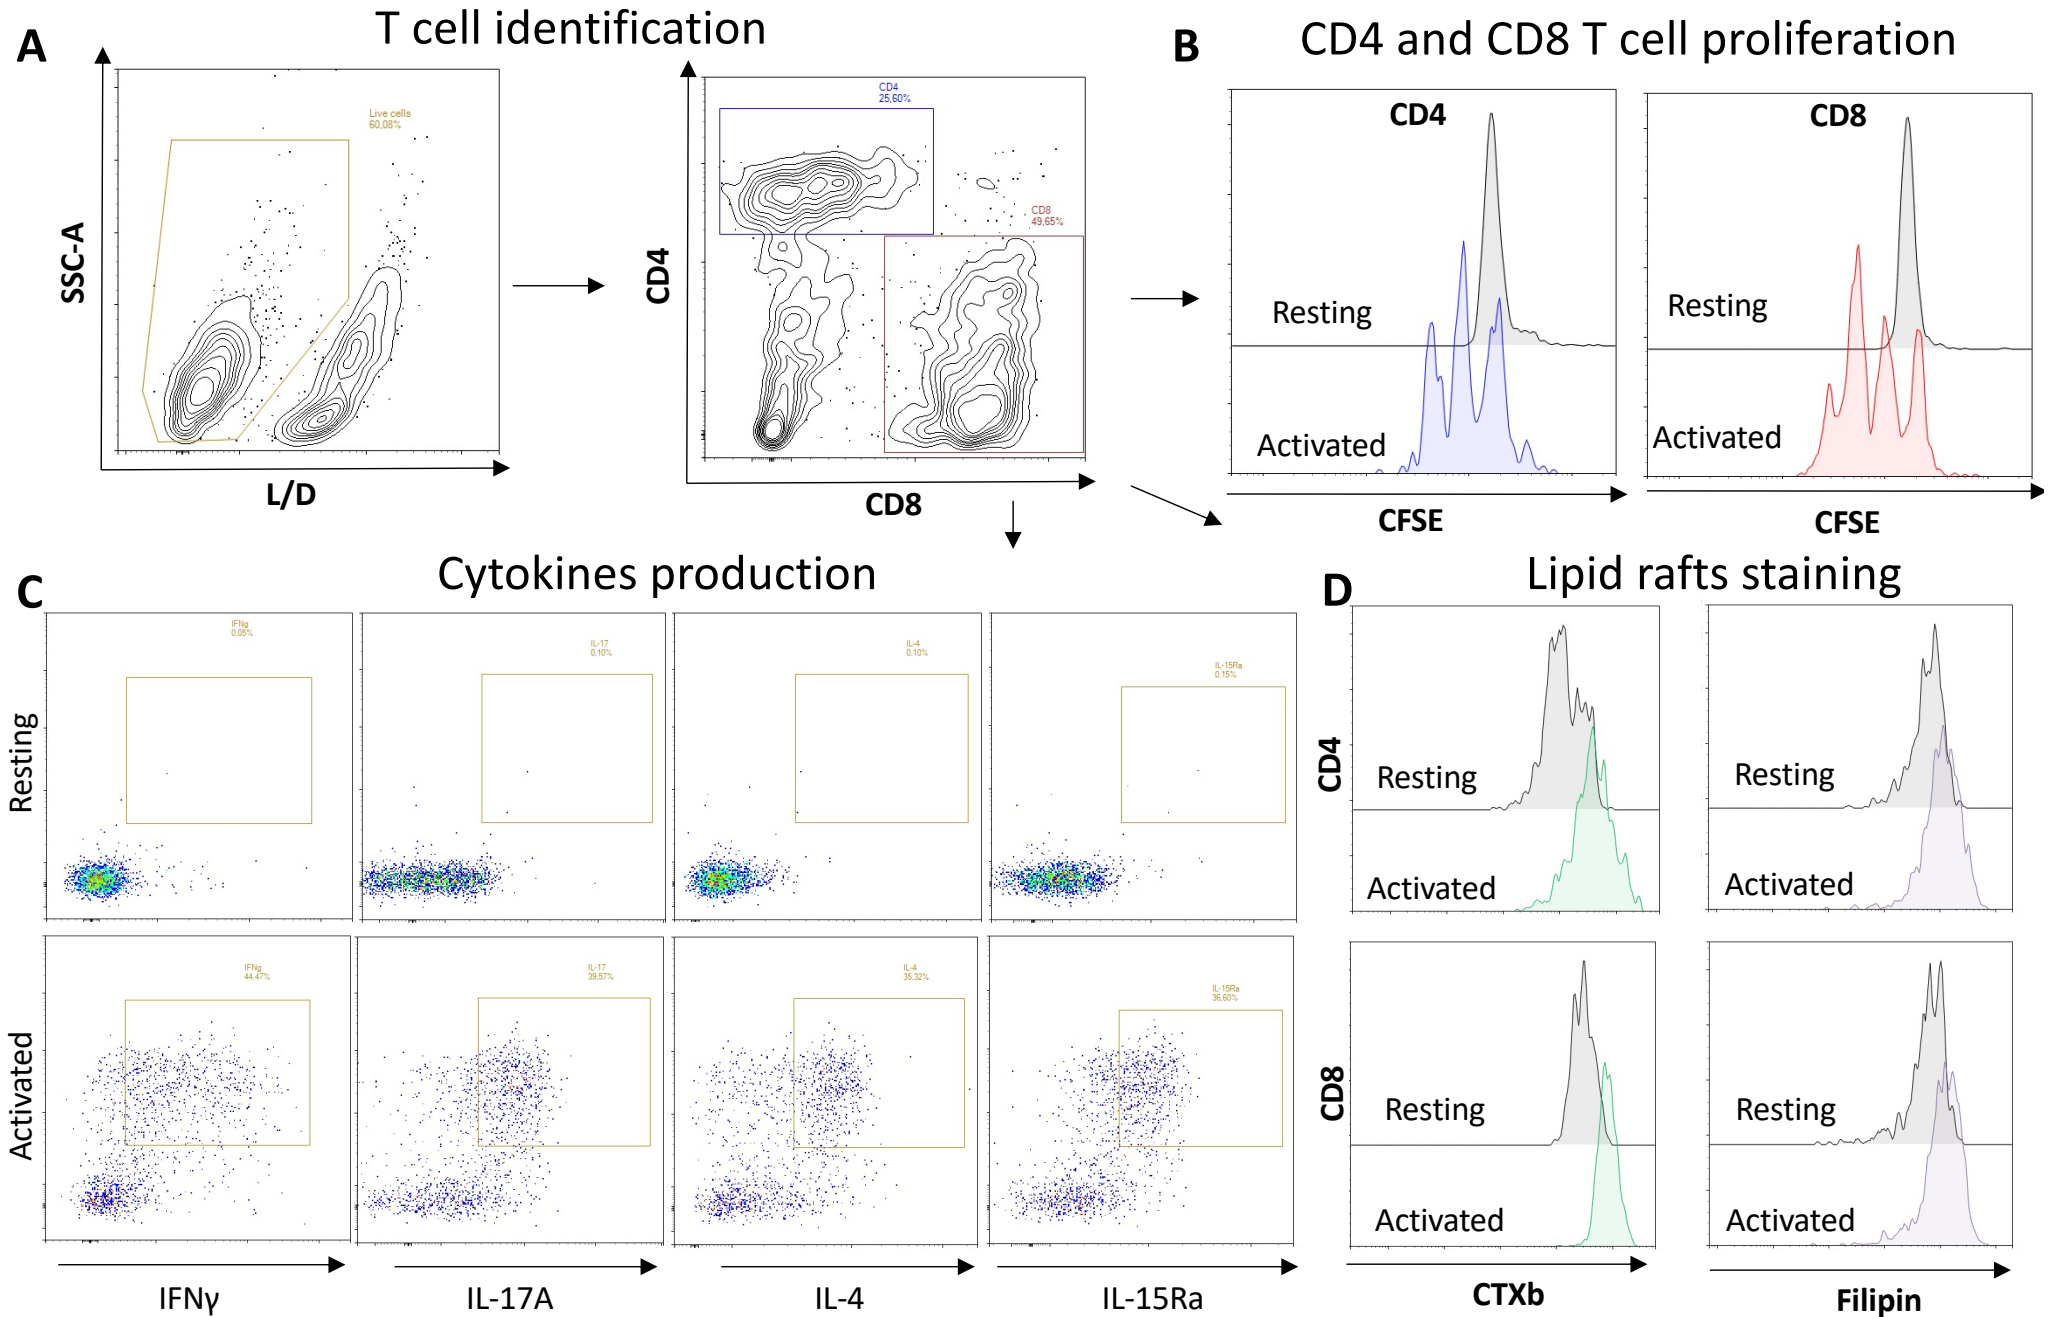

**Gating strategy for flow cytometry analysis.** **A** - Live cells were discriminated as negative for live/dead staining and identified as CD4+ or CD8+ T cells; **B** - CD4+ and CD8+ T proliferation was evaluated by tracking CFSE dilution in resting and activated T cells; **C** - Cytokines production was detected by intracellular staining for IFN $\gamma$ , IL-17A, IL-4 and IL-15Ra in resting and activated T cells; **D** - Stainings for Cholera toxin subunit B (CTXb) and filipin were performed in resting and activated CD4+ and CD8+ T cells.

Table S1

|                  |                                         |                    |                    |                  |                  |                  |
|------------------|-----------------------------------------|--------------------|--------------------|------------------|------------------|------------------|
| <b>Figure 1A</b> | <b>Total Cholesterol</b>                |                    |                    |                  |                  |                  |
|                  | <b>ANOVA + Tukey's</b>                  |                    |                    |                  |                  |                  |
|                  | Tukey's multiple comparisons test       | Mean Diff,         | 95,00% CI of diff, | Below threshold? | Summary          | Adjusted P Value |
|                  | WT vs. EKO                              | -248.5             | -281,3 to -215,7   | Yes              | ****             | <0,00000001      |
|                  | WT vs. DKO/hA-I                         | -217               | -249,8 to -184,2   | Yes              | ****             | <0,00000001      |
|                  | WT vs. DKO                              | -18.52             | -51,31 to 14,28    | No               | ns               | 0.42728105       |
|                  | EKO vs. DKO/hA-I                        | 31.5               | -1,300 to 64,29    | No               | ns               | 0.06324018       |
| EKO vs. DKO      | 230                                     | 197,2 to 262,8     | Yes                | ****             | <0,00000001      |                  |
| DKO/hA-I vs. DKO | 198.5                                   | 165,7 to 231,3     | Yes                | ****             | <0,00000001      |                  |
| <b>Figure 1B</b> | <b>Plasma apoA-I</b>                    |                    |                    |                  |                  |                  |
|                  | <b>Welch's ANOVA +Dunnnett's</b>        |                    |                    |                  |                  |                  |
|                  | Dunnnett's T3 multiple comparisons test | Mean Diff.         | 95.00% CI of diff. | Below threshold? | Summary          | Adjusted P Value |
|                  | WT vs. EKO                              | 46.87              | 36.37 to 57.37     | Yes              | ****             | <0.0001          |
| WT vs. DKOp      | -56.87                                  | -91.38 to -22.35   | Yes                | **               | 0.0014           |                  |
| EKO vs. DKOp     | -103.7                                  | -138.3 to -69.20   | Yes                | ****             | <0.0001          |                  |
| <b>Figure 1C</b> | <b>Plasma HDL-C</b>                     |                    |                    |                  |                  |                  |
|                  | <b>ANOVA + Tukey's</b>                  |                    |                    |                  |                  |                  |
|                  | Tukey's multiple comparisons test       | Mean Diff,         | 95,00% CI of diff, | Below threshold? | Summary          | Adjusted P Value |
|                  | WT vs. EKO                              | 55.65              | 45,54 to 65,75     | Yes              | ****             | <0,00000001      |
|                  | WT vs. DKO/hA-I                         | 18.12              | 8,022 to 28,22     | Yes              | ***              | 0.00020413       |
|                  | WT vs. DKO                              | 75.47              | 65,37 to 85,57     | Yes              | ****             | <0,00000001      |
|                  | EKO vs. DKO/hA-I                        | -37.52             | -47,62 to -27,42   | Yes              | ****             | <0,00000001      |
| EKO vs. DKO      | 19.82                                   | 9,723 to 29,92     | Yes                | ****             | 0.00005889       |                  |
| DKO/hA-I vs. DKO | 57.35                                   | 47,25 to 67,45     | Yes                | ****             | <0,00000001      |                  |
| <b>Text</b>      | <b>Plasma NON HDL-C</b>                 |                    |                    |                  |                  |                  |
|                  | <b>ANOVA + Tukey's</b>                  |                    |                    |                  |                  |                  |
|                  | Tukey's multiple comparisons test       | Mean Diff,         | 95,00% CI of diff, | Below threshold? | Summary          | Adjusted P Value |
|                  | WT vs. EKO                              | -304.1             | -333,3 to -275,0   | Yes              | ****             | <0,00000001      |
|                  | WT vs. DKO/hA-I                         | -235.1             | -264,2 to -206,0   | Yes              | ****             | <0,00000001      |
|                  | WT vs. DKO                              | -93.99             | -123,1 to -64,88   | Yes              | ****             | <0,00000001      |
|                  | EKO vs. DKO/hA-I                        | 69.02              | 39,91 to 98,12     | Yes              | ****             | 0.00000297       |
| EKO vs. DKO      | 210.2                                   | 181,1 to 239,3     | Yes                | ****             | <0,00000001      |                  |
| DKO/hA-I vs. DKO | 141.1                                   | 112,0 to 170,2     | Yes                | ****             | <0,00000001      |                  |
| <b>Figure 2K</b> | <b>Aortic sinus plaque area</b>         |                    |                    |                  |                  |                  |
|                  | <b>Welch's ANOVA +Dunnnett's</b>        |                    |                    |                  |                  |                  |
|                  | Dunnnett's T3 multiple comparisons test | Mean Diff.         | 95,00% CI of diff. | Below threshold? | Summary          | Adjusted P Value |
|                  | WT vs. EKO                              | -291815            | -418782 to -164848 | Yes              | ***              | 0.0006           |
|                  | WT vs. DKOp                             | -32902             | -76228 to 10424    | No               | ns               | 0.0722           |
|                  | WT vs. DKOm                             | -545253            | -675156 to -415351 | Yes              | ****             | <0.0001          |
|                  | EKO vs. DKOp                            | 258913             | 135918 to 381908   | Yes              | ***              | 0.0005           |
| EKO vs. DKOm     | -253439                                 | -394156 to -112721 | Yes                | ***              | 0.0004           |                  |
| DKOp vs. DKOm    | -512351                                 | -637896 to -386806 | Yes                | ****             | <0.0001          |                  |
| <b>Figure 2L</b> | <b>Number of coronary plaques</b>       |                    |                    |                  |                  |                  |
|                  | <b>ANOVA + Tukey's</b>                  |                    |                    |                  |                  |                  |
|                  | Tukey's multiple comparisons test       | Mean Diff,         | 95,00% CI of diff, | Below threshold? | Summary          | Adjusted P Value |
|                  | WT vs. EKO                              | -4.588             | -8,249 to -0,9263  | Yes              | *                | 0.01191354       |
|                  | WT vs. DKO/hA-I                         | 0                  | -3,661 to 3,661    | No               | ns               | >0,99999999      |
|                  | WT vs. DKO                              | -8.282             | -11,94 to -4,620   | Yes              | ****             | 0.00004161       |
|                  | EKO vs. DKO/hA-I                        | 4.588              | 0,9263 to 8,249    | Yes              | *                | 0.01191354       |
| EKO vs. DKO      | -3.694                                  | -7,355 to -0,03279 | Yes                | *                | 0.04759952       |                  |
| DKO/hA-I vs. DKO | -8.282                                  | -11,94 to -4,620   | Yes                | ****             | 0.00004161       |                  |
| <b>Figure 2M</b> | <b>Coronary plaque length</b>           |                    |                    |                  |                  |                  |
|                  | <b>ANOVA + Tukey's</b>                  |                    |                    |                  |                  |                  |
|                  | Tukey's multiple comparisons test       | Mean Diff,         | 95,00% CI of diff, | Below threshold? | Summary          | Adjusted P Value |
|                  | WT vs. EKO                              | -200.7             | -300,7 to -100,7   | Yes              | ***              | 0.00016071       |
|                  | WT vs. DKO/hA-I                         | 0                  | -99,98 to 99,98    | No               | ns               | >0,99999999      |
|                  | WT vs. DKO                              | -229.7             | -329,7 to -129,7   | Yes              | ****             | 0.00003465       |
|                  | EKO vs. DKO/hA-I                        | 200.7              | 100,7 to 300,7     | Yes              | ***              | 0.00016071       |
| EKO vs. DKO      | -28.99                                  | -129,0 to 70,99    | No                 | ns               | 0.83968018       |                  |
| DKO/hA-I vs. DKO | -229.7                                  | -329,7 to -129,7   | Yes                | ****             | 0.00003465       |                  |
| <b>Figure 4A</b> | <b>Spleen weight</b>                    |                    |                    |                  |                  |                  |
|                  | <b>Kruskal-Wallis + Dunn's</b>          |                    |                    |                  |                  |                  |
|                  | Dunn's multiple comparisons test        | Mean rank diff,    | Significant?       | Summary          | Adjusted P Value |                  |
|                  | WT vs. EKO                              | -14.09             | No                 | ns               | 0.11922781       |                  |
|                  | WT vs. DKO/hA-I                         | 4.958              | No                 | ns               | >0,99999999      |                  |
|                  | WT vs. DKO                              | 0.3173             | No                 | ns               | >0,99999999      |                  |
|                  | EKO vs. DKO/hA-I                        | 19.05              | Yes                | **               | 0.00367468       |                  |
| EKO vs. DKO      | 14.41                                   | Yes                | *                  | 0.0494134        |                  |                  |
| DKO/hA-I vs. DKO | -4.641                                  | No                 | ns                 | >0,99999999      |                  |                  |
| <b>Figure 4B</b> | <b>Axillary lymph node weight</b>       |                    |                    |                  |                  |                  |
|                  | <b>Kruskal-Wallis + Dunn's</b>          |                    |                    |                  |                  |                  |
|                  | Dunn's multiple comparisons test        | Mean rank diff,    | Significant?       | Summary          | Adjusted P Value |                  |
|                  | WT vs. EKO                              | -14.75             | No                 | ns               | 0.0885624        |                  |
|                  | WT vs. DKO/hA-I                         | -13.29             | No                 | ns               | 0.07636121       |                  |
|                  | WT vs. DKO                              | -28.25             | Yes                | ****             | 0.00000045       |                  |
|                  | EKO vs. DKO/hA-I                        | 1.458              | No                 | ns               | >0,99999999      |                  |
| EKO vs. DKO      | -13.5                                   | No                 | ns                 | 0.0825309        |                  |                  |
| DKO/hA-I vs. DKO | -14.96                                  | Yes                | **                 | 0.00833983       |                  |                  |

|                  |                                              |                 |                    |                  |                  |                  |
|------------------|----------------------------------------------|-----------------|--------------------|------------------|------------------|------------------|
| <b>Figure 4F</b> | <b>ORO positive area axillary lymph node</b> |                 |                    |                  |                  |                  |
|                  | <b>ANOVA + Tukey's</b>                       |                 |                    |                  |                  |                  |
|                  | Tukey's multiple comparisons test            | Mean Diff,      | 95,00% CI of diff, | Below threshold? | Summary          | Adjusted P Value |
|                  | WT vs. EKO                                   | -2.106          | -8,289 to 4,076    | No               | ns               | 0.77870738       |
|                  | WT vs. DKO/hA-I                              | -0.389          | -6,346 to 5,568    | No               | ns               | 0.99778903       |
|                  | WT vs. DKO                                   | -13.06          | -19,24 to -6,873   | Yes              | ****             | 0.00004254       |
|                  | EKO vs. DKO/hA-I                             | 1.717           | -4,240 to 7,675    | No               | ns               | 0.85201309       |
|                  | EKO vs. DKO                                  | -10.95          | -17,13 to -4,766   | Yes              | ***              | 0.0003774        |
|                  | DKO/hA-I vs. DKO                             | -12.67          | -18,62 to -6,709   | Yes              | ****             | 0.00003885       |
| <b>Figure 5A</b> | <b>% CD4 N Blood</b>                         |                 |                    |                  |                  |                  |
|                  | <b>ANOVA + Tukey's</b>                       |                 |                    |                  |                  |                  |
|                  | Tukey's multiple comparisons test            | Mean Diff,      | 95,00% CI of diff, | Below threshold? | Summary          | Adjusted P Value |
|                  | WT vs. EKO                                   | 14.71           | -3,498 to 32,91    | No               | ns               | 0.14881276       |
|                  | WT vs. DKO/hA-I                              | 18.92           | 2,450 to 35,38     | Yes              | *                | 0.019178         |
|                  | WT vs. DKO                                   | 43.07           | 27,10 to 59,03     | Yes              | ****             | 0.00000011       |
|                  | EKO vs. DKO/hA-I                             | 4.21            | -12,26 to 20,68    | No               | ns               | 0.89997618       |
|                  | EKO vs. DKO                                  | 28.36           | 12,39 to 44,33     | Yes              | ***              | 0.00017725       |
|                  | DKO/hA-I vs. DKO                             | 24.15           | 10,20 to 38,10     | Yes              | ***              | 0.00025379       |
| <b>Figure 5B</b> | <b>% CD4 EM Blood</b>                        |                 |                    |                  |                  |                  |
|                  | <b>ANOVA + Tukey's</b>                       |                 |                    |                  |                  |                  |
|                  | Tukey's multiple comparisons test            | Mean Diff,      | 95,00% CI of diff, | Below threshold? | Summary          | Adjusted P Value |
|                  | WT vs. EKO                                   | -10.89          | -26,17 to 4,396    | No               | ns               | 0.23725878       |
|                  | WT vs. DKO/hA-I                              | -13.5           | -27,33 to 0,3231   | No               | ns               | 0.05764329       |
|                  | WT vs. DKO                                   | -33.12          | -46,52 to -19,71   | Yes              | ****             | 0.00000068       |
|                  | EKO vs. DKO/hA-I                             | -2.614          | -16,44 to 11,21    | No               | ns               | 0.95599853       |
|                  | EKO vs. DKO                                  | -22.23          | -35,64 to -8,824   | Yes              | ***              | 0.00044952       |
|                  | DKO/hA-I vs. DKO                             | -19.62          | -31,33 to -7,901   | Yes              | ***              | 0.00039589       |
| <b>Figure 5C</b> | <b>% CD4 CM Blood</b>                        |                 |                    |                  |                  |                  |
|                  | <b>Kruskal-Wallis + Dunn's</b>               |                 |                    |                  |                  |                  |
|                  | Dunn's multiple comparisons test             | Mean rank diff, | Significant?       | Summary          | Adjusted P Value |                  |
|                  | WT vs. EKO                                   | -0.2857         | No                 | ns               | >0,99999999      |                  |
|                  | WT vs. DKO/hA-I                              | -11.52          | No                 | ns               | 0.1922359        |                  |
|                  | WT vs. DKO                                   | -10.35          | No                 | ns               | 0.28158347       |                  |
|                  | EKO vs. DKO/hA-I                             | -11.23          | No                 | ns               | 0.21930571       |                  |
|                  | EKO vs. DKO                                  | -10.07          | No                 | ns               | 0.32009386       |                  |
|                  | DKO/hA-I vs. DKO                             | 1.168           | No                 | ns               | >0,99999999      |                  |
| <b>Figure 5D</b> | <b>% CD4 N Spleen</b>                        |                 |                    |                  |                  |                  |
|                  | <b>ANOVA + Tukey's</b>                       |                 |                    |                  |                  |                  |
|                  | Tukey's multiple comparisons test            | Mean Diff,      | 95,00% CI of diff, | Below threshold? | Summary          | Adjusted P Value |
|                  | WT vs. EKO                                   | 12.84           | 1,886 to 23,80     | Yes              | *                | 0.01670787       |
|                  | WT vs. DKO/hA-I                              | 21.22           | 11,18 to 31,27     | Yes              | ****             | 0.00001627       |
|                  | WT vs. DKO                                   | 32.16           | 21,87 to 42,45     | Yes              | ****             | 0.00000001       |
|                  | EKO vs. DKO/hA-I                             | 8.38            | -2,053 to 18,81    | No               | ns               | 0.15084634       |
|                  | EKO vs. DKO                                  | 19.32           | 8,648 to 29,99     | Yes              | ***              | 0.00016262       |
|                  | DKO/hA-I vs. DKO                             | 10.94           | 1,209 to 20,66     | Yes              | *                | 0.02287739       |
| <b>Figure 5E</b> | <b>% CD4 EM Spleen</b>                       |                 |                    |                  |                  |                  |
|                  | <b>ANOVA + Tukey's</b>                       |                 |                    |                  |                  |                  |
|                  | Tukey's multiple comparisons test            | Mean Diff,      | 95,00% CI of diff, | Below threshold? | Summary          | Adjusted P Value |
|                  | WT vs. EKO                                   | -9.806          | -24,09 to 4,475    | No               | ns               | 0.26334662       |
|                  | WT vs. DKO/hA-I                              | -21.43          | -34,52 to -8,343   | Yes              | ***              | 0.00060017       |
|                  | WT vs. DKO                                   | -34.03          | -47,44 to -20,62   | Yes              | ****             | 0.00000068       |
|                  | EKO vs. DKO/hA-I                             | -11.63          | -25,22 to 1,973    | No               | ns               | 0.11495074       |
|                  | EKO vs. DKO                                  | -24.22          | -38,13 to -10,32   | Yes              | ***              | 0.00027346       |
|                  | DKO/hA-I vs. DKO                             | -12.6           | -25,28 to 0,08111  | Yes              | *                | 0.04997055       |
| <b>Figure 5F</b> | <b>% CD4 CM Spleen</b>                       |                 |                    |                  |                  |                  |
|                  | <b>ANOVA + Tukey's</b>                       |                 |                    |                  |                  |                  |
|                  | Tukey's multiple comparisons test            | Mean Diff,      | 95,00% CI of diff, | Below threshold? | Summary          | Adjusted P Value |
|                  | WT vs. EKO                                   | -1.066          | -4,810 to 2,679    | No               | ns               | 0.86565008       |
|                  | WT vs. DKO/hA-I                              | -1.855          | -5,287 to 1,577    | No               | ns               | 0.46754166       |
|                  | WT vs. DKO                                   | -0.7368         | -4,252 to 2,779    | No               | ns               | 0.94026456       |
|                  | EKO vs. DKO/hA-I                             | -0.7897         | -4,355 to 2,776    | No               | ns               | 0.93054485       |
|                  | EKO vs. DKO                                  | 0.3287          | -3,317 to 3,975    | No               | ns               | 0.99470894       |
|                  | DKO/hA-I vs. DKO                             | 1.118           | -2,206 to 4,443    | No               | ns               | 0.79710676       |
| <b>Figure 5G</b> | <b>% CD4 N Lymph node</b>                    |                 |                    |                  |                  |                  |
|                  | <b>ANOVA + Tukey's</b>                       |                 |                    |                  |                  |                  |
|                  | Tukey's multiple comparisons test            | Mean Diff,      | 95,00% CI of diff, | Below threshold? | Summary          | Adjusted P Value |
|                  | WT vs. EKO                                   | 9.716           | -11,32 to 30,75    | No               | ns               | 0.59716251       |
|                  | WT vs. DKO/hA-I                              | 14.96           | -4,225 to 34,15    | No               | ns               | 0.16976379       |
|                  | WT vs. DKO                                   | 22.69           | 3,168 to 42,22     | Yes              | *                | 0.01783477       |
|                  | EKO vs. DKO/hA-I                             | 5.248           | -13,03 to 23,53    | No               | ns               | 0.86263774       |
|                  | EKO vs. DKO                                  | 12.98           | -5,656 to 31,61    | No               | ns               | 0.25213376       |
|                  | DKO/hA-I vs. DKO                             | 7.728           | -8,791 to 24,25    | No               | ns               | 0.58725915       |
| <b>Figure 5H</b> | <b>% CD4 EM Lymph node</b>                   |                 |                    |                  |                  |                  |
|                  | <b>ANOVA + Tukey's</b>                       |                 |                    |                  |                  |                  |
|                  | Tukey's multiple comparisons test            | Mean Diff,      | 95,00% CI of diff, | Below threshold? | Summary          | Adjusted P Value |
|                  | WT vs. EKO                                   | -4.744          | -21,47 to 11,99    | No               | ns               | 0.86755454       |
|                  | WT vs. DKO/hA-I                              | -8.721          | -23,98 to 6,541    | No               | ns               | 0.42062802       |
|                  | WT vs. DKO                                   | -21.83          | -37,09 to -6,565   | Yes              | **               | 0.00271432       |
|                  | EKO vs. DKO/hA-I                             | -3.978          | -18,52 to 10,56    | No               | ns               | 0.8791265        |
|                  | EKO vs. DKO                                  | -17.08          | -31,62 to -2,544   | Yes              | *                | 0.01630279       |

|                                  |                                              |                 |                           |                  |                  |                  |
|----------------------------------|----------------------------------------------|-----------------|---------------------------|------------------|------------------|------------------|
|                                  | DKO/hA-I vs. DKO                             | -13.11          | -25,93 to -0,2832         | Yes              | *                | 0.04367608       |
| <b>Figure 5I</b>                 | <b>% CD4 CM Lymph node</b>                   |                 |                           |                  |                  |                  |
|                                  | <b>Kruskal-Wallis + Dunn's</b>               |                 |                           |                  |                  |                  |
|                                  | Dunn's multiple comparisons test             | Mean rank diff, | Significant?              | Summary          | Adjusted P Value |                  |
|                                  | WT vs. EKO                                   | -11.05          | No                        | ns               | 0.31572741       |                  |
|                                  | WT vs. DKO/hA-I                              | -10.61          | No                        | ns               | 0.24836251       |                  |
|                                  | WT vs. DKO                                   | -10.47          | No                        | ns               | 0.26447247       |                  |
|                                  | EKO vs. DKO/hA-I                             | 0.4416          | No                        | ns               | >0,99999999      |                  |
|                                  | EKO vs. DKO                                  | 0.5779          | No                        | ns               | >0,99999999      |                  |
|                                  | DKO/hA-I vs. DKO                             | 0.1364          | No                        | ns               | >0,99999999      |                  |
| <b>Supplementary Figure IA</b>   | <b>Body weight</b>                           |                 |                           |                  |                  |                  |
|                                  | <b>ANOVA + Tukey's</b>                       |                 |                           |                  |                  |                  |
|                                  | Tukey's multiple comparisons test            | Mean Diff,      | 95,00% CI of diff,        | Below threshold? | Summary          | Adjusted P Value |
|                                  | WT vs. EKO                                   | -5.2            | -8,156 to -2,244          | Yes              | ***              | 0.00044116       |
|                                  | WT vs. DKO/hA-I                              | -1.6            | -4,557 to 1,356           | No               | ns               | 0.4474289        |
|                                  | WT vs. DKO                                   | -2.09           | -5,047 to 0,8659          | No               | ns               | 0.22881859       |
|                                  | EKO vs. DKO/hA-I                             | 3.6             | 0,6432 to 6,556           | Yes              | *                | 0.01364612       |
|                                  | EKO vs. DKO                                  | 3.11            | 0,1532 to 6,066           | Yes              | *                | 0.03703952       |
|                                  | DKO/hA-I vs. DKO                             | -0.49           | -3,446 to 2,466           | No               | ns               | 0.96606468       |
| <b>Supplementary Figure IB</b>   | <b>Spleen weight / Body weight ratio</b>     |                 |                           |                  |                  |                  |
|                                  | <b>ANOVA + Tukey's</b>                       |                 |                           |                  |                  |                  |
|                                  | Tukey's multiple comparisons test            | Mean Diff,      | 95,00% CI of diff,        | Below threshold? | Summary          | Adjusted P Value |
|                                  | WT vs. EKO                                   | -0.001051       | -0,002271 to 0,0001702    | No               | ns               | 0.10763235       |
|                                  | WT vs. DKO/hA-I                              | 0.0001609       | -0,001060 to 0,001382     | No               | ns               | 0.982352         |
|                                  | WT vs. DKO                                   | 0.00003604      | -0,001185 to 0,001257     | No               | ns               | 0.99979039       |
|                                  | EKO vs. DKO/hA-I                             | 0.001211        | -9,292e-006 to 0,002432   | No               | ns               | 0.05222043       |
|                                  | EKO vs. DKO                                  | 0.001087        | -0,0001342 to 0,002307    | No               | ns               | 0.0920161        |
|                                  | DKO/hA-I vs. DKO                             | -0.0001249      | -0,001346 to 0,001096     | No               | ns               | 0.99156132       |
| <b>Supplementary Figure IC</b>   | <b>Lymph node weight / Body weight ratio</b> |                 |                           |                  |                  |                  |
|                                  | <b>Welch's ANOVA +Dunnett's</b>              |                 |                           |                  |                  |                  |
|                                  | Dunnett's T3 multiple comparisons test       | Mean Diff.      | 95.00% CI of diff.        | Below threshold? | Summary          | Adjusted P Value |
|                                  | WT vs. EKO                                   | -0.000226       | -0,0007021 to 0,0002501   | No               | ns               | 0.2989           |
|                                  | WT vs. DKOp                                  | -0.0001365      | -0,0002016 to -7,147e-005 | Yes              | ***              | 0.0009           |
|                                  | WT vs. DKOm                                  | -0.0006982      | -0,001335 to -6,128e-005  | Yes              | *                | 0.0171           |
|                                  | EKO vs. DKOp                                 | 0.00008951      | -0,0003910 to 0,0005700   | No               | ns               | 0.9245           |
|                                  | EKO vs. DKOm                                 | -0.0004722      | -0,001105 to 0,0001610    | No               | ns               | 0.1061           |
|                                  | DKOp vs. DKOm                                | -0.0005617      | -0,001202 to 7,851e-005   | Yes              | *                | 0.0421           |
| <b>Supplementary Figure IIE</b>  | <b>Macrophage area (%)</b>                   |                 |                           |                  |                  |                  |
|                                  | <b>ANOVA + Tukey's</b>                       |                 |                           |                  |                  |                  |
|                                  | Tukey's multiple comparisons test            | Mean Diff,      | 95,00% CI of diff,        | Below threshold? | Summary          | Adjusted P Value |
|                                  | WT vs. EKO                                   | -22.2           | -35,79 to -8,609          | Yes              | ***              | 0.00098127       |
|                                  | WT vs. DKO/hA-I                              | -21.19          | -34,78 to -7,601          | Yes              | **               | 0.00157638       |
|                                  | WT vs. DKO                                   | -16.07          | -29,66 to -2,481          | Yes              | *                | 0.0169197        |
|                                  | EKO vs. DKO/hA-I                             | 1.008           | -12,58 to 14,60           | No               | ns               | 0.99672583       |
|                                  | EKO vs. DKO                                  | 6.128           | -7,463 to 19,72           | No               | ns               | 0.59645546       |
|                                  | DKO/hA-I vs. DKO                             | 5.12            | -8,472 to 18,71           | No               | ns               | 0.72024786       |
| <b>Supplementary Figure IIF</b>  | <b>Macrophage area</b>                       |                 |                           |                  |                  |                  |
|                                  | <b>ANOVA + Tukey's</b>                       |                 |                           |                  |                  |                  |
|                                  | Tukey's multiple comparisons test            | Mean Diff,      | 95,00% CI of diff,        | Below threshold? | Summary          | Adjusted P Value |
|                                  | WT vs. EKO                                   | -70510          | -124378 to -16643         | Yes              | **               | 0.00772691       |
|                                  | WT vs. DKO/hA-I                              | -7804           | -61672 to 46063           | No               | ns               | 0.97684746       |
|                                  | WT vs. DKO                                   | -90234          | -144101 to -36366         | Yes              | ***              | 0.00075218       |
|                                  | EKO vs. DKO/hA-I                             | 62706           | 8839 to 116574            | Yes              | *                | 0.01893913       |
|                                  | EKO vs. DKO                                  | -19723          | -73591 to 34144           | No               | ns               | 0.73714041       |
|                                  | DKO/hA-I vs. DKO                             | -82429          | -136297 to -28562         | Yes              | **               | 0.00189757       |
| <b>Supplementary Figure IIIE</b> | <b>CD3+ lymphocytes plaque</b>               |                 |                           |                  |                  |                  |
|                                  | <b>Kruskal-Wallis + Dunn's</b>               |                 |                           |                  |                  |                  |
|                                  | Dunn's multiple comparisons test             | Mean rank diff, | Significant?              | Summary          | Adjusted P Value |                  |
|                                  | WT vs. EKO                                   | -11.67          | Yes                       | *                | 0.02064806       |                  |
|                                  | WT vs. DKO/hA-I                              | -5              | No                        | ns               | >0,99999999      |                  |
|                                  | WT vs. DKO                                   | -15.33          | Yes                       | ***              | 0.00072429       |                  |
|                                  | EKO vs. DKO/hA-I                             | 6.667           | No                        | ns               | 0.56762546       |                  |
|                                  | EKO vs. DKO                                  | -3.667          | No                        | ns               | >0,99999999      |                  |
|                                  | DKO/hA-I vs. DKO                             | -10.33          | Yes                       | *                | 0.04742317       |                  |
| <b>Supplementary Figure IIIF</b> | <b>CD3+ lymphocytes plaque normalized</b>    |                 |                           |                  |                  |                  |
|                                  | <b>ANOVA + Tukey's</b>                       |                 |                           |                  |                  |                  |
|                                  | Tukey's multiple comparisons test            | Mean Diff,      | 95,00% CI of diff,        | Below threshold? | Summary          | Adjusted P Value |
|                                  | WT vs. EKO                                   | -1.657          | -4,205 to 0,8912          | No               | ns               | 0.29347685       |
|                                  | WT vs. DKO/hA-I                              | -2.45           | -4,999 to 0,09787         | No               | ns               | 0.06214867       |
|                                  | WT vs. DKO                                   | -2.029          | -4,577 to 0,5196          | No               | ns               | 0.14972924       |
|                                  | EKO vs. DKO/hA-I                             | -0.7933         | -3,342 to 1,755           | No               | ns               | 0.81944933       |
|                                  | EKO vs. DKO                                  | -0.3716         | -2,920 to 2,177           | No               | ns               | 0.9764176        |
|                                  | DKO/hA-I vs. DKO                             | 0.4218          | -2,126 to 2,970           | No               | ns               | 0.96620105       |

## Supplementary

## Figure III G

## D3+ lymphocytes around the aortic sinus

## ANOVA + Tukey's

| Tukey's multiple comparisons test | Mean Diff, | 95,00% CI of diff, | Below threshold? | Summary | Adjusted P Value |
|-----------------------------------|------------|--------------------|------------------|---------|------------------|
| WT vs. EKO                        | -24.45     | -32,67 to -16,22   | Yes              | ****    | 0.00000036       |
| WT vs. DKO/hA-I                   | -8.5       | -16,72 to -0,2776  | Yes              | *       | 0.04115602       |
| WT vs. DKO                        | -25        | -33,22 to -16,78   | Yes              | ****    | 0.00000025       |
| EKO vs. DKO/hA-I                  | 15.95      | 7,724 to 24,17     | Yes              | ***     | 0.00014141       |
| EKO vs. DKO                       | -0.5534    | -8,776 to 7,669    | No               | ns      | 0.99754764       |
| DKO/hA-I vs. DKO                  | -16.5      | -24,72 to -8,278   | Yes              | ****    | 0.000093         |

## Supplementary

## Figure VE

## Dermal thickness

## ANOVA + Tukey's

| Tukey's multiple comparisons test | Mean Diff, | 95,00% CI of diff, | Below threshold? | Summary | Adjusted P Value |
|-----------------------------------|------------|--------------------|------------------|---------|------------------|
| WT vs. EKO                        | -41.28     | -94,33 to 11,78    | No               | ns      | 0.16741871       |
| WT vs. DKO/hA-I                   | -38.09     | -91,14 to 14,96    | No               | ns      | 0.2230497        |
| WT vs. DKO                        | -724.4     | -777,4 to -671,3   | Yes              | ****    | <0,00000001      |
| EKO vs. DKO/hA-I                  | 3.186      | -49,87 to 56,24    | No               | ns      | 0.99833584       |
| EKO vs. DKO                       | -683.1     | -736,1 to -630,0   | Yes              | ****    | <0,00000001      |
| DKO/hA-I vs. DKO                  | -686.3     | -739,3 to -633,2   | Yes              | ****    | <0,00000001      |

## Supplementary

## Figure VF

## Dermal ORO

## Kruskal-Wallis + Dunn's

| Dunn's multiple comparisons test | Mean rank diff, | Significant? | Summary | Adjusted P Value |
|----------------------------------|-----------------|--------------|---------|------------------|
| WT vs. EKO                       | -3.429          | No           | ns      | >0,99999999      |
| WT vs. DKO/hA-I                  | 0.8571          | No           | ns      | >0,99999999      |
| WT vs. DKO                       | -14.86          | Yes          | **      | 0.00436577       |
| EKO vs. DKO/hA-I                 | 4.286           | No           | ns      | >0,99999999      |
| EKO vs. DKO                      | -11.43          | Yes          | *       | 0.04606588       |
| DKO/hA-I vs. DKO                 | -15.71          | Yes          | **      | 0.00211029       |

## Supplementary

## Figure VIIIA

## CD45+ cells Blood

## Kruskal-Wallis + Dunn's

| Dunn's multiple comparisons test | Mean rank diff, | Significant? | Summary | Adjusted P Value |
|----------------------------------|-----------------|--------------|---------|------------------|
| WT vs. EKO                       | -1.2            | No           | ns      | >0,9999          |
| WT vs. DKO/hA-I                  | -3.057          | No           | ns      | >0,9999          |
| WT vs. DKO                       | -11.53          | Yes          | *       | 0.0299           |
| EKO vs. DKO/hA-I                 | -1.857          | No           | ns      | >0,9999          |
| EKO vs. DKO                      | -10.33          | No           | ns      | 0.0712           |
| DKO/hA-I vs. DKO                 | -8.476          | No           | ns      | 0.1481           |

## Supplementary

## Figure VIIIB

## CD45+ cells Spleen

## ANOVA + Tukey's

| Tukey's multiple comparisons test | Mean Diff, | 95,00% CI of diff, | Below threshold? | Summary | Adjusted P Value |
|-----------------------------------|------------|--------------------|------------------|---------|------------------|
| WT vs. EKO                        | 11250      | -29146 to 51646    | No               | ns      | 0.86116388       |
| WT vs. DKO/hA-I                   | 3890       | -33510 to 41289    | No               | ns      | 0.99100545       |
| WT vs. DKO                        | 4952       | -33724 to 43628    | No               | ns      | 0.98352924       |
| EKO vs. DKO/hA-I                  | -7361      | -44760 to 30039    | No               | ns      | 0.94447857       |
| EKO vs. DKO                       | -6298      | -44974 to 32378    | No               | ns      | 0.96725354       |
| DKO/hA-I vs. DKO                  | 1063       | -34472 to 36597    | No               | ns      | 0.99977888       |

## Supplementary

## Figure VIIIC

## CD45+ cells Lymph node

## ANOVA + Tukey's

| Tukey's multiple comparisons test | Mean Diff, | 95,00% CI of diff, | Below threshold? | Summary | Adjusted P Value |
|-----------------------------------|------------|--------------------|------------------|---------|------------------|
| WT vs. EKO                        | -538.7     | -19805 to 18728    | No               | ns      | 0.9998191        |
| WT vs. DKO/hA-I                   | -2059      | -19896 to 15778    | No               | ns      | 0.98780306       |
| WT vs. DKO                        | -18678     | -37124 to -231,9   | Yes              | *       | 0.04655067       |
| EKO vs. DKO/hA-I                  | -1520      | -19358 to 16317    | No               | ns      | 0.99498798       |
| EKO vs. DKO                       | -18139     | -36585 to 306,8    | Yes              | *       | 0.04992312       |
| DKO/hA-I vs. DKO                  | -16619     | -33567 to 329,1    | Yes              | *       | 0.04978933       |

## Supplementary

## Figure VIIID

## CD45+ cells Blood

## ANOVA + Tukey's

| Tukey's multiple comparisons test | Mean Diff, | 95,00% CI of diff, | Below threshold? | Summary | Adjusted P Value |
|-----------------------------------|------------|--------------------|------------------|---------|------------------|
| WT vs. EKO                        | 92.81      | -152,7 to 338,4    | No               | ns      | 0.71554463       |
| WT vs. DKO/hA-I                   | 38.83      | -188,5 to 266,2    | No               | ns      | 0.96255613       |
| WT vs. DKO                        | 11.65      | -223,4 to 246,8    | No               | ns      | 0.99899784       |
| EKO vs. DKO/hA-I                  | -53.98     | -281,3 to 173,4    | No               | ns      | 0.90794432       |
| EKO vs. DKO                       | -81.15     | -316,2 to 153,9    | No               | ns      | 0.76746846       |
| DKO/hA-I vs. DKO                  | -27.17     | -243,2 to 188,8    | No               | ns      | 0.98435537       |

## Supplementary

## Figure VIIIE

## CD45+ cells Spleen

## ANOVA + Tukey's

| Tukey's multiple comparisons test | Mean Diff, | 95,00% CI of diff, | Below threshold? | Summary | Adjusted P Value |
|-----------------------------------|------------|--------------------|------------------|---------|------------------|
| WT vs. EKO                        | 508.5      | -1284 to 2301      | No               | ns      | 0.85460828       |
| WT vs. DKO/hA-I                   | -346       | -2006 to 1314      | No               | ns      | 0.93503416       |
| WT vs. DKO                        | -221.3     | -1938 to 1495      | No               | ns      | 0.98319429       |
| EKO vs. DKO/hA-I                  | -854.5     | -2514 to 805,1     | No               | ns      | 0.48670166       |
| EKO vs. DKO                       | -729.8     | -2446 to 986,5     | No               | ns      | 0.63683648       |
| DKO/hA-I vs. DKO                  | 124.7      | -1452 to 1702      | No               | ns      | 0.99598693       |

**Supplementary  
Figure VIII D**

**CD45+ cells Lymph node  
ANOVA + Tukey's**

| Tukey's multiple comparisons test | Mean Diff, | 95,00% CI of diff, | Below threshold? | Summary | Adjusted P Value |
|-----------------------------------|------------|--------------------|------------------|---------|------------------|
| WT vs. EKO                        | 495.1      | -4085 to 5075      | No               | ns      | 0.9899302        |
| WT vs. DKO/hA-I                   | -36.82     | -4277 to 4204      | No               | ns      | 0.99999457       |
| WT vs. DKO                        | -3232      | -7617 to 1153      | No               | ns      | 0.1977574        |
| EKO vs. DKO/hA-I                  | -531.9     | -4772 to 3708      | No               | ns      | 0.98447751       |
| EKO vs. DKO                       | -3727      | -8112 to 657,9     | No               | ns      | 0.11312667       |
| DKO/hA-I vs. DKO                  | -3195      | -7224 to 833,7     | No               | ns      | 0.15094957       |

**Supplementary  
Figure IX A**

**% B1a lymphocytes spleen  
ANOVA + Tukey's**

| Tukey's multiple comparisons test | Mean Diff, | 95,00% CI of diff, | Below threshold? | Summary | Adjusted P Value |
|-----------------------------------|------------|--------------------|------------------|---------|------------------|
| WT vs. EKO                        | -4.208     | -10,05 to 1,631    | No               | ns      | 0.21343879       |
| WT vs. DKO/hA-I                   | 3.735      | -2,388 to 9,859    | No               | ns      | 0.34355326       |
| WT vs. DKO                        | 3.527      | -2,311 to 9,366    | No               | ns      | 0.35160026       |
| EKO vs. DKO/hA-I                  | 7.943      | 1,819 to 14,07     | Yes              | **      | 0.00851368       |
| EKO vs. DKO                       | 7.735      | 1,896 to 13,57     | Yes              | **      | 0.0071761        |
| DKO/hA-I vs. DKO                  | -0.208     | -6,332 to 5,916    | No               | ns      | 0.99967623       |

**Supplementary  
Figure IX B**

**% B1b lymphocytes spleen  
Welch's ANOVA +Dunnett's**

| Dunnett's T3 multiple comparisons test | Mean Diff. | 95.00% CI of diff. | Below threshold? | Summary | Adjusted P Value |
|----------------------------------------|------------|--------------------|------------------|---------|------------------|
| WT vs. EKO                             | -1.372     | -8.897 to 6.152    | No               | ns      | 0.9776           |
| WT vs. DKOp                            | -9.414     | -32.15 to 13.32    | No               | ns      | 0.4042           |
| WT vs. DKOm                            | -8.656     | -16.41 to -0.8996  | Yes              | *       | 0.0132           |
| EKO vs. DKOp                           | -8.041     | -33.12 to 17.04    | No               | ns      | 0.5207           |
| EKO vs. DKOm                           | -7.283     | -13.27 to -1.293   | Yes              | **      | 0.0073           |
| DKOp vs. DKOm                          | 0.758      | -21.32 to 22.83    | No               | ns      | >0.9999          |

**Supplementary  
Figure IX C**

**% myeloid dendritic cells spleen  
ANOVA + Tukey's**

| Tukey's multiple comparisons test | Mean Diff, | 95,00% CI of diff, | Below threshold? | Summary | Adjusted P Value |
|-----------------------------------|------------|--------------------|------------------|---------|------------------|
| WT vs. EKO                        | -2.526     | -7,055 to 2,003    | No               | ns      | 0.415926         |
| WT vs. DKO/hA-I                   | -2.028     | -6,758 to 2,702    | No               | ns      | 0.627649         |
| WT vs. DKO                        | -2.453     | -6,982 to 2,076    | No               | ns      | 0.440785         |
| EKO vs. DKO/hA-I                  | 0.4982     | -4,031 to 5,027    | No               | ns      | 0.989229         |
| EKO vs. DKO                       | 0.07315    | -4,245 to 4,391    | No               | ns      | 0.999959         |
| DKO/hA-I vs. DKO                  | -0.425     | -4,954 to 4,104    | No               | ns      | 0.993235         |

**Supplementary  
Figure IX D**

**% plasmacytoid dendritic cells spleen  
ANOVA + Tukey's**

| Tukey's multiple comparisons test | Mean Diff, | 95,00% CI of diff, | Below threshold? | Summary | Adjusted P Value |
|-----------------------------------|------------|--------------------|------------------|---------|------------------|
| WT vs. EKO                        | 13.1       | -3,422 to 29,63    | No               | ns      | 0.14993384       |
| WT vs. DKO/hA-I                   | 6.294      | -10,97 to 23,56    | No               | ns      | 0.73416205       |
| WT vs. DKO                        | 11.16      | -5,372 to 27,68    | No               | ns      | 0.25976275       |
| EKO vs. DKO/hA-I                  | -6.811     | -23,34 to 9,716    | No               | ns      | 0.65575427       |
| EKO vs. DKO                       | -1.95      | -17,71 to 13,81    | No               | ns      | 0.9848342        |
| DKO/hA-I vs. DKO                  | 4.861      | -11,67 to 21,39    | No               | ns      | 0.8389462        |

**Supplementary  
Figure IX E**

**% B1a lymphocytes lymph node  
ANOVA + Tukey's**

| Tukey's multiple comparisons test | Mean Diff, | 95,00% CI of diff, | Below threshold? | Summary | Adjusted P Value |
|-----------------------------------|------------|--------------------|------------------|---------|------------------|
| WT vs. EKO                        | -1.633     | -5,397 to 2,131    | No               | ns      | 0.62239988       |
| WT vs. DKO/hA-I                   | 4.529      | 0,5814 to 8,477    | Yes              | *       | 0.02117234       |
| WT vs. DKO                        | 3.373      | -0,3912 to 7,137   | No               | ns      | 0.08872849       |
| EKO vs. DKO/hA-I                  | 6.162      | 2,214 to 10,11     | Yes              | **      | 0.00164713       |
| EKO vs. DKO                       | 5.006      | 1,242 to 8,770     | Yes              | **      | 0.00695507       |
| DKO/hA-I vs. DKO                  | -1.156     | -5,104 to 2,792    | No               | ns      | 0.84262528       |

**Supplementary  
Figure IX F**

**% B1b lymphocytes lymph node  
ANOVA + Tukey's**

| Tukey's multiple comparisons test | Mean Diff, | 95,00% CI of diff, | Below threshold? | Summary | Adjusted P Value |
|-----------------------------------|------------|--------------------|------------------|---------|------------------|
| WT vs. EKO                        | -4.089     | -16,45 to 8,268    | No               | ns      | 0.78902293       |
| WT vs. DKO/hA-I                   | -9.85      | -22,81 to 3,110    | No               | ns      | 0.17735653       |
| WT vs. DKO                        | -4.169     | -16,53 to 8,188    | No               | ns      | 0.77936795       |
| EKO vs. DKO/hA-I                  | -5.761     | -18,72 to 7,199    | No               | ns      | 0.60423408       |
| EKO vs. DKO                       | -0.07958   | -12,44 to 12,28    | No               | ns      | 0.99999778       |
| DKO/hA-I vs. DKO                  | 5.681      | -7,279 to 18,64    | No               | ns      | 0.61464209       |

**Supplementary  
Figure IX G**

**% myeloid dendritic cells lymph node  
ANOVA + Tukey's**

| Tukey's multiple comparisons test | Mean Diff, | 95,00% CI of diff, | Below threshold? | Summary | Adjusted P Value |
|-----------------------------------|------------|--------------------|------------------|---------|------------------|
| WT vs. EKO                        | 1.055      | -1,176 to 3,286    | No               | ns      | 0.55629545       |
| WT vs. DKO/hA-I                   | 2.163      | -0,1771 to 4,503   | No               | ns      | 0.07616841       |
| WT vs. DKO                        | 1.493      | -0,7379 to 3,724   | No               | ns      | 0.26851061       |
| EKO vs. DKO/hA-I                  | 1.108      | -1,232 to 3,448    | No               | ns      | 0.55523982       |
| EKO vs. DKO                       | 0.4383     | -1,793 to 2,669    | No               | ns      | 0.94476499       |
| DKO/hA-I vs. DKO                  | -0.6697    | -3,010 to 1,670    | No               | ns      | 0.85140099       |

**Supplementary  
Figure IXH**

**Plasmacytoid dendritic cells lymph node  
Kruskal-Wallis + Dunn's**

| Dunn's multiple comparisons test | Mean rank diff, | Significant? | Summary | Adjusted P Value |
|----------------------------------|-----------------|--------------|---------|------------------|
| WT vs. EKO                       | -8.5            | No           | ns      | 0.17972126       |
| WT vs. DKO/hA-I                  | -14.13          | Yes          | **      | 0.0034728        |
| WT vs. DKO                       | -7.833          | No           | ns      | 0.27270832       |
| EKO vs. DKO/hA-I                 | -5.633          | No           | ns      | >0,99999999      |
| EKO vs. DKO                      | 0.6667          | No           | ns      | >0,99999999      |
| DKO/hA-I vs. DKO                 | 6.3             | No           | ns      | 0.750175         |

**Supplementary  
Figure IXI**

**% Ly6C low blood  
ANOVA + Tukey's**

| Tukey's multiple comparisons test | Mean Diff, | 95,00% CI of diff, | Below threshold? | Summary | Adjusted P Value |
|-----------------------------------|------------|--------------------|------------------|---------|------------------|
| WT vs. EKO                        | -0.623     | -11,63 to 10,38    | No               | ns      | 0.99868739       |
| WT vs. DKO/hA-I                   | 2.637      | -7,319 to 12,59    | No               | ns      | 0.88933359       |
| WT vs. DKO                        | 8.308      | -1,648 to 18,26    | No               | ns      | 0.12882225       |
| EKO vs. DKO/hA-I                  | 3.26       | -6,696 to 13,22    | No               | ns      | 0.81146942       |
| EKO vs. DKO                       | 8.931      | -1,025 to 18,89    | No               | ns      | 0.09148822       |
| DKO/hA-I vs. DKO                  | 5.671      | -3,109 to 14,45    | No               | ns      | 0.31563317       |

**Supplementary  
Figure IXJ**

**% Ly6C high blood  
ANOVA + Tukey's**

| Tukey's multiple comparisons test | Mean Diff, | 95,00% CI of diff, | Below threshold? | Summary | Adjusted P Value |
|-----------------------------------|------------|--------------------|------------------|---------|------------------|
| WT vs. EKO                        | 0.6076     | -12,90 to 14,11    | No               | ns      | 0.99933806       |
| WT vs. DKO/hA-I                   | -2.747     | -14,96 to 9,467    | No               | ns      | 0.92836804       |
| WT vs. DKO                        | -8.366     | -20,58 to 3,848    | No               | ns      | 0.26697312       |
| EKO vs. DKO/hA-I                  | -3.354     | -15,57 to 8,859    | No               | ns      | 0.8784717        |
| EKO vs. DKO                       | -8.974     | -21,19 to 3,240    | No               | ns      | 0.2126567        |
| DKO/hA-I vs. DKO                  | -5.619     | -16,39 to 5,152    | No               | ns      | 0.50049149       |

**Table 1**

**Eotaxin  
ANOVA + Tukey's**

| Tukey's multiple comparisons test | Mean Diff, | 95,00% CI of diff, | Below threshold? | Summary | Adjusted P Value |
|-----------------------------------|------------|--------------------|------------------|---------|------------------|
| WT vs. EKO                        | -292.8     | -894,2 to 308,6    | No               | ns      | 0.52938895       |
| WT vs. DKO/hA-I                   | -245.5     | -821,3 to 330,3    | No               | ns      | 0.63154074       |
| WT vs. DKO                        | -565       | -1141 to 10,72     | No               | ns      | 0.05548456       |
| EKO vs. DKO/hA-I                  | 47.27      | -528,5 to 623,0    | No               | ns      | 0.99543676       |
| EKO vs. DKO                       | -272.3     | -848,0 to 303,5    | No               | ns      | 0.55285708       |
| DKO/hA-I vs. DKO                  | -319.5     | -868,5 to 229,4    | No               | ns      | 0.37992357       |

**Table 1**

**G-CSF  
ANOVA + Tukey's**

| Tukey's multiple comparisons test | Mean Diff, | 95,00% CI of diff, | Below threshold? | Summary | Adjusted P Value |
|-----------------------------------|------------|--------------------|------------------|---------|------------------|
| WT vs. EKO                        | -1066      | -2759 to 626,8     | No               | ns      | 0.31458526       |
| WT vs. DKO/hA-I                   | -838.6     | -2459 to 782,2     | No               | ns      | 0.47923145       |
| WT vs. DKO                        | -73.38     | -1694 to 1547      | No               | ns      | 0.99922241       |
| EKO vs. DKO/hA-I                  | 227.4      | -1393 to 1848      | No               | ns      | 0.97821231       |
| EKO vs. DKO                       | 992.7      | -628,1 to 2613     | No               | ns      | 0.33738563       |
| DKO/hA-I vs. DKO                  | 765.2      | -780,1 to 2311     | No               | ns      | 0.51558465       |

**Table 1**

**IL-4  
ANOVA + Tukey's**

| Tukey's multiple comparisons test | Mean Diff, | 95,00% CI of diff, | Below threshold? | Summary | Adjusted P Value |
|-----------------------------------|------------|--------------------|------------------|---------|------------------|
| WT vs. EKO                        | 65.29      | -40,16 to 170,7    | No               | ns      | 0.32839115       |
| WT vs. DKO/hA-I                   | 52.69      | -48,28 to 153,7    | No               | ns      | 0.47211605       |
| WT vs. DKO                        | 76.81      | -24,15 to 177,8    | No               | ns      | 0.17530475       |
| EKO vs. DKO/hA-I                  | -12.61     | -113,6 to 88,36    | No               | ns      | 0.98442358       |
| EKO vs. DKO                       | 11.52      | -89,45 to 112,5    | No               | ns      | 0.98802662       |
| DKO/hA-I vs. DKO                  | 24.12      | -72,14 to 120,4    | No               | ns      | 0.89249852       |

**Table 1**

**IL-5  
ANOVA + Tukey's**

| Tukey's multiple comparisons test | Mean Diff, | 95,00% CI of diff, | Below threshold? | Summary | Adjusted P Value |
|-----------------------------------|------------|--------------------|------------------|---------|------------------|
| WT vs. EKO                        | -0.8927    | -81,86 to 80,07    | No               | ns      | 0.99998869       |
| WT vs. DKO/hA-I                   | 40.08      | -37,44 to 117,6    | No               | ns      | 0.47990017       |
| WT vs. DKO                        | 31.34      | -46,18 to 108,9    | No               | ns      | 0.66888057       |
| EKO vs. DKO/hA-I                  | 40.97      | -36,55 to 118,5    | No               | ns      | 0.46143393       |
| EKO vs. DKO                       | 32.23      | -45,28 to 109,7    | No               | ns      | 0.64949322       |
| DKO/hA-I vs. DKO                  | -8.736     | -82,65 to 65,17    | No               | ns      | 0.98671865       |

**Table 1**

**IL-6  
ANOVA + Tukey's**

| Tukey's multiple comparisons test | Mean Diff, | 95,00% CI of diff, | Below threshold? | Summary | Adjusted P Value |
|-----------------------------------|------------|--------------------|------------------|---------|------------------|
| WT vs. EKO                        | -11.88     | -193,4 to 169,6    | No               | ns      | 0.9976657        |
| WT vs. DKO/hA-I                   | -20.33     | -194,1 to 153,4    | No               | ns      | 0.98710939       |
| WT vs. DKO                        | -87.75     | -261,5 to 86,00    | No               | ns      | 0.49931635       |
| EKO vs. DKO/hA-I                  | -8.445     | -182,2 to 165,3    | No               | ns      | 0.99903864       |
| EKO vs. DKO                       | -75.87     | -249,6 to 97,88    | No               | ns      | 0.61413261       |
| DKO/hA-I vs. DKO                  | -67.43     | -233,1 to 98,24    | No               | ns      | 0.66431798       |

**Table 1**

**IL-10  
ANOVA + Tukey's**

| Tukey's multiple comparisons test | Mean Diff, | 95,00% CI of diff, | Below threshold? | Summary | Adjusted P Value |
|-----------------------------------|------------|--------------------|------------------|---------|------------------|
| WT vs. EKO                        | 189.9      | -59,54 to 439,4    | No               | ns      | 0.17484772       |
| WT vs. DKO/hA-I                   | 114.3      | -124,5 to 353,1    | No               | ns      | 0.54330443       |
| WT vs. DKO                        | 176.9      | -61,93 to 415,7    | No               | ns      | 0.19281211       |

|                  |        |                 |    |    |            |
|------------------|--------|-----------------|----|----|------------|
| EKO vs. DKO/hA-I | -75.62 | -314,4 to 163,2 | No | ns | 0.80757918 |
| EKO vs. DKO      | -13.01 | -251,8 to 225,8 | No | ns | 0.9986503  |
| DKO/hA-I vs. DKO | 62.61  | -165,1 to 290,3 | No | ns | 0.86377004 |

**Table 1**

| <b>IL-12 (p70)</b>                |            |                    |                  |         |                  |
|-----------------------------------|------------|--------------------|------------------|---------|------------------|
| <b>ANOVA + Tukey's</b>            |            |                    |                  |         |                  |
| Tukey's multiple comparisons test | Mean Diff, | 95,00% CI of diff, | Below threshold? | Summary | Adjusted P Value |
| WT vs. EKO                        | -225.8     | -711,2 to 259,6    | No               | ns      | 0.56580086       |
| WT vs. DKO/hA-I                   | 88.05      | -376,7 to 552,8    | No               | ns      | 0.94921884       |
| WT vs. DKO                        | 46.95      | -417,8 to 511,7    | No               | ns      | 0.99159713       |
| EKO vs. DKO/hA-I                  | 313.8      | -150,9 to 778,5    | No               | ns      | 0.25931832       |
| EKO vs. DKO                       | 272.7      | -192,0 to 737,4    | No               | ns      | 0.37293745       |
| DKO/hA-I vs. DKO                  | -41.1      | -484,2 to 402,0    | No               | ns      | 0.99346142       |

**Table 1**

| <b>IL-15</b>                      |            |                    |                  |         |                  |
|-----------------------------------|------------|--------------------|------------------|---------|------------------|
| <b>ANOVA + Tukey's</b>            |            |                    |                  |         |                  |
| Tukey's multiple comparisons test | Mean Diff. | 95,00% CI of diff. | Below threshold? | Summary | Adjusted P Value |
| WT vs. EKO                        | -5.047     | -14,04 to 3,946    | No               | ns      | 0.41388152       |
| WT vs. DKO/hA-I                   | 2.849      | -5,726 to 11,42    | No               | ns      | 0.78701435       |
| WT vs. DKO                        | -1.316     | -9,891 to 7,260    | No               | ns      | 0.97234305       |
| EKO vs. DKO/hA-I                  | 7.897      | -1,097 to 16,89    | No               | ns      | 0.09766843       |
| EKO vs. DKO                       | 3.732      | -5,262 to 12,73    | No               | ns      | 0.65420871       |
| DKO/hA-I vs. DKO                  | -4.165     | -12,74 to 4,410    | No               | ns      | 0.53477839       |

**Table 1**

| <b>IL-17</b>                     |                 |              |         |                  |  |
|----------------------------------|-----------------|--------------|---------|------------------|--|
| <b>Kruskal-Wallis + Dunn's</b>   |                 |              |         |                  |  |
| Dunn's multiple comparisons test | Mean rank diff, | Significant? | Summary | Adjusted P Value |  |
| WT vs. EKO                       | 2.3             | No           | ns      | >0,99999999      |  |
| WT vs. DKO/hA-I                  | -2.767          | No           | ns      | >0,99999999      |  |
| WT vs. DKO                       | 0.4833          | No           | ns      | >0,99999999      |  |
| EKO vs. DKO/hA-I                 | -5.067          | No           | ns      | >0,99999999      |  |
| EKO vs. DKO                      | -1.817          | No           | ns      | >0,99999999      |  |
| DKO/hA-I vs. DKO                 | 3.25            | No           | ns      | >0,99999999      |  |

**Table 1**

| <b>IP-10</b>                      |            |                    |                  |         |                  |
|-----------------------------------|------------|--------------------|------------------|---------|------------------|
| <b>ANOVA + Tukey's</b>            |            |                    |                  |         |                  |
| Tukey's multiple comparisons test | Mean Diff, | 95,00% CI of diff, | Below threshold? | Summary | Adjusted P Value |
| WT vs. EKO                        | -57.18     | -173,6 to 59,29    | No               | ns      | 0.52260039       |
| WT vs. DKO/hA-I                   | -96.1      | -207,6 to 15,40    | No               | ns      | 0.10570928       |
| WT vs. DKO                        | -50.75     | -162,3 to 60,75    | No               | ns      | 0.58272884       |
| EKO vs. DKO/hA-I                  | -38.93     | -150,4 to 72,58    | No               | ns      | 0.75874142       |
| EKO vs. DKO                       | 6.423      | -105,1 to 117,9    | No               | ns      | 0.99840502       |
| DKO/hA-I vs. DKO                  | 45.35      | -60,97 to 151,7    | No               | ns      | 0.63133468       |

**Table 1**

| <b>KC</b>                         |            |                    |                  |         |                  |
|-----------------------------------|------------|--------------------|------------------|---------|------------------|
| <b>ANOVA + Tukey's</b>            |            |                    |                  |         |                  |
| Tukey's multiple comparisons test | Mean Diff, | 95,00% CI of diff, | Below threshold? | Summary | Adjusted P Value |
| WT vs. EKO                        | -18.18     | -237,0 to 200,6    | No               | ns      | 0.99527597       |
| WT vs. DKO/hA-I                   | -33.97     | -243,5 to 175,5    | No               | ns      | 0.96713239       |
| WT vs. DKO                        | -68.59     | -278,1 to 140,9    | No               | ns      | 0.79182687       |
| EKO vs. DKO/hA-I                  | -15.79     | -225,3 to 193,7    | No               | ns      | 0.99645599       |
| EKO vs. DKO                       | -50.41     | -259,9 to 159,1    | No               | ns      | 0.90331531       |
| DKO/hA-I vs. DKO                  | -34.62     | -234,4 to 165,1    | No               | ns      | 0.96036873       |

**Table 1**

| <b>LIX</b>                        |            |                    |                  |         |                  |
|-----------------------------------|------------|--------------------|------------------|---------|------------------|
| <b>ANOVA + Tukey's</b>            |            |                    |                  |         |                  |
| Tukey's multiple comparisons test | Mean Diff, | 95,00% CI of diff, | Below threshold? | Summary | Adjusted P Value |
| WT vs. EKO                        | 960.8      | -7841 to 9762      | No               | ns      | 0.98946439       |
| WT vs. DKO/hA-I                   | -2800      | -11227 to 5626     | No               | ns      | 0.78442792       |
| WT vs. DKO                        | -3035      | -11462 to 5392     | No               | ns      | 0.74128912       |
| EKO vs. DKO/hA-I                  | -3761      | -12188 to 4665     | No               | ns      | 0.59771516       |
| EKO vs. DKO                       | -3996      | -12422 to 4431     | No               | ns      | 0.55065009       |
| DKO/hA-I vs. DKO                  | -234.5     | -8269 to 7800      | No               | ns      | 0.99979077       |

**Table 1**

| <b>MIG</b>                        |            |                    |                  |         |                  |
|-----------------------------------|------------|--------------------|------------------|---------|------------------|
| <b>ANOVA + Tukey's</b>            |            |                    |                  |         |                  |
| Tukey's multiple comparisons test | Mean Diff, | 95,00% CI of diff, | Below threshold? | Summary | Adjusted P Value |
| WT vs. EKO                        | 18.63      | -51,70 to 88,96    | No               | ns      | 0.87606188       |
| WT vs. DKO/hA-I                   | -1.657     | -69,00 to 65,68    | No               | ns      | 0.99987444       |
| WT vs. DKO                        | -15.47     | -82,81 to 51,87    | No               | ns      | 0.91439098       |
| EKO vs. DKO/hA-I                  | -20.29     | -87,63 to 47,05    | No               | ns      | 0.82924088       |
| EKO vs. DKO                       | -34.1      | -101,4 to 33,24    | No               | ns      | 0.49709968       |
| DKO/hA-I vs. DKO                  | -13.82     | -78,02 to 50,39    | No               | ns      | 0.92816812       |

**Supplementary  
Figure XIII A**

| <b>CD4/prolif</b>                    |            |                    |                  |         |                  |
|--------------------------------------|------------|--------------------|------------------|---------|------------------|
| <b>ANOVA + Tukey's</b>               |            |                    |                  |         |                  |
| Tukey's multiple comparisons test    | Mean Diff. | 95,00% CI of diff. | Below threshold? | Summary | Adjusted P Value |
| Control vs. ApoA-I 10 µg/ml          | 17.46      | 4,976 to 29,93     | Yes              | **      | 0.00359481       |
| Control vs. ApoA-I 25 µg/ml          | 24.03      | 11,55 to 36,51     | Yes              | ***     | 0.00011127       |
| Control vs. ApoA-I 50 µg/ml          | 25.56      | 13,08 to 38,04     | Yes              | ****    | 0.00005165       |
| Control vs. ApoA-I 100 µg/ml         | 33.99      | 21,51 to 46,46     | Yes              | ****    | 0.00000104       |
| Control vs. Resting                  | 43.4       | 30,92 to 55,87     | Yes              | ****    | 0.00000003       |
| ApoA-I 10 µg/ml vs. ApoA-I 25 µg/ml  | 6.578      | -5,901 to 19,06    | No               | ns      | 0.56363273       |
| ApoA-I 10 µg/ml vs. ApoA-I 50 µg/ml  | 8.103      | -4,376 to 20,58    | No               | ns      | 0.34785893       |
| ApoA-I 10 µg/ml vs. ApoA-I 100 µg/ml | 16.53      | 4,051 to 29,01     | Yes              | **      | 0.00592282       |
| ApoA-I 10 µg/ml vs. Resting          | 25.94      | 13,46 to 38,42     | Yes              | ****    | 0.00004273       |
| ApoA-I 25 µg/ml vs. ApoA-I 50 µg/ml  | 1.525      | -10,95 to 14,00    | No               | ns      | 0.99864816       |



|                                      |       |                 |     |    |            |
|--------------------------------------|-------|-----------------|-----|----|------------|
| ApoA-I 25 µg/ml vs. ApoA-I 100 µg/ml | 9.953 | -2.526 to 22.43 | No  | ns | 0.16568977 |
| ApoA-I 25 µg/ml vs. Resting          | 19.36 | 6.884 to 31.84  | Yes | ** | 0.00128655 |
| ApoA-I 50 µg/ml vs. ApoA-I 100 µg/ml | 8.428 | -4.051 to 20.91 | No  | ns | 0.30875223 |
| ApoA-I 50 µg/ml vs. Resting          | 17.84 | 5.359 to 30.32  | Yes | ** | 0.00292403 |
| ApoA-I 100 µg/ml vs. Resting         | 9.41  | -3.069 to 21.89 | No  | ns | 0.20901075 |

Supplementary  
Figure XIII B

| CD8/prolif                           |            |                    |                  |         |                  |  |
|--------------------------------------|------------|--------------------|------------------|---------|------------------|--|
| ANOVA + Tukey's                      |            |                    |                  |         |                  |  |
| Tukey's multiple comparisons test    | Mean Diff. | 95.00% CI of diff. | Below threshold? | Summary | Adjusted P Value |  |
| Control vs. ApoA-I 10 µg/ml          | 11.07      | -8.559 to 30.69    | No               | ns      | 0.48891273       |  |
| Control vs. ApoA-I 25 µg/ml          | 23.63      | 4.004 to 43.26     | Yes              | *       | 0.01358581       |  |
| Control vs. ApoA-I 50 µg/ml          | 33.47      | 13.85 to 53.10     | Yes              | ***     | 0.00051712       |  |
| Control vs. ApoA-I 100 µg/ml         | 34.68      | 15.05 to 54.30     | Yes              | ***     | 0.00035036       |  |
| Control vs. Resting                  | 72.92      | 51.72 to 94.12     | Yes              | ****    | 0.00000005       |  |
| ApoA-I 10 µg/ml vs. ApoA-I 25 µg/ml  | 12.56      | -7.064 to 32.19    | No               | ns      | 0.35785153       |  |
| ApoA-I 10 µg/ml vs. ApoA-I 50 µg/ml  | 22.41      | 2.779 to 42.03     | Yes              | *       | 0.0203711        |  |
| ApoA-I 10 µg/ml vs. ApoA-I 100 µg/ml | 23.61      | 3.984 to 43.24     | Yes              | *       | 0.01367636       |  |
| ApoA-I 10 µg/ml vs. Resting          | 61.86      | 40.66 to 83.05     | Yes              | ****    | 0.00000055       |  |
| ApoA-I 25 µg/ml vs. ApoA-I 50 µg/ml  | 9.843      | -9.784 to 29.47    | No               | ns      | 0.60687097       |  |
| ApoA-I 25 µg/ml vs. ApoA-I 100 µg/ml | 11.05      | -8.579 to 30.67    | No               | ns      | 0.49078807       |  |
| ApoA-I 25 µg/ml vs. Resting          | 49.29      | 28.09 to 70.49     | Yes              | ****    | 0.00001246       |  |
| ApoA-I 50 µg/ml vs. ApoA-I 100 µg/ml | 1.205      | -18.42 to 20.83    | No               | ns      | 0.99995115       |  |
| ApoA-I 50 µg/ml vs. Resting          | 39.45      | 18.25 to 60.65     | Yes              | ***     | 0.00019448       |  |
| ApoA-I 100 µg/ml vs. Resting         | 38.25      | 17.05 to 59.44     | Yes              | ***     | 0.00027723       |  |

Supplementary  
Figure XIII C

| % INFγ/CD4                           |            |                    |                  |         |                  |  |
|--------------------------------------|------------|--------------------|------------------|---------|------------------|--|
| ANOVA + Tukey's                      |            |                    |                  |         |                  |  |
| Tukey's multiple comparisons test    | Mean Diff. | 95.00% CI of diff. | Below threshold? | Summary | Adjusted P Value |  |
| Control vs. ApoA-I 10 µg/ml          | 0.2025     | -0.8327 to 1.238   | No               | ns      | 0.98790112       |  |
| Control vs. ApoA-I 25 µg/ml          | 1.858      | 0.8223 to 2.893    | Yes              | ***     | 0.0002591        |  |
| Control vs. ApoA-I 50 µg/ml          | 3.285      | 2.250 to 4.320     | Yes              | ****    | 0.00000011       |  |
| Control vs. ApoA-I 100 µg/ml         | 5.043      | 4.007 to 6.078     | Yes              | ****    | <0.00000001      |  |
| Control vs. Resting                  | 6.53       | 5.495 to 7.565     | Yes              | ****    | <0.00000001      |  |
| ApoA-I 10 µg/ml vs. ApoA-I 25 µg/ml  | 1.655      | 0.6198 to 2.690    | Yes              | ***     | 0.0009395        |  |
| ApoA-I 10 µg/ml vs. ApoA-I 50 µg/ml  | 3.083      | 2.047 to 4.118     | Yes              | ****    | 0.00000028       |  |
| ApoA-I 10 µg/ml vs. ApoA-I 100 µg/ml | 4.84       | 3.805 to 5.875     | Yes              | ****    | <0.00000001      |  |
| ApoA-I 10 µg/ml vs. Resting          | 6.328      | 5.292 to 7.363     | Yes              | ****    | <0.00000001      |  |
| ApoA-I 25 µg/ml vs. ApoA-I 50 µg/ml  | 1.428      | 0.3923 to 2.463    | Yes              | **      | 0.00410872       |  |
| ApoA-I 25 µg/ml vs. ApoA-I 100 µg/ml | 3.185      | 2.150 to 4.220     | Yes              | ****    | 0.00000017       |  |
| ApoA-I 25 µg/ml vs. Resting          | 4.673      | 3.637 to 5.708     | Yes              | ****    | <0.00000001      |  |
| ApoA-I 50 µg/ml vs. ApoA-I 100 µg/ml | 1.758      | 0.7223 to 2.793    | Yes              | ***     | 0.00048746       |  |
| ApoA-I 50 µg/ml vs. Resting          | 3.245      | 2.210 to 4.280     | Yes              | ****    | 0.00000013       |  |
| ApoA-I 100 µg/ml vs. Resting         | 1.488      | 0.4523 to 2.523    | Yes              | **      | 0.00278037       |  |

Supplementary  
Figure XIII D

| % IL17/CD4                             |            |                    |                  |         |                  |  |
|----------------------------------------|------------|--------------------|------------------|---------|------------------|--|
| Welch's ANOVA +Dunnett's               |            |                    |                  |         |                  |  |
| Dunnett's T3 multiple comparisons test | Mean Diff. | 95.00% CI of diff. | Below threshold? | Summary | Adjusted P Value |  |
| ApoA-I 10 µg/ml vs. ApoA-I 25 µg/ml    | 1.743      | -4.305 to 7.790    | No               | ns      | 0.48889158       |  |
| ApoA-I 10 µg/ml vs. ApoA-I 50 µg/ml    | 3.83       | -2.282 to 9.942    | No               | ns      | 0.08978227       |  |
| Control vs. ApoA-I 10 µg/ml            | 3.46       | -1.639 to 8.559    | No               | ns      | 0.0931755        |  |
| ApoA-I 10 µg/ml vs. ApoA-I 100 µg/ml   | 10.28      | 4.144 to 16.41     | Yes              | **      | 0.00560205       |  |
| ApoA-I 10 µg/ml vs. Resting            | 14.95      | 9.017 to 20.87     | Yes              | **      | 0.00167402       |  |
| ApoA-I 100 µg/ml vs. Resting           | 4.67       | 2.974 to 6.366     | Yes              | **      | 0.00128639       |  |
| ApoA-I 25 µg/ml vs. ApoA-I 100 µg/ml   | 8.533      | 7.246 to 9.819     | Yes              | ****    | 0.00000057       |  |
| ApoA-I 25 µg/ml vs. ApoA-I 50 µg/ml    | 2.088      | 0.8360 to 3.339    | Yes              | **      | 0.00176556       |  |
| ApoA-I 25 µg/ml vs. Resting            | 13.2       | 12.13 to 14.28     | Yes              | ****    | 0.00000136       |  |
| ApoA-I 50 µg/ml vs. ApoA-I 100 µg/ml   | 6.445      | 5.048 to 7.842     | Yes              | ****    | 0.00000493       |  |
| ApoA-I 50 µg/ml vs. Resting            | 11.12      | 9.838 to 12.39     | Yes              | ****    | 0.00000054       |  |
| Control vs. ApoA-I 100 µg/ml           | 13.74      | 11.59 to 15.88     | Yes              | ****    | 0.00000347       |  |
| Control vs. ApoA-I 25 µg/ml            | 5.203      | 2.860 to 7.545     | Yes              | **      | 0.00122097       |  |
| Control vs. ApoA-I 50 µg/ml            | 7.29       | 5.172 to 9.408     | Yes              | ****    | 0.00007563       |  |
| Control vs. Resting                    | 18.41      | 15.67 to 21.14     | Yes              | ****    | 0.00008883       |  |

Supplementary  
Figure XIII E

| % INFγ/CD8                           |            |                    |                  |         |                  |  |
|--------------------------------------|------------|--------------------|------------------|---------|------------------|--|
| ANOVA + Tukey's                      |            |                    |                  |         |                  |  |
| Tukey's multiple comparisons test    | Mean Diff. | 95.00% CI of diff. | Below threshold? | Summary | Adjusted P Value |  |
| Control vs. ApoA-I 10 µg/ml          | 9.233      | 6.330 to 12.13     | Yes              | ****    | 0.00000001       |  |
| Control vs. ApoA-I 25 µg/ml          | 13.6       | 10.70 to 16.50     | Yes              | ****    | <0.00000001      |  |
| Control vs. ApoA-I 50 µg/ml          | 25.53      | 22.63 to 28.43     | Yes              | ****    | <0.00000001      |  |
| Control vs. ApoA-I 100 µg/ml         | 37.64      | 34.74 to 40.54     | Yes              | ****    | <0.00000001      |  |
| Control vs. Resting                  | 41.24      | 38.34 to 44.14     | Yes              | ****    | <0.00000001      |  |
| ApoA-I 10 µg/ml vs. ApoA-I 25 µg/ml  | 4.368      | 1.465 to 7.270     | Yes              | **      | 0.00175952       |  |
| ApoA-I 10 µg/ml vs. ApoA-I 50 µg/ml  | 16.3       | 13.40 to 19.20     | Yes              | ****    | <0.00000001      |  |
| ApoA-I 10 µg/ml vs. ApoA-I 100 µg/ml | 28.41      | 25.51 to 31.31     | Yes              | ****    | <0.00000001      |  |
| ApoA-I 10 µg/ml vs. Resting          | 32.01      | 29.11 to 34.91     | Yes              | ****    | <0.00000001      |  |
| ApoA-I 25 µg/ml vs. ApoA-I 50 µg/ml  | 11.93      | 9.030 to 14.83     | Yes              | ****    | <0.00000001      |  |
| ApoA-I 25 µg/ml vs. ApoA-I 100 µg/ml | 24.04      | 21.14 to 26.94     | Yes              | ****    | <0.00000001      |  |
| ApoA-I 25 µg/ml vs. Resting          | 27.64      | 24.74 to 30.54     | Yes              | ****    | <0.00000001      |  |
| ApoA-I 50 µg/ml vs. ApoA-I 100 µg/ml | 12.11      | 9.208 to 15.01     | Yes              | ****    | <0.00000001      |  |
| ApoA-I 50 µg/ml vs. Resting          | 15.71      | 12.81 to 18.61     | Yes              | ****    | <0.00000001      |  |
| ApoA-I 100 µg/ml vs. Resting         | 3.6        | 0.6979 to 6.502    | Yes              | *       | 0.01041919       |  |

Supplementary  
Figure XIII F

| % IL17/CD8      |  |  |
|-----------------|--|--|
| ANOVA + Tukey's |  |  |

| Tukey's multiple comparisons test    | Mean Diff. | 95.00% CI of diff. | Below threshold? | Summary | Adjusted P Value |
|--------------------------------------|------------|--------------------|------------------|---------|------------------|
| Control vs. ApoA-I 10 µg/ml          | 6.938      | 4.567 to 9.308     | Yes              | ****    | 0.00000036       |
| Control vs. ApoA-I 25 µg/ml          | 11.91      | 9.534 to 14.28     | Yes              | ****    | <0.00000001      |
| Control vs. ApoA-I 50 µg/ml          | 20.31      | 17.94 to 22.68     | Yes              | ****    | <0.00000001      |
| Control vs. ApoA-I 100 µg/ml         | 30.09      | 27.72 to 32.46     | Yes              | ****    | <0.00000001      |
| Control vs. Resting                  | 35.34      | 32.96 to 37.71     | Yes              | ****    | <0.00000001      |
| ApoA-I 10 µg/ml vs. ApoA-I 25 µg/ml  | 4.968      | 2.597 to 7.338     | Yes              | ****    | 0.0000386        |
| ApoA-I 10 µg/ml vs. ApoA-I 50 µg/ml  | 13.37      | 11.00 to 15.74     | Yes              | ****    | <0.00000001      |
| ApoA-I 10 µg/ml vs. ApoA-I 100 µg/ml | 23.16      | 20.78 to 25.53     | Yes              | ****    | <0.00000001      |
| ApoA-I 10 µg/ml vs. Resting          | 28.4       | 26.03 to 30.77     | Yes              | ****    | <0.00000001      |
| ApoA-I 25 µg/ml vs. ApoA-I 50 µg/ml  | 8.403      | 6.032 to 10.77     | Yes              | ****    | 0.00000002       |
| ApoA-I 25 µg/ml vs. ApoA-I 100 µg/ml | 18.19      | 15.82 to 20.56     | Yes              | ****    | <0.00000001      |
| ApoA-I 25 µg/ml vs. Resting          | 23.43      | 21.06 to 25.80     | Yes              | ****    | <0.00000001      |
| ApoA-I 50 µg/ml vs. ApoA-I 100 µg/ml | 9.785      | 7.414 to 12.16     | Yes              | ****    | <0.00000001      |
| ApoA-I 50 µg/ml vs. Resting          | 15.03      | 12.66 to 17.40     | Yes              | ****    | <0.00000001      |
| ApoA-I 100 µg/ml vs. Resting         | 5.243      | 2.872 to 7.613     | Yes              | ****    | 0.00001908       |

**Supplementary  
Figure XIVA**

| % IL15/CD4                           |                 |              |         |                  |  |
|--------------------------------------|-----------------|--------------|---------|------------------|--|
| Kruskal-Wallis + Dunn's              |                 |              |         |                  |  |
| Dunn's multiple comparisons test     | Mean rank diff. | Significant? | Summary | Adjusted P Value |  |
| Control vs. ApoA-I 10 µg/ml          | 7.75            | No           | ns      | >0.99999999      |  |
| Control vs. ApoA-I 25 µg/ml          | 5.25            | No           | ns      | >0.99999999      |  |
| Control vs. ApoA-I 50 µg/ml          | 11              | No           | ns      | 0.41710343       |  |
| Control vs. ApoA-I 100 µg/ml         | 16              | Yes          | *       | 0.02061414       |  |
| Control vs. Resting                  | 20              | Yes          | ***     | 0.00095014       |  |
| ApoA-I 10 µg/ml vs. ApoA-I 25 µg/ml  | -2.5            | No           | ns      | >0.99999999      |  |
| ApoA-I 10 µg/ml vs. ApoA-I 50 µg/ml  | 3.25            | No           | ns      | >0.99999999      |  |
| ApoA-I 10 µg/ml vs. ApoA-I 100 µg/ml | 8.25            | No           | ns      | >0.99999999      |  |
| ApoA-I 10 µg/ml vs. Resting          | 12.25           | No           | ns      | 0.21428432       |  |
| ApoA-I 25 µg/ml vs. ApoA-I 50 µg/ml  | 5.75            | No           | ns      | >0.99999999      |  |
| ApoA-I 25 µg/ml vs. ApoA-I 100 µg/ml | 10.75           | No           | ns      | 0.47332822       |  |
| ApoA-I 25 µg/ml vs. Resting          | 14.75           | Yes          | *       | 0.04766609       |  |
| ApoA-I 50 µg/ml vs. ApoA-I 100 µg/ml | 5               | No           | ns      | >0.99999999      |  |
| ApoA-I 50 µg/ml vs. Resting          | 9               | No           | ns      | >0.99999999      |  |
| ApoA-I 100 µg/ml vs. Resting         | 4               | No           | ns      | >0.99999999      |  |

**Supplementary  
Figure XIVB**

| % IL15/CD8                           |            |                    |                  |         |                  |
|--------------------------------------|------------|--------------------|------------------|---------|------------------|
| ANOVA + Tukey's                      |            |                    |                  |         |                  |
| Tukey's multiple comparisons test    | Mean Diff. | 95.00% CI of diff. | Below threshold? | Summary | Adjusted P Value |
| Control vs. ApoA-I 10 µg/ml          | 3.345      | 0.2830 to 6.407    | Yes              | *       | 0.02769205       |
| Control vs. ApoA-I 25 µg/ml          | 10.11      | 7.043 to 13.17     | Yes              | ****    | 0.00000006       |
| Control vs. ApoA-I 50 µg/ml          | 23.71      | 20.65 to 26.77     | Yes              | ****    | <0.00000001      |
| Control vs. ApoA-I 100 µg/ml         | 34.78      | 31.71 to 37.84     | Yes              | ****    | <0.00000001      |
| Control vs. Resting                  | 41.64      | 38.58 to 44.70     | Yes              | ****    | <0.00000001      |
| ApoA-I 10 µg/ml vs. ApoA-I 25 µg/ml  | 6.76       | 3.698 to 9.822     | Yes              | ****    | 0.00001948       |
| ApoA-I 10 µg/ml vs. ApoA-I 50 µg/ml  | 20.37      | 17.31 to 23.43     | Yes              | ****    | <0.00000001      |
| ApoA-I 10 µg/ml vs. ApoA-I 100 µg/ml | 31.43      | 28.37 to 34.49     | Yes              | ****    | <0.00000001      |
| ApoA-I 10 µg/ml vs. Resting          | 38.3       | 35.23 to 41.36     | Yes              | ****    | <0.00000001      |
| ApoA-I 25 µg/ml vs. ApoA-I 50 µg/ml  | 13.61      | 10.55 to 16.67     | Yes              | ****    | <0.00000001      |
| ApoA-I 25 µg/ml vs. ApoA-I 100 µg/ml | 24.67      | 21.61 to 27.73     | Yes              | ****    | <0.00000001      |
| ApoA-I 25 µg/ml vs. Resting          | 31.54      | 28.47 to 34.60     | Yes              | ****    | <0.00000001      |
| ApoA-I 50 µg/ml vs. ApoA-I 100 µg/ml | 11.06      | 8.000 to 14.12     | Yes              | ****    | 0.00000001       |
| ApoA-I 50 µg/ml vs. Resting          | 17.93      | 14.87 to 20.99     | Yes              | ****    | <0.00000001      |
| ApoA-I 100 µg/ml vs. Resting         | 6.865      | 3.803 to 9.927     | Yes              | ****    | 0.00001587       |

**Supplementary  
Figure XIVC**

| % IL4/CD4                            |            |                    |                  |         |                  |
|--------------------------------------|------------|--------------------|------------------|---------|------------------|
| ANOVA + Tukey's                      |            |                    |                  |         |                  |
| Tukey's multiple comparisons test    | Mean Diff. | 95.00% CI of diff. | Below threshold? | Summary | Adjusted P Value |
| Control vs. ApoA-I 10 µg/ml          | 7.043      | 3.953 to 10.13     | Yes              | ****    | 0.00001269       |
| Control vs. ApoA-I 25 µg/ml          | -3.208     | -6.297 to -0.1183  | Yes              | *       | 0.03923849       |
| Control vs. ApoA-I 50 µg/ml          | -2.423     | -5.512 to 0.6667   | No               | ns      | 0.17817092       |
| Control vs. ApoA-I 100 µg/ml         | 20.85      | 17.76 to 23.94     | Yes              | ****    | <0.00000001      |
| Control vs. Resting                  | 53.78      | 50.69 to 56.86     | Yes              | ****    | <0.00000001      |
| ApoA-I 10 µg/ml vs. ApoA-I 25 µg/ml  | -10.25     | -13.34 to -7.161   | Yes              | ****    | 0.00000005       |
| ApoA-I 10 µg/ml vs. ApoA-I 50 µg/ml  | -9.465     | -12.55 to -6.376   | Yes              | ****    | 0.00000018       |
| ApoA-I 10 µg/ml vs. ApoA-I 100 µg/ml | 13.81      | 10.72 to 16.90     | Yes              | ****    | <0.00000001      |
| ApoA-I 10 µg/ml vs. Resting          | 46.73      | 43.64 to 49.82     | Yes              | ****    | <0.00000001      |
| ApoA-I 25 µg/ml vs. ApoA-I 50 µg/ml  | 0.785      | -2.304 to 3.874    | No               | ns      | 0.96239711       |
| ApoA-I 25 µg/ml vs. ApoA-I 100 µg/ml | 24.06      | 20.97 to 27.15     | Yes              | ****    | <0.00000001      |
| ApoA-I 25 µg/ml vs. Resting          | 56.98      | 53.89 to 60.07     | Yes              | ****    | <0.00000001      |
| ApoA-I 50 µg/ml vs. ApoA-I 100 µg/ml | 23.28      | 20.19 to 26.36     | Yes              | ****    | <0.00000001      |
| ApoA-I 50 µg/ml vs. Resting          | 56.2       | 53.11 to 59.29     | Yes              | ****    | <0.00000001      |
| ApoA-I 100 µg/ml vs. Resting         | 32.92      | 29.83 to 36.01     | Yes              | ****    | <0.00000001      |

**Supplementary  
Figure XIVD**

| % IL4/CD8                            |            |                    |                  |         |                  |
|--------------------------------------|------------|--------------------|------------------|---------|------------------|
| ANOVA + Tukey's                      |            |                    |                  |         |                  |
| Tukey's multiple comparisons test    | Mean Diff. | 95.00% CI of diff. | Below threshold? | Summary | Adjusted P Value |
| Control vs. ApoA-I 10 µg/ml          | 5.865      | 2.600 to 9.130     | Yes              | ***     | 0.00025576       |
| Control vs. ApoA-I 25 µg/ml          | -2.673     | -5.938 to 0.5925   | No               | ns      | 0.1475696        |
| Control vs. ApoA-I 50 µg/ml          | 6.45       | 3.185 to 9.715     | Yes              | ****    | 0.0000813        |
| Control vs. ApoA-I 100 µg/ml         | 25.51      | 22.24 to 28.77     | Yes              | ****    | <0.00000001      |
| Control vs. Resting                  | 66.97      | 63.71 to 70.24     | Yes              | ****    | <0.00000001      |
| ApoA-I 10 µg/ml vs. ApoA-I 25 µg/ml  | -8.538     | -11.80 to -5.272   | Yes              | ****    | 0.00000188       |
| ApoA-I 10 µg/ml vs. ApoA-I 50 µg/ml  | 0.585      | -2.680 to 3.850    | No               | ns      | 0.99186646       |
| ApoA-I 10 µg/ml vs. ApoA-I 100 µg/ml | 19.64      | 16.38 to 22.91     | Yes              | ****    | <0.00000001      |
| ApoA-I 10 µg/ml vs. Resting          | 61.11      | 57.84 to 64.37     | Yes              | ****    | <0.00000001      |

|                                      |       |                |     |      |             |
|--------------------------------------|-------|----------------|-----|------|-------------|
| ApoA-I 25 µg/ml vs. ApoA-I 50 µg/ml  | 9.123 | 5.857 to 12.39 | Yes | **** | 0.00000072  |
| ApoA-I 25 µg/ml vs. ApoA-I 100 µg/ml | 28.18 | 24.91 to 31.45 | Yes | **** | <0.00000001 |
| ApoA-I 25 µg/ml vs. Resting          | 69.65 | 66.38 to 72.91 | Yes | **** | <0.00000001 |
| ApoA-I 50 µg/ml vs. ApoA-I 100 µg/ml | 19.06 | 15.79 to 22.32 | Yes | **** | <0.00000001 |
| ApoA-I 50 µg/ml vs. Resting          | 60.52 | 57.26 to 63.79 | Yes | **** | <0.00000001 |
| ApoA-I 100 µg/ml vs. Resting         | 41.47 | 38.20 to 44.73 | Yes | **** | <0.00000001 |

**Supplementary  
Figure XVA**

| <b>CTXb CD4</b>                      |            |                    |                  |         |                  |  |
|--------------------------------------|------------|--------------------|------------------|---------|------------------|--|
| <b>ANOVA + Tukey's</b>               |            |                    |                  |         |                  |  |
| Tukey's multiple comparisons test    | Mean Diff. | 95.00% CI of diff. | Below threshold? | Summary | Adjusted P Value |  |
| Control vs. ApoA-I 10 µg/ml          | 636.7      | -2071 to 3344      | No               | ns      | 0.96403246       |  |
| Control vs. ApoA-I 25 µg/ml          | 1633       | -1074 to 4340      | No               | ns      | 0.38282828       |  |
| Control vs. ApoA-I 50 µg/ml          | 7846       | 5138 to 10553      | Yes              | ****    | 0.00000562       |  |
| Control vs. ApoA-I 100 µg/ml         | 21229      | 18522 to 23936     | Yes              | ****    | <0.00000001      |  |
| Control vs. Resting                  | 29153      | 26446 to 31860     | Yes              | ****    | <0.00000001      |  |
| ApoA-I 10 µg/ml vs. ApoA-I 25 µg/ml  | 996.3      | -1711 to 3704      | No               | ns      | 0.81173799       |  |
| ApoA-I 10 µg/ml vs. ApoA-I 50 µg/ml  | 7209       | 4502 to 9916       | Yes              | ****    | 0.00001373       |  |
| ApoA-I 10 µg/ml vs. ApoA-I 100 µg/ml | 20592      | 17885 to 23300     | Yes              | ****    | <0.00000001      |  |
| ApoA-I 10 µg/ml vs. Resting          | 28516      | 25809 to 31224     | Yes              | ****    | <0.00000001      |  |
| ApoA-I 25 µg/ml vs. ApoA-I 50 µg/ml  | 6213       | 3505 to 8920       | Yes              | ****    | 0.00006284       |  |
| ApoA-I 25 µg/ml vs. ApoA-I 100 µg/ml | 19596      | 16889 to 22303     | Yes              | ****    | <0.00000001      |  |
| ApoA-I 25 µg/ml vs. Resting          | 27520      | 24813 to 30227     | Yes              | ****    | <0.00000001      |  |
| ApoA-I 50 µg/ml vs. ApoA-I 100 µg/ml | 13383      | 10676 to 16091     | Yes              | ****    | 0.00000001       |  |
| ApoA-I 50 µg/ml vs. Resting          | 21307      | 18600 to 24015     | Yes              | ****    | <0.00000001      |  |
| ApoA-I 100 µg/ml vs. Resting         | 7924       | 5217 to 10631      | Yes              | ****    | 0.00000506       |  |

**Supplementary  
Figure XVB**

| <b>CTXb CD8</b>                      |            |                    |                  |         |                  |  |
|--------------------------------------|------------|--------------------|------------------|---------|------------------|--|
| <b>ANOVA + Tukey's</b>               |            |                    |                  |         |                  |  |
| Tukey's multiple comparisons test    | Mean Diff. | 95.00% CI of diff. | Below threshold? | Summary | Adjusted P Value |  |
| Control vs. ApoA-I 10 µg/ml          | 350        | -3175 to 3875      | No               | ns      | 0.99929752       |  |
| Control vs. ApoA-I 25 µg/ml          | 8660       | 5134 to 12185      | Yes              | ****    | 0.00003158       |  |
| Control vs. ApoA-I 50 µg/ml          | 23448      | 19922 to 26973     | Yes              | ****    | <0.00000001      |  |
| Control vs. ApoA-I 100 µg/ml         | 31436      | 27911 to 34961     | Yes              | ****    | <0.00000001      |  |
| Control vs. Resting                  | 50577      | 47051 to 54102     | Yes              | ****    | <0.00000001      |  |
| ApoA-I 10 µg/ml vs. ApoA-I 25 µg/ml  | 8310       | 4784 to 11835      | Yes              | ****    | 0.000048         |  |
| ApoA-I 10 µg/ml vs. ApoA-I 50 µg/ml  | 23098      | 19572 to 26623     | Yes              | ****    | <0.00000001      |  |
| ApoA-I 10 µg/ml vs. ApoA-I 100 µg/ml | 31086      | 27561 to 34611     | Yes              | ****    | <0.00000001      |  |
| ApoA-I 10 µg/ml vs. Resting          | 50227      | 46701 to 53752     | Yes              | ****    | <0.00000001      |  |
| ApoA-I 25 µg/ml vs. ApoA-I 50 µg/ml  | 14788      | 11263 to 18313     | Yes              | ****    | 0.00000009       |  |
| ApoA-I 25 µg/ml vs. ApoA-I 100 µg/ml | 22776      | 19251 to 26302     | Yes              | ****    | <0.00000001      |  |
| ApoA-I 25 µg/ml vs. Resting          | 41917      | 38392 to 45442     | Yes              | ****    | <0.00000001      |  |
| ApoA-I 50 µg/ml vs. ApoA-I 100 µg/ml | 7988       | 4463 to 11514      | Yes              | ****    | 0.00007125       |  |
| ApoA-I 50 µg/ml vs. Resting          | 27129      | 23604 to 30654     | Yes              | ****    | <0.00000001      |  |
| ApoA-I 100 µg/ml vs. Resting         | 19141      | 15615 to 22666     | Yes              | ****    | <0.00000001      |  |

**Supplementary  
Figure XVC**

| <b>Filipin CD4</b>                   |            |                    |                  |         |                  |  |
|--------------------------------------|------------|--------------------|------------------|---------|------------------|--|
| <b>ANOVA + Tukey's</b>               |            |                    |                  |         |                  |  |
| Tukey's multiple comparisons test    | Mean Diff. | 95.00% CI of diff. | Below threshold? | Summary | Adjusted P Value |  |
| Control vs. ApoA-I 10 µg/ml          | 19         | 11.22 to 26.78     | Yes              | ****    | 0.0000337        |  |
| Control vs. ApoA-I 25 µg/ml          | 6          | -1.784 to 13.78    | No               | ns      | 0.17349341       |  |
| Control vs. ApoA-I 50 µg/ml          | 43.67      | 35.88 to 51.45     | Yes              | ****    | <0.00000001      |  |
| Control vs. ApoA-I 100 µg/ml         | 61         | 53.22 to 68.78     | Yes              | ****    | <0.00000001      |  |
| Control vs. Resting                  | 55         | 47.22 to 62.78     | Yes              | ****    | <0.00000001      |  |
| ApoA-I 10 µg/ml vs. ApoA-I 25 µg/ml  | -13        | -20.78 to -5.216   | Yes              | **      | 0.00123439       |  |
| ApoA-I 10 µg/ml vs. ApoA-I 50 µg/ml  | 24.67      | 16.88 to 32.45     | Yes              | ****    | 0.00000215       |  |
| ApoA-I 10 µg/ml vs. ApoA-I 100 µg/ml | 42         | 34.22 to 49.78     | Yes              | ****    | <0.00000001      |  |
| ApoA-I 10 µg/ml vs. Resting          | 36         | 28.22 to 43.78     | Yes              | ****    | 0.00000003       |  |
| ApoA-I 25 µg/ml vs. ApoA-I 50 µg/ml  | 37.67      | 29.88 to 45.45     | Yes              | ****    | 0.00000002       |  |
| ApoA-I 25 µg/ml vs. ApoA-I 100 µg/ml | 55         | 47.22 to 62.78     | Yes              | ****    | <0.00000001      |  |
| ApoA-I 25 µg/ml vs. Resting          | 49         | 41.22 to 56.78     | Yes              | ****    | <0.00000001      |  |
| ApoA-I 50 µg/ml vs. ApoA-I 100 µg/ml | 17.33      | 9.549 to 25.12     | Yes              | ****    | 0.00008473       |  |
| ApoA-I 50 µg/ml vs. Resting          | 11.33      | 3.549 to 19.12     | Yes              | **      | 0.00386256       |  |
| ApoA-I 100 µg/ml vs. Resting         | -6         | -13.78 to 1.784    | No               | ns      | 0.17349341       |  |

**Supplementary  
Figure XVD**

| <b>Filipin CD8</b>                   |            |                    |                  |         |                  |  |
|--------------------------------------|------------|--------------------|------------------|---------|------------------|--|
| <b>ANOVA + Tukey's</b>               |            |                    |                  |         |                  |  |
| Tukey's multiple comparisons test    | Mean Diff. | 95.00% CI of diff. | Below threshold? | Summary | Adjusted P Value |  |
| Control vs. ApoA-I 10 µg/ml          | 15.67      | 8.382 to 22.95     | Yes              | ***     | 0.00011929       |  |
| Control vs. ApoA-I 25 µg/ml          | 18.33      | 11.05 to 25.62     | Yes              | ****    | 0.00002465       |  |
| Control vs. ApoA-I 50 µg/ml          | 48.33      | 41.05 to 55.62     | Yes              | ****    | <0.00000001      |  |
| Control vs. ApoA-I 100 µg/ml         | 65.33      | 58.05 to 72.62     | Yes              | ****    | <0.00000001      |  |
| Control vs. Resting                  | 55         | 47.72 to 62.28     | Yes              | ****    | <0.00000001      |  |
| ApoA-I 10 µg/ml vs. ApoA-I 25 µg/ml  | 2.667      | -4.618 to 9.952    | No               | ns      | 0.81490193       |  |
| ApoA-I 10 µg/ml vs. ApoA-I 50 µg/ml  | 32.67      | 25.38 to 39.95     | Yes              | ****    | 0.00000004       |  |
| ApoA-I 10 µg/ml vs. ApoA-I 100 µg/ml | 49.67      | 42.38 to 56.95     | Yes              | ****    | <0.00000001      |  |
| ApoA-I 10 µg/ml vs. Resting          | 39.33      | 32.05 to 46.62     | Yes              | ****    | <0.00000001      |  |
| ApoA-I 25 µg/ml vs. ApoA-I 50 µg/ml  | 30         | 22.72 to 37.28     | Yes              | ****    | 0.00000012       |  |
| ApoA-I 25 µg/ml vs. ApoA-I 100 µg/ml | 47         | 39.72 to 54.28     | Yes              | ****    | <0.00000001      |  |
| ApoA-I 25 µg/ml vs. Resting          | 36.67      | 29.38 to 43.95     | Yes              | ****    | 0.00000001       |  |
| ApoA-I 50 µg/ml vs. ApoA-I 100 µg/ml | 17         | 9.715 to 24.28     | Yes              | ****    | 0.00005311       |  |
| ApoA-I 50 µg/ml vs. Resting          | 6.667      | -0.6182 to 13.95   | No               | ns      | 0.08024647       |  |
| ApoA-I 100 µg/ml vs. Resting         | -10.33     | -17.62 to -3.048   | Yes              | **      | 0.00474365       |  |

**Table S2 - details of DEGS listed in Figure 6**

| <b>Fig. 6E</b> | <b>Fig. 6F</b> | <b>Fig. 6G</b> |
|----------------|----------------|----------------|
| Marco          | Nr1h3          | Slc25a20       |
| Timd4          | Cx3cr1         | Ptgds          |
| Cd209e         | Lipa           | Slc44a3        |
| Cd209b         | Npc1           | Ldhd           |
| Cd55           | Il1r2          | Dbi            |
| Cd209f         | Ccr2           | Fabp4          |
| Cd209d         | Ccl2           | Acox1          |
| Adora1         | Abca1          | Cpt1b          |
| S1pr2          | Msr1           | Pcca           |
| Lipa           | Il12a          | Eci1           |
| Itgax          | Fabp5          | Acly           |
| Galc           | Il12b          | Adhfe1         |
| Cd68           | Arg1           | Pdha1          |
| Il1r2          | Cxcl2          | Gstz1          |
| Itga5          | Cd36           | Decr1          |
| Plekhf1        | Tlr2           | Ehhadh         |
| Colec12        | Olr1           | Slc25a1        |
| Tgfb1          | Map2k3         | Pdk2           |
| Anxa2          | Mertk          | Fabp3          |
| Adam8          | Il1b           | Sucla2         |
| Trim29         | Nlrp3          | Scd1           |
| Atp6v1a        |                | Elovl6         |
| C3ar1          |                | Hadh           |
| Ctss           |                | Agpat2         |
| Clec5a         |                | Pnpla2         |
| Clec7a         |                | Chpt1          |
| Anxa1          |                | Etfhd          |
| Gpr137b        |                | Pdhd           |
| Litaf          |                | Suclg1         |
| Gusb           |                | Dlat           |
| Hexa           |                | Idh3a          |
| Ccr5           |                | Aco2           |
| Ctsl           |                | Acacb          |
| Igf2r          |                | Acadm          |
| Clec4e         |                | Gpd2           |
| Cd63           |                | Gpd1           |
| Cxcl16         |                | Pdk4           |
| Gla            |                | Ppara          |
| Clec4a2        |                | Acaa2          |
| Fcer1g         |                | Dgat2          |
| Fcgr4          |                | Acadvl         |
| Ada            |                | Slc27a2        |
| Ccr1           |                | Etfh           |
| Slc15a3        |                | Acaca          |
| C5ar1          |                | Cpt2           |
| Tlr8           |                | Bche           |
| Tpcn2          |                | Hadhb          |
| Clec4d         |                | Ecp1           |
| Cx3cr1         |                | Elovl3         |
| Lgmn           |                | Thrsp          |
| Fcgr1          |                | Cidea          |
| Galns          |                | Cidec          |
| Clec4a3        |                | Cyp2e1         |
| Asah1          |                | Fasn           |
| Clec12a        |                | Acss3          |
| Fcgr3          |                | Me1            |
| Mpo            |                | Crat           |
| Trpm2          |                | Fitm2          |
| Clec4a1        |                | Acsl1          |
| Slc11a1        |                | Cyp1a1         |
| Pla2g15        |                | Ucp3           |
| Cd300a         |                | Aacs           |
| Mertk          |                | Ephx2          |
| Pdgfrb         |                | Ndufv1         |
|                |                | Pccb           |
|                |                | Acat1          |
|                |                | Acot11         |
|                |                | Acat2          |
|                |                | Cyp4b1         |
|                |                | Etfb           |

## Major Resources Table

In order to allow validation and replication of experiments, all essential research materials listed in the Methods should be included in the Major Resources Table below. Authors are encouraged to use public repositories for protocols, data, code, and other materials and provide persistent identifiers and/or links to repositories when available. Authors may add or delete rows as needed.

### Animals (in vivo studies)

| Species | Vendor or Source       | Background Strain | Sex | Persistent ID / URL                                                               |
|---------|------------------------|-------------------|-----|-----------------------------------------------------------------------------------|
| mouse   | The Jackson Laboratory | C57BL6/J          | M   | <a href="https://www.jax.org/strain/000664">https://www.jax.org/strain/000664</a> |

### Genetically Modified Animals

|                        | Species | Vendor or Source       | Background Strain | Other Information                                            | Persistent ID / URL                                                               |
|------------------------|---------|------------------------|-------------------|--------------------------------------------------------------|-----------------------------------------------------------------------------------|
|                        | mouse   | The Jackson Laboratory | C57BL6/J          | Apoe <sup>-/-</sup>                                          | <a href="https://www.jax.org/strain/002052">https://www.jax.org/strain/002052</a> |
| <b>Parent - Male</b>   | mouse   | Professor Chiesa's Lab | C57BL6/J          | Apoe <sup>-/-</sup> Apoa1 <sup>-/-</sup>                     |                                                                                   |
| <b>Parent - Female</b> | mouse   | Professor Chiesa's Lab | C57BL6/J          | APOA1 <sup>tg</sup> Apoe <sup>-/-</sup> Apoa1 <sup>-/-</sup> |                                                                                   |

### Antibodies

| Target antigen       | Vendor or Source         | Catalog # | Working conc. | Persistent ID / URL                                                                                                                                                                                                                                                                                                                           |
|----------------------|--------------------------|-----------|---------------|-----------------------------------------------------------------------------------------------------------------------------------------------------------------------------------------------------------------------------------------------------------------------------------------------------------------------------------------------|
| Mac2                 | Cedarlane                | CL8942    | 1:1000        | <a href="https://www.cedarlanelabs.com/Contents/Files?filePath=pdf/16CLM%20Galectin-3%20Antibodies%20Flyer-unpriced_web.pdf">https://www.cedarlanelabs.com/Contents/Files?filePath=pdf/16CLM%20Galectin-3%20Antibodies%20Flyer-unpriced_web.pdf</a>                                                                                           |
| CD3                  | R&D Systems              | MAB4841   | 1:200         | <a href="https://www.rndsystems.com/products/mouse-cd3-antibody-17a2_mab4841">https://www.rndsystems.com/products/mouse-cd3-antibody-17a2_mab4841</a>                                                                                                                                                                                         |
| IBA-1                | WAKO                     | 019-19741 |               | <a href="https://labchem-wako.fujifilm.com/us/product/detail/W01W0101-1974.html">https://labchem-wako.fujifilm.com/us/product/detail/W01W0101-1974.html</a>                                                                                                                                                                                   |
| CD45R/B220           | BD Pharmingen            | 557390    |               | <a href="https://wwwbdbiosciences.com/en-us/products/reagents/flow-cytometry-reagents/research-reagents/single-color-antibodies-ruo/purified-rat-anti-mouse-cd45r.557390">https://wwwbdbiosciences.com/en-us/products/reagents/flow-cytometry-reagents/research-reagents/single-color-antibodies-ruo/purified-rat-anti-mouse-cd45r.557390</a> |
| CD3 epsilon          | Santa Cruz Biotechnology | SC-1127   |               | <a href="https://www.scbt.com/p/cd3-epsilon-antibody-m-20">https://www.scbt.com/p/cd3-epsilon-antibody-m-20</a>                                                                                                                                                                                                                               |
| CD4 (PE YTS 191.1.2) | Immunotools              | 22150044  |               | <a href="http://www.immunotools.de/html/datas-pe-m/22150044.pdf">http://www.immunotools.de/html/datas-pe-m/22150044.pdf</a>                                                                                                                                                                                                                   |
| CD44 (FITC, IM7)     | BD Pharmingen            | 553133    |               | <a href="https://wwwbdbiosciences.com/en-us/products/reagents/flow-cytometry-reagents/research-reagents/single-color-antibodies-ruo/fitc-rat-anti-mouse-cd44.553133">https://wwwbdbiosciences.com/en-us/products/reagents/flow-cytometry-reagents/research-reagents/single-color-antibodies-ruo/fitc-rat-anti-mouse-cd44.553133</a>           |

|                            |                             |            |       |                                                                                                                                                                                                                                                                                                                                                                 |
|----------------------------|-----------------------------|------------|-------|-----------------------------------------------------------------------------------------------------------------------------------------------------------------------------------------------------------------------------------------------------------------------------------------------------------------------------------------------------------------|
| CD45 (FITC, 30-F11)        | BD Pharmingen               | 553080     |       | <a href="https://wwwbdbiosciences.com/en-us/products/reagents/flow-cytometry-reagents/research-reagents/single-color-antibodies-ruo/fitc-rat-anti-mouse-cd45.553080">https://wwwbdbiosciences.com/en-us/products/reagents/flow-cytometry-reagents/research-reagents/single-color-antibodies-ruo/fitc-rat-anti-mouse-cd45.553080</a>                             |
| CD62L (APC, mMEL-14)       | BD Pharmingen               | 561919     |       | <a href="https://wwwbdbiosciences.com/en-us/products/reagents/flow-cytometry-reagents/research-reagents/single-color-antibodies-ruo/apc-rat-anti-mouse-cd62l.561919">https://wwwbdbiosciences.com/en-us/products/reagents/flow-cytometry-reagents/research-reagents/single-color-antibodies-ruo/apc-rat-anti-mouse-cd62l.561919</a>                             |
| Ly-6C (FITC AL-21)         | BD Pharmingen               | 553104     |       | <a href="https://wwwbdbiosciences.com/en-us/products/reagents/flow-cytometry-reagents/research-reagents/single-color-antibodies-ruo/fitc-rat-anti-mouse-ly-6c.553104">https://wwwbdbiosciences.com/en-us/products/reagents/flow-cytometry-reagents/research-reagents/single-color-antibodies-ruo/fitc-rat-anti-mouse-ly-6c.553104</a>                           |
| CD115 (APC AF598)          | eBioscience / Thermo Fisher | 17-1152-82 |       | <a href="https://www.thermofisher.com/antibody/product/CD115-c-fms-Antibody-clone-AFS98-Monoclonal/17-1152-82">https://www.thermofisher.com/antibody/product/CD115-c-fms-Antibody-clone-AFS98-Monoclonal/17-1152-82</a>                                                                                                                                         |
| CD11b (PE M1/70.15)        | Immunotools                 | 22159114   |       | <a href="http://www.immunotools.de/html/datas-pe-m/22159114.pdf">http://www.immunotools.de/html/datas-pe-m/22159114.pdf</a>                                                                                                                                                                                                                                     |
| CD11c (APC HL3)            | BD Pharmingen               | 561119     |       | <a href="https://wwwbdbiosciences.com/en-us/products/reagents/flow-cytometry-reagents/research-reagents/single-color-antibodies-ruo/apc-hamster-anti-mouse-cd11c.561119">https://wwwbdbiosciences.com/en-us/products/reagents/flow-cytometry-reagents/research-reagents/single-color-antibodies-ruo/apc-hamster-anti-mouse-cd11c.561119</a>                     |
| B220 (PerCP Cy5,5 RA3-6B2) | BD Pharmingen               | 561101     |       | <a href="https://wwwbdbiosciences.com/en-us/products/reagents/flow-cytometry-reagents/research-reagents/single-color-antibodies-ruo/percp-cy-5-5-rat-anti-mouse-cd45r-b220.561101">https://wwwbdbiosciences.com/en-us/products/reagents/flow-cytometry-reagents/research-reagents/single-color-antibodies-ruo/percp-cy-5-5-rat-anti-mouse-cd45r-b220.561101</a> |
| CD19 (FITC 1D3)            | BD Pharmingen               | 553785     |       | <a href="https://wwwbdbiosciences.com/en-us/products/reagents/flow-cytometry-reagents/research-reagents/single-color-antibodies-ruo/fitc-rat-anti-mouse-cd19.553785">https://wwwbdbiosciences.com/en-us/products/reagents/flow-cytometry-reagents/research-reagents/single-color-antibodies-ruo/fitc-rat-anti-mouse-cd19.553785</a>                             |
| CD5 (APC 53-7.3)           | BD Pharmingen               | 553023     |       | <a href="https://wwwbdbiosciences.com/en-us/products/reagents/flow-cytometry-reagents/research-reagents/single-color-antibodies-ruo/pe-rat-anti-mouse-cd5.553023">https://wwwbdbiosciences.com/en-us/products/reagents/flow-cytometry-reagents/research-reagents/single-color-antibodies-ruo/pe-rat-anti-mouse-cd5.553023</a>                                   |
| Anti-mouse CD4 BUV737      | BD Bioscience               | 612843     | 1:100 | <a href="https://wwwbdbiosciences.com/en-us/products/reagents/flow-cytometry-reagents/research-reagents/single-color-antibodies-ruo/buv737-rat-anti-mouse-cd4.612843">https://wwwbdbiosciences.com/en-us/products/reagents/flow-cytometry-reagents/research-reagents/single-color-antibodies-ruo/buv737-rat-anti-mouse-cd4.612843</a>                           |
| Anti-mouse CD8 BUV805      | BD Bioscience               | 612898     | 1:100 | <a href="https://wwwbdbiosciences.com/en-us/products/reagents/flow-cytometry-reagents/research-reagents/single-color-antibodies-ruo/buv805-rat-anti-mouse-cd8a.612898">https://wwwbdbiosciences.com/en-us/products/reagents/flow-cytometry-reagents/research-reagents/single-color-antibodies-ruo/buv805-rat-anti-mouse-cd8a.612898</a>                         |
| Anti-mouse IFN $\gamma$ PE | BD Bioscience               | 554412     | 1:100 | <a href="https://wwwbdbiosciences.com/en-us/products/reagents/flow-cytometry-reagents/research-reagents/single-color-antibodies-ruo/pe-rat-anti-mouse-ifn.554412">https://wwwbdbiosciences.com/en-us/products/reagents/flow-cytometry-reagents/research-reagents/single-color-antibodies-ruo/pe-rat-anti-mouse-ifn.554412</a>                                   |
| Anti-mouse IL-17A APC-Cy7  | BD Bioscience               | 560821     | 1:100 | <a href="https://wwwbdbiosciences.com/en-us/products/reagents/flow-cytometry-reagents/research-reagents/single-color-antibodies-ruo/apc-cy-7-rat-anti-mouse-il-17a.560821">https://wwwbdbiosciences.com/en-us/products/reagents/flow-cytometry-reagents/research-reagents/single-color-antibodies-ruo/apc-cy-7-rat-anti-mouse-il-17a.560821</a>                 |

|                       |               |            |       |                                                                                                                                                                                                                                                                                                                                           |
|-----------------------|---------------|------------|-------|-------------------------------------------------------------------------------------------------------------------------------------------------------------------------------------------------------------------------------------------------------------------------------------------------------------------------------------------|
| Anti-mouse IL-4 PECy7 | BD Bioscience | 560699     | 1:100 | <a href="https://wwwbdbiosciences.com/en-us/products/reagents/flow-cytometry-reagents/research-reagents/single-color-antibodies-ruo/pe-cy-7-rat-anti-mouse-il-4.560699">https://wwwbdbiosciences.com/en-us/products/reagents/flow-cytometry-reagents/research-reagents/single-color-antibodies-ruo/pe-cy-7-rat-anti-mouse-il-4.560699</a> |
| Anti-mouse IL-15Ra    | Invitrogen    | 17-7149-82 | 1:100 | <a href="https://www.thermofisher.com/antibody/product/CD215-IL-15Ra-Antibody-clone-DNT15Ra-Monoclonal/17-7149-82">https://www.thermofisher.com/antibody/product/CD215-IL-15Ra-Antibody-clone-DNT15Ra-Monoclonal/17-7149-82</a>                                                                                                           |
| Anti-mouse CD3        | Biolegend     | 100205     | N/A   | <a href="https://www.biolegend.com/en-us/products/pe-anti-mouse-cd3-antibody-47?GroupID=BLG242">https://www.biolegend.com/en-us/products/pe-anti-mouse-cd3-antibody-47?GroupID=BLG242</a>                                                                                                                                                 |
| Anti-mouse CD28       | Biolegend     | 102102     | N/A   | <a href="https://www.biolegend.com/en-us/products/purified-anti-mouse-cd28-antibody-117">https://www.biolegend.com/en-us/products/purified-anti-mouse-cd28-antibody-117</a>                                                                                                                                                               |

**Data & Code Availability**

Not applicable

**Other**

Not applicable
